# Supplementary material for: Visible-light-promoted sulfonylation of thiols with aryldiazonium and sodium metabisulphite leading to unsymmetrical thiosulfonates
Source: Royal Society of Chemistry journal article supplement (doi:10.1039/d1qo00112d), 2021-01-01

## Supplementary Information

# Visible-light-promoted sulfonylation of thiols with aryldiazonium and sodium metabisulphite leading to unsymmetrical thiosulfonates

Yufen Lv,<sup>a</sup> Jinyun Luo,<sup>a</sup> Yuchuan Ma,<sup>a</sup> Qi Dong,<sup>b\*</sup> Lin He<sup>a\*</sup>

<sup>a</sup> School of Chemistry and Chemical Engineering, Shihezi University, Xinjiang Uygur Autonomous Region, 832000, China

<sup>b</sup> Qinghai Provincial Key Laboratory of Tibetan Medicine Research and CAS Key Laboratory of Tibetan Medicine Research, Northwest Institute of Plateau Biology, Qinghai 810008, China

\* Corresponding author.

E-mail: helin@shzu.edu.cn; qdong@nwipb.cas.cn

## Table of Contents

|                                                                                                                                                                   |         |
|-------------------------------------------------------------------------------------------------------------------------------------------------------------------|---------|
| 1. General information.....                                                                                                                                       | S2      |
| 2. General procedure for visible-light-promoted sulfonylation of thiols with aryldiazonium and sodium metabisulphite leading to unsymmetrical thiosulfonates..... | S3      |
| 3. Preliminary mechanistic studies .....                                                                                                                          | S3-S6   |
| 4. Characterization data of products .....                                                                                                                        | S6-S13  |
| 5. Copies of NMR spectra.....                                                                                                                                     | S14-S48 |

## 1. General information

All commercially available reagent grade chemicals were purchased from Adamas, Strem, MERYER, Alfa Aesar and Energy Chemical Company and used as received without further purification unless otherwise stated.  $^1\text{H}$  NMR and  $^{13}\text{C}$  NMR were recorded in  $\text{CDCl}_3$  on a Bruker Avance III 500MHz or 400 MHz spectrometer with TMS as internal standard at room temperature, the chemical shifts ( $\delta$ ) were expressed in ppm and  $J$  values were given in Hz. The following abbreviations are used to indicate the multiplicity: singlet (s), doublet (d), triplet (t), quartet (q), doublet of doublets (dd), doublet of triplets (dt), and multiplet (m). All first order splitting patterns were assigned on the basis of the appearance of the multiplet. Splitting patterns that could not be easily interpreted were designated as multiplet (m). High-resolution mass spectra (HRMS) were obtained on an LTQ Orbitrap XL mass spectrometry equipped with an ESI source. Column chromatography was performed on silica gel (200-300 mesh).

**2. General procedure for visible-light-promoted sulfonylation of thiols with aryldiazonium and sodium metabisulphite leading to unsymmetrical thiosulfonates.**

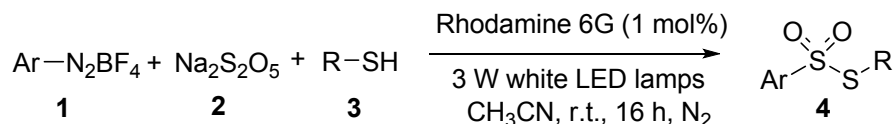

In a tube (25 mL), aryldiazonium tetrafluoroborate **1** (0.4 mmol), Na<sub>2</sub>S<sub>2</sub>O<sub>5</sub> **2** (0.4 mmol), thiols **3** (0.2 mmol), Rhodamine 6G (1 mol%), and CH<sub>3</sub>CN (2 mL) were added. The reaction mixture was stirred and irradiated by 3 W white LEDs at room temperature under nitrogen atmosphere for 16h. After completion of the reaction, the reaction mixture was concentrated in vacuum. The residue was purified by flash column chromatography using a mixture of petroleum ether and ethyl acetate as eluent to give the desired product **4**.

**Gram-scale experiment**

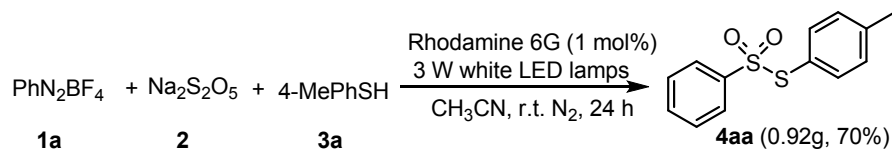

In a tube (25 mL), phenyldiazonium tetrafluoroborate **1a** (10 mmol), Na<sub>2</sub>S<sub>2</sub>O<sub>5</sub> **2** (10 mmol), 4-methylbenzenethiol **3a** (5 mmol), Rhodamine 6G (1 mol%), and CH<sub>3</sub>CN (5 mL) were added. The reaction mixture was stirred and irradiated by 3 W white LEDs at room temperature under nitrogen atmosphere for 24h. After completion of the reaction, 5 mL water was added. The mixture was extracted by ethyl acetate. The extracting solution was concentrated in vacuum. The residue was purified by flash column chromatography using a mixture of petroleum ether and ethyl acetate as eluent to give the desired product **4aa** in 0.92g (70%).

### 3. Preliminary mechanistic studies

#### 3.1 The addition of TEMPO in the model reaction system.

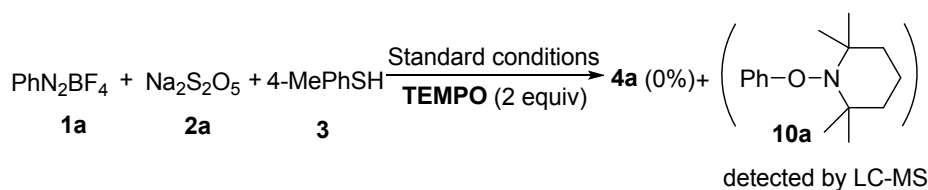

In a tube (25 mL), phenyldiazonium tetrafluoroborate **1a** (0.4 mmol), Na<sub>2</sub>S<sub>2</sub>O<sub>5</sub> **2a** (0.4 mmol), 4-methylbenzenethiol **3a** (0.2 mmol), Rhodamine 6G (1 mol%), TEMPO (0.4 mmol), and CH<sub>3</sub>CN (2 mL) were added. The reaction mixture was stirred and irradiated by 3 W white LEDs at room temperature under nitrogen atmosphere for 16h. After completion of the reaction, the reaction mixture was concentrated in vacuum. None of the desired product **4aa** was detected and aryl-TEMPO adduct was detected by LC-MS.

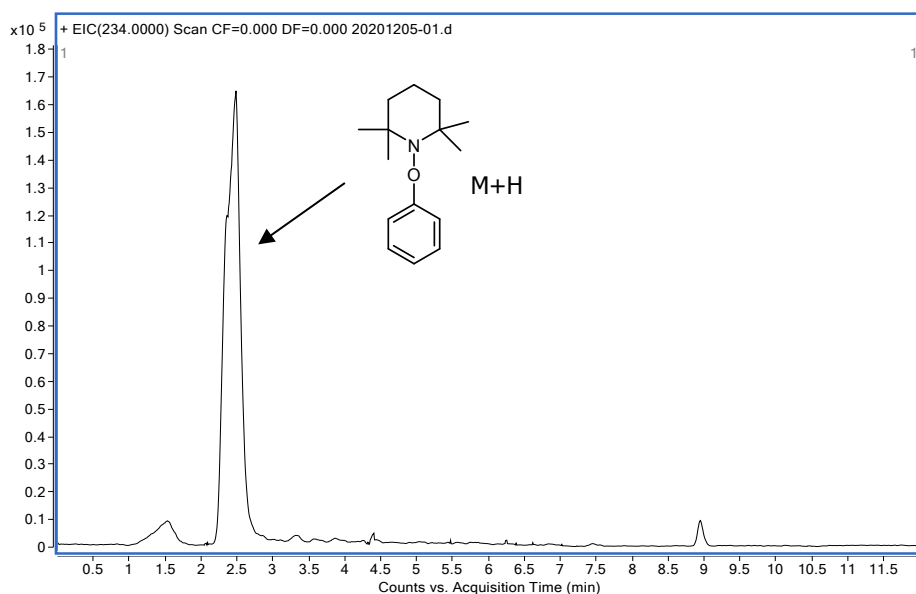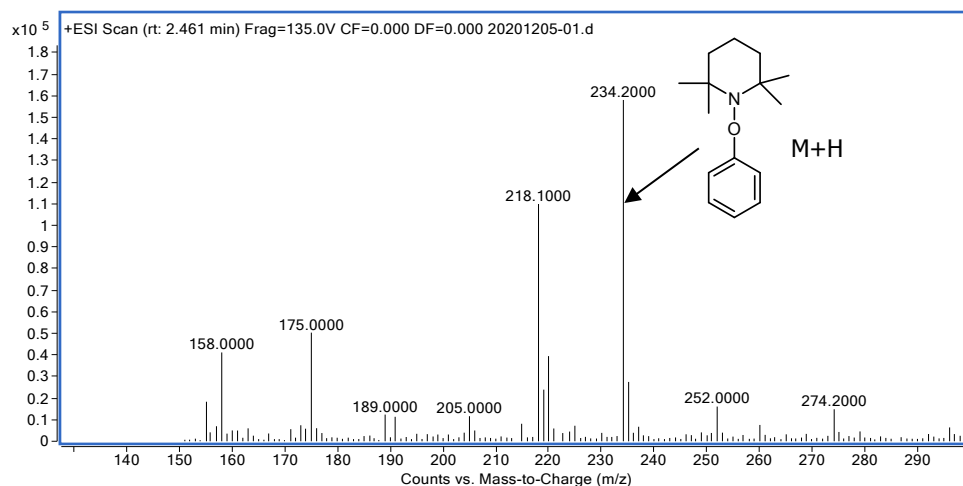

### 3.2 The detection of disulfide in the reaction system

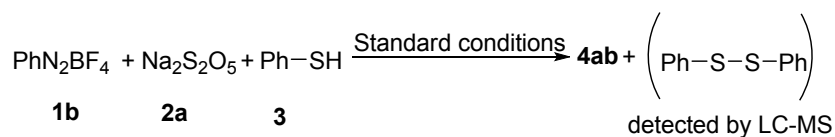

In a tube (25 mL), phenyldiazonium tetrafluoroborate **1a** (0.4 mmol), Na<sub>2</sub>S<sub>2</sub>O<sub>5</sub> **2a** (0.4 mmol), 4-methylbenzenethiol **3a** (0.2 mmol) and CH<sub>3</sub>CN (2 mL) were added. The reaction mixture was stirred and irradiated by 3 W white LEDs at room temperature under nitrogen atmosphere for 16h. After completion of the reaction, the reaction mixture was concentrated in vacuum. In addition to product **4ab**, 1,2-diphenyldisulfide **3b'** was detected.

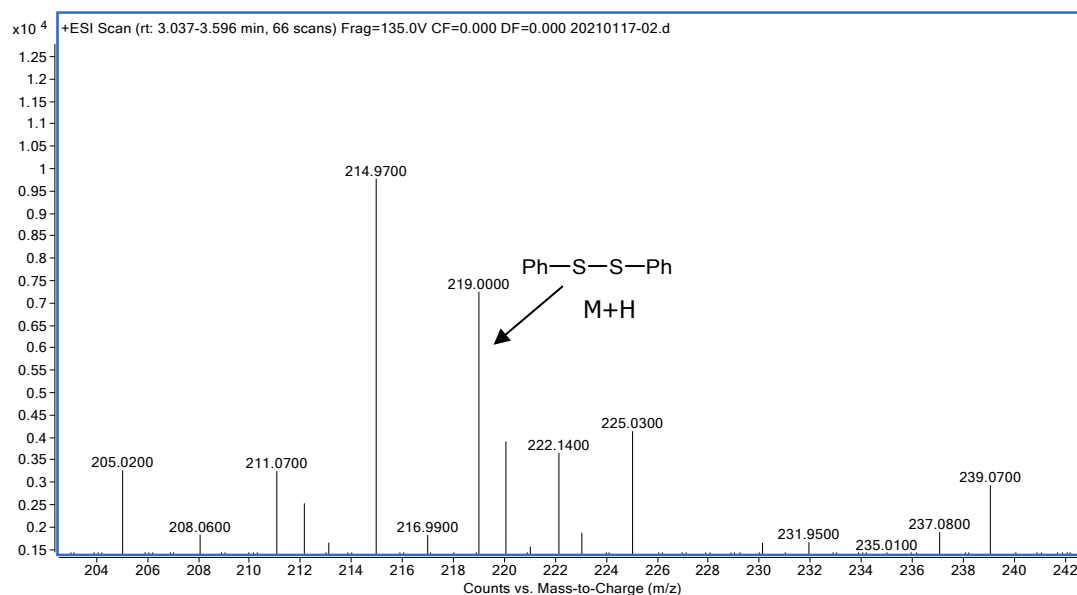

### 3.2 The reaction of phenyldiazonium tetrafluoroborate, Na<sub>2</sub>S<sub>2</sub>O<sub>5</sub>, 1,2-diphenyldisulfide under the standard conditions

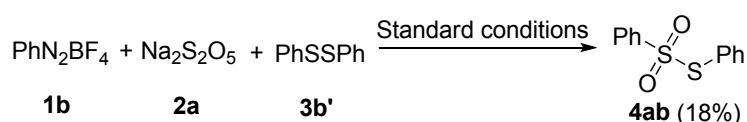

In a tube (25 mL), phenyldiazonium tetrafluoroborate **1a** (0.4 mmol), Na<sub>2</sub>S<sub>2</sub>O<sub>5</sub> **2a** (0.4 mmol), 1,2-diphenyldisulfide **3b'** (0.2 mmol) and CH<sub>3</sub>CN (2 mL) were added. The reaction mixture was stirred and irradiated by 3 W white LEDs at room temperature under nitrogen atmosphere for 16h. After completion of the reaction, the

reaction mixture was concentrated in vacuum. The residue was purified by flash column chromatography using a mixture of petroleum ether and ethyl acetate as eluent to give the desired product **4ab** in 18% yield.

#### 4. Characterization data of products

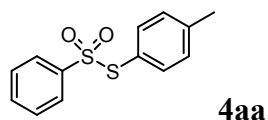

**S-p-tolyl benzenesulfonothioate** Yellow oil.  $^1\text{H}$  NMR (500 MHz,  $\text{CDCl}_3$ ):  $\delta$  7.58-7.56 (m, 3H), 7.42 (t,  $J = 7.3$  Hz, 2H), 7.22 (d,  $J = 7.7$  Hz, 2H), 7.13(d,  $J = 7.8$  Hz, 2H), 2.37 (s, 3H).  $^{13}\text{C}$  NMR ( $\text{CDCl}_3$ , 125 MHz, ppm)  $\delta$  143.1, 142.2, 136.5, 133.6, 130.2, 128.8, 127.6, 124.4, 21.5. ESI HRMS: calculated for  $\text{C}_{13}\text{H}_{13}\text{O}_2\text{S}_2$   $[\text{M}+\text{H}]^+$  265.0357, found 265.0353.

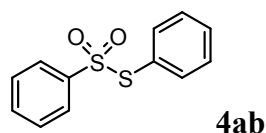

**S-phenyl benzenesulfonothioate** Yellow oil.  $^1\text{H}$  NMR (400 MHz,  $\text{CDCl}_3$ ):  $\delta$  7.59 - 7.55 (m, 3H), 7.48 - 7.45 (m, 1H), 7.43-7.40 (m, 2H), 7.34-7.31 (m, 4H);  $^{13}\text{C}$  NMR (100 MHz,  $\text{CDCl}_3$ ):  $\delta$  142.9, 136.6, 133.7, 131.5, 129.5, 128.8, 127.8, 127.6. ESI HRMS: calculated for  $\text{C}_{12}\text{H}_{11}\text{O}_2\text{S}_2$   $[\text{M}+\text{H}]^+$  251.0200, found 251.0217.

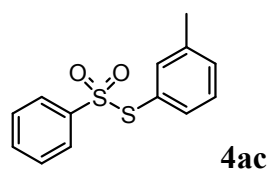

**S-m-tolyl benzenesulfonothioate** Yellow oil.  $^1\text{H}$  NMR (400 MHz,  $\text{CDCl}_3$ ):  $\delta$  7.58-7.54 (m, 3H), 7.40 (d,  $J = 7.2$  Hz, 2H), 7.24 (s, 1H), 7.19 (t,  $J = 7.5$  Hz, 1H), 7.12 - 7.10 (m, 2H), 2.26 (s, 3H);  $^{13}\text{C}$  NMR (100 MHz,  $\text{CDCl}_3$ ):  $\delta$  142.9, 139.5, 137.2, 133.6, 133.6, 132.2, 129.2, 128.7, 127.7, 127.4, 21.2. ESI HRMS: calculated for  $\text{C}_{13}\text{H}_{13}\text{O}_2\text{S}_2$   $[\text{M}+\text{H}]^+$  265.0357, found 265.0369.

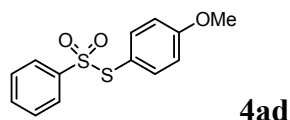

**S-4-methoxyphenyl benzenesulfonothioate** Yellow solid, mp 56 - 57  $^\circ\text{C}$ .  $^1\text{H}$  NMR (500 MHz,  $\text{CDCl}_3$ ):  $\delta$  7.59-7.56 (m, 3H), 7.43 (t,  $J = 7.4$  Hz, 2H), 7.24 (d,  $J = 8.6$  Hz, 2H), 6.83 (d,  $J = 8.6$  Hz, 2H), 3.82 (s, 3H);  $^{13}\text{C}$  NMR (125 MHz,  $\text{CDCl}_3$ ):  $\delta$  162.4, 143.0, 138.4, 133.6, 128.8, 127.6, 118.5, 115.0, 55.5. ESI HRMS: calculated for  $\text{C}_{13}\text{H}_{13}\text{O}_3\text{S}_2$   $[\text{M}+\text{H}]^+$  281.0306, found 281.0301.

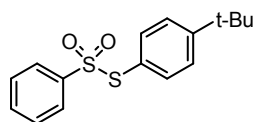

**4ae**

**S-4-tert-butylphenyl benzenesulfonothioate** White solid, mp 60 - 61 °C. <sup>1</sup>H NMR (400 MHz, CDCl<sub>3</sub>): δ 7.59 - 7.55 (m, 3H), 7.41 (t, *J* = 7.4 Hz, 2H), 7.34 (t, *J* = 8.4 Hz, 2H), 7.26 (t, *J* = 8.4 Hz, 2H), 1.31 (s, 9H); <sup>13</sup>C NMR (100 MHz, CDCl<sub>3</sub>): δ 155.3, 143.1, 136.3, 133.6, 128.8, 127.6, 126.6, 124.4, 35.0, 31.2. ESI HRMS: calculated for C<sub>16</sub>H<sub>19</sub>O<sub>2</sub>S<sub>2</sub> [M+H]<sup>+</sup> 307.0826, found 307.0811.

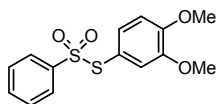

**4af**

**S-3,4-dimethoxyphenyl benzenesulfonothioate** Yellow oil. <sup>1</sup>H NMR (500 MHz, CDCl<sub>3</sub>): δ 7.61 - 7.57 (m, 3H), 7.44 (t, *J* = 7.8 Hz, 2H), 6.96 (dd, *J*<sub>1</sub> = 1.8 Hz, *J*<sub>2</sub> = 8.4 Hz, 1H), 6.81 (d, *J* = 8.4 Hz, 1H), 6.72 (d, *J* = 1.8 Hz, 1H), 3.90 (s, 3H), 3.71 (s, 3H); <sup>13</sup>C NMR (125 MHz, CDCl<sub>3</sub>): δ 152.0, 149.1, 142.9, 133.5, 130.4, 128.8, 127.8, 118.7, 118.6, 111.4, 56.0, 55.9. ESI HRMS: calculated for C<sub>14</sub>H<sub>15</sub>O<sub>4</sub>S<sub>2</sub> [M+H]<sup>+</sup> 311.0412, found 311.0408.

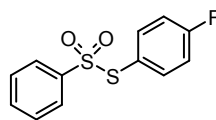

**4ag**

**S-4-fluorophenyl benzenesulfonothioate** Yellow oil. <sup>1</sup>H NMR (400 MHz, CDCl<sub>3</sub>): δ 7.62 - 7.57 (m, 3H), 7.47 - 7.42 (m, 2H), 7.36 - 7.32 (m, 2H), 7.03 (t, *J* = 8.6 Hz, 2H), 3.98 (s, 3H); <sup>13</sup>C NMR (100 MHz, CDCl<sub>3</sub>): δ 164.8 (t, *J* = 252.5 Hz), 142.7, 138.9 (d, *J* = 9.1 Hz), 133.8, 128.9, 127.6, 123.4 (d, *J* = 3.3 Hz), 116.8 (d, *J* = 22.1 Hz). ESI HRMS: calculated for C<sub>12</sub>H<sub>9</sub>FN<sub>2</sub>O<sub>2</sub>S<sub>2</sub> [M+H]<sup>+</sup> 290.9926, found 290.9944.

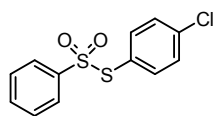

**4ah**

**S-4-chlorophenyl benzenesulfonothioate** White solid, mp, 66 - 67 °C. <sup>1</sup>H NMR (400 MHz, CDCl<sub>3</sub>): δ 7.62 - 7.58 (m, 3H), 7.45 (t, *J* = 7.4 Hz, 2H), 7.33-7.27 (m, 4H); <sup>13</sup>C NMR (100 MHz, CDCl<sub>3</sub>): δ 142.8, 138.3, 137.8, 133.9, 129.8, 129.0, 127.6, 126.3. ESI HRMS: calculated for C<sub>12</sub>H<sub>10</sub>ClO<sub>2</sub>S<sub>2</sub> [M+H]<sup>+</sup> 284.9811, found 284.9815.

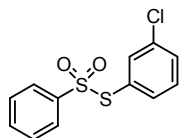

**4ai**

**S-3-chlorophenyl benzenesulfonothioate** Yellow oil. <sup>1</sup>H NMR (400 MHz, CDCl<sub>3</sub>): δ 7.64 - 7.60 (m, 3H), 7.50 - 7.46 (m, 3H), 7.32 - 7.29 (m, 3H); <sup>13</sup>C NMR (100 MHz, CDCl<sub>3</sub>): δ 142.7, 136.1, 134.9, 134.7, 134.0, 131.6, 130.5, 129.5, 129.0, 127.6. ESI HRMS: calculated for C<sub>12</sub>H<sub>10</sub>ClO<sub>2</sub>S<sub>2</sub> [M+H]<sup>+</sup> 284.9811, found 284.9822.

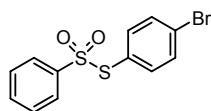

**4aj**

**S-4-bromophenyl benzenesulfonothioate** White solid, mp, 72 - 73 °C. <sup>1</sup>H NMR (400 MHz, CDCl<sub>3</sub>): δ 7.62-7.58 (m, 3H), 7.49-7.44 (m, 4H), 7.20 (d, *J* = 8.4 Hz, 2H). <sup>13</sup>C NMR (CDCl<sub>3</sub>, 100 MHz, ppm) δ 142.8, 137.9, 133.9, 132.8, 129.0, 127.6, 126.9, 126.8. ESI HRMS: calculated for C<sub>12</sub>H<sub>9</sub>BrNaO<sub>2</sub>S<sub>2</sub> [M+Na]<sup>+</sup> 350.9125, found 350.9087.

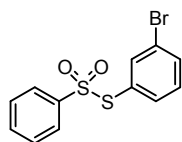

**4ak**

**S-3-bromophenyl benzenesulfonothioate** Yellow oil. <sup>1</sup>H NMR (400 MHz, CDCl<sub>3</sub>): δ 7.64 - 7.58 (m, 4H), 7.47 (t, *J* = 7.4 Hz, 2H), 7.41 (t, *J* = 1.8 Hz, 1H), 7.35-7.33 (m, 1H), 7.23 (t, *J* = 7.9 Hz, 1H); <sup>13</sup>C NMR (100 MHz, CDCl<sub>3</sub>): δ 142.6, 138.9, 135.1, 134.5, 134.0, 130.7, 129.7, 129.0, 127.7, 122.7. ESI HRMS: calculated for C<sub>12</sub>H<sub>9</sub>BrNaO<sub>2</sub>S<sub>2</sub> [M+Na]<sup>+</sup> 350.9125, found 350.9125.

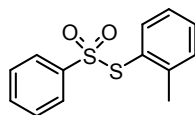

**4al**

#### **S-o-tolyl benzenesulfonothioate**

Yellow oil. <sup>1</sup>H NMR (400 MHz, CDCl<sub>3</sub>): δ 7.61-7.54 (m, 3H), 7.42 (t, *J* = 7.9 Hz, 2H), 7.38-7.32 (m, 2H), 7.22 (d, *J* = 7.6 Hz, 1H), 7.15 (t, *J* = 7.8 Hz, 1H), 2.12 (s, 3H); <sup>13</sup>C NMR (100 MHz, CDCl<sub>3</sub>): δ 144.2, 143.3, 138.3, 133.7, 131.9, 131.0, 128.9, 127.5, 127.1, 126.9, 20.6. ESI HRMS: calculated for C<sub>13</sub>H<sub>13</sub>O<sub>2</sub>S<sub>2</sub> [M+H]<sup>+</sup> 265.0357, found 265.0336.

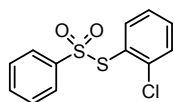

**4am**

**S-2-chlorophenyl benzenesulfonothioate** White solid, mp, 63 - 64 °C. <sup>1</sup>H NMR (400 MHz, CDCl<sub>3</sub>): δ 7.68 (dd, *J*<sub>1</sub> = 1.6 Hz, *J*<sub>2</sub> = 7.8 Hz, 1H), 7.62 - 7.51 (m, 3H), 7.45 - 7.39 (m, 3H), 7.38-7.36 (m, 1H), 7.31 (t, *J*<sub>1</sub> = 1.7 Hz, *J*<sub>2</sub> = 7.6 Hz, 1H); <sup>13</sup>C NMR (100 MHz, CDCl<sub>3</sub>): δ 143.4, 140.3, 139.6, 134.0, 133.0, 130.3, 129.1, 127.8, 127.5, 127.0. ESI HRMS: calculated for C<sub>12</sub>H<sub>10</sub>ClO<sub>2</sub>S<sub>2</sub> [M+H]<sup>+</sup> 284.9811, found 284.9826.

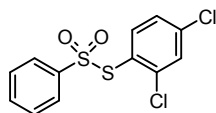

**4an**

**S-2,4-dichlorophenyl benzenesulfonothioate** Yellow oil. <sup>1</sup>H NMR (400 MHz, CDCl<sub>3</sub>): δ 7.64 - 7.60 (m, 4H), 7.48 - 7.44 (m, 2H), 7.39 (d, *J* = 2.2 Hz, 1H), 7.31 (dd, *J*<sub>1</sub> = 2.2 Hz, *J*<sub>2</sub> = 8.4 Hz, 1H); <sup>13</sup>C NMR (100 MHz, CDCl<sub>3</sub>): δ 143.4, 141.1, 140.2, 138.9, 134.1, 130.2, 129.2, 128.2, 127.5, 125.7. ESI HRMS: calculated for C<sub>12</sub>H<sub>9</sub>Cl<sub>2</sub>O<sub>2</sub>S<sub>2</sub> [M+H]<sup>+</sup> 318.9421, found 318.9435.



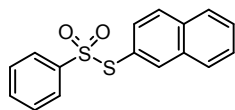

**4ao**

**naphthalen-2-yl benzenesulfonothioate** Yellow oil.  $^1\text{H}$  NMR (400 MHz,  $\text{CDCl}_3$ ):  $\delta$  7.85 (d,  $J = 7.8$  Hz, 2H), 7.79 (d,  $J = 8.6$  Hz, 1H), 7.74 (d,  $J = 7.9$  Hz, 1H), 7.62-7.51 (m, 5H), 7.40-7.36 (m, 3H).  $^{13}\text{C}$  NMR ( $\text{CDCl}_3$ , 100 MHz, ppm)  $\delta$  142.9, 137.7, 134.1, 133.7, 133.3, 131.8, 129.2, 128.9, 128.5, 128.3, 127.8, 127.6, 127.0, 124.9. ESI HRMS: calculated for  $\text{C}_{16}\text{H}_{13}\text{O}_2\text{S}_2$   $[\text{M}+\text{H}]^+$  301.0357, found 301.0333.

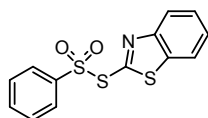

**4ap**

**S-benzo[d]thiazol-2-yl benzenesulfonothioate** Yellow oil.  $^1\text{H}$  NMR (500 MHz,  $\text{CDCl}_3$ ):  $\delta$  7.88 (d,  $J = 8.2$  Hz, 1H), 7.74 (d,  $J = 7.0$  Hz, 2H), 7.65 (d,  $J = 8.0$  Hz, 1H), 7.53-7.46 (m, 3H), 7.42 (t,  $J = 8.6$  Hz, 1H), 7.28-7.25 (m, 1H).  $^{13}\text{C}$  NMR ( $\text{CDCl}_3$ , 125 MHz, ppm)  $\delta$  169.8, 154.0, 135.6, 135.4, 130.5, 130.0, 126.2, 124.4, 122.0, 120.8. ESI HRMS: calculated for  $\text{C}_{13}\text{H}_{10}\text{NO}_2\text{S}_3$   $[\text{M}+\text{H}]^+$  307.9874, found 307.9883.

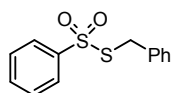

**4aq**

**S-benzyl benzenesulfonothioate** Yellow oil.  $^1\text{H}$  NMR (400 MHz,  $\text{CDCl}_3$ ):  $\delta$  7.84-7.82 (m, 2H), 7.59 (t,  $J = 7.4$  Hz, 1H), 7.48 (t,  $J = 8.0$  Hz, 2H), 7.24-7.16 (m, 5H), 4.27 (s, 2H);  $^{13}\text{C}$  NMR (100 MHz,  $\text{CDCl}_3$ ):  $\delta$  144.9, 133.6, 133.5, 129.2, 129.1, 128.8, 128.1, 126.9, 40.4. ESI HRMS: calculated for  $\text{C}_{13}\text{H}_{13}\text{O}_2\text{S}_2$   $[\text{M}+\text{H}]^+$  265.0357, found 265.0369.

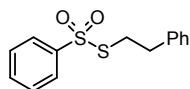

**4ar**

**S-phenethyl benzenesulfonothioate** Yellow oil.  $^1\text{H}$  NMR (400 MHz,  $\text{CDCl}_3$ ):  $\delta$  8.05 (d,  $J = 7.4$  Hz, 2H), 7.74 (t,  $J = 7.4$  Hz, 1H), 7.66 (t,  $J = 7.9$  Hz, 2H), 7.40-7.30 (m, 3H), 7.19 (d,  $J = 7.0$  Hz, 2H), 3.34 (t,  $J = 7.4$  Hz, 2H), 3.00 (t,  $J = 7.4$  Hz, 2H);  $^{13}\text{C}$  NMR (100 MHz,  $\text{CDCl}_3$ ):  $\delta$  144.9, 138.7, 133.8, 129.4, 128.7, 128.6, 127.0, 126.9, 37.2, 35.2. ESI HRMS: calculated for  $\text{C}_{14}\text{H}_{15}\text{O}_2\text{S}_2$   $[\text{M}+\text{H}]^+$  279.0513, found 279.0497.

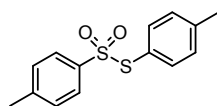

**4ba**

**S-p-tolyl 4-methylbenzenesulfonothioate** White solid, mp, 67 - 68 °C.  $^1\text{H}$  NMR (500 MHz,  $\text{CDCl}_3$ ):  $\delta$  7.45 (d,  $J = 8.2$  Hz, 2H), 7.24 (d,  $J = 8.0$  Hz, 2H), 7.21 (d,  $J = 8.0$  Hz, 2H), 7.14 (d,  $J = 7.9$  Hz, 2H), 2.42 (s, 3H), 2.38 (s, 3H).  $^{13}\text{C}$  NMR ( $\text{CDCl}_3$ , 125 MHz, ppm)  $\delta$  144.7, 142.1, 140.4, 136.5, 130.3, 129.4, 127.6, 124.6, 21.7, 21.5. ESI HRMS: calculated for  $\text{C}_{14}\text{H}_{15}\text{O}_2\text{S}_2$   $[\text{M}+\text{H}]^+$  279.0513, found 279.0533.

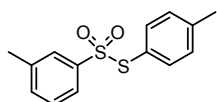

**4ca**

**S-p-tolyl 3-methylbenzenesulfonothioate** Yellow oil.  $^1\text{H}$  NMR (500 MHz,  $\text{CDCl}_3$ ):  $\delta$  7.38-7.35 (m, 3H), 7.31-7.28 (m, 1H), 7.23 (d,  $J = 8.2$  Hz, 2H), 7.14 (d,  $J = 8.0$  Hz, 2H), 2.38 (s, 3H), 2.34 (s, 3H);  $^{13}\text{C}$  NMR (125 MHz,  $\text{CDCl}_3$ ):  $\delta$  142.8, 142.2, 139.1, 136.6, 134.3, 130.2, 128.6, 127.9, 124.7, 124.5, 21.5, 21.2. ESI HRMS: calculated for  $\text{C}_{14}\text{H}_{15}\text{O}_2\text{S}_2$   $[\text{M}+\text{H}]^+$  279.0513, found 279.0524.

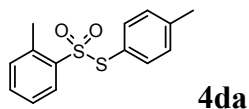

**S-p-tolyl 2-methylbenzenesulfonothioate** Yellow oil.  $^1\text{H}$  NMR (400 MHz,  $\text{CDCl}_3$ ):  $\delta$  7.47 - 7.43 (m, 1H), 7.42-7.39 (m, 1H), 7.33 (d,  $J = 7.5$  Hz, 2H), 7.15 - 7.11 (m, 3H), 7.07 (d,  $J = 8.1$  Hz, 2H), 2.70 (s, 3H), 2.34 (s, 3H);  $^{13}\text{C}$  NMR (100 MHz,  $\text{CDCl}_3$ ):  $\delta$  142.1, 140.4, 137.8, 136.5, 133.7, 132.8, 130.3, 130.1, 125.7, 124.3, 21.5, 20.5. ESI HRMS: calculated for  $\text{C}_{14}\text{H}_{15}\text{O}_2\text{S}_2$   $[\text{M}+\text{H}]^+$  279.0513, found 279.0507.

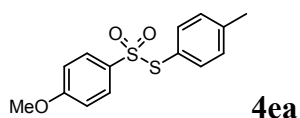

**S-p-tolyl 4-methoxybenzenesulfonothioate** White solid, mp, 61 - 62 °C.  $^1\text{H}$  NMR (400 MHz,  $\text{CDCl}_3$ ):  $\delta$  7.49 (d,  $J = 9.0$  Hz, 2H), 7.23 (d,  $J = 8.0$  Hz, 2H), 7.14 (d,  $J = 8.0$  Hz, 2H), 6.86 (d,  $J = 9.0$  Hz, 2H), 3.87 (s, 3H), 2.37 (s, 3H).  $^{13}\text{C}$  NMR ( $\text{CDCl}_3$ , 100 MHz, ppm)  $\delta$  163.5, 142.0, 136.5, 135.1, 130.2, 129.9, 124.7, 113.8, 55.7, 21.5. ESI HRMS: calculated for  $\text{C}_{14}\text{H}_{15}\text{O}_3\text{S}_2$   $[\text{M}+\text{H}]^+$  295.0463, found 295.0462.

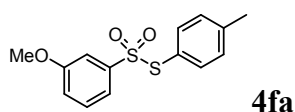

**S-p-tolyl 3-methoxybenzenesulfonothioate** Yellow solid, mp, 46 - 47 °C.  $^1\text{H}$  NMR (400 MHz,  $\text{CDCl}_3$ ):  $\delta$  7.41 (t,  $J = 8.0$  Hz, 1H), 7.35-7.33 (m, 2H), 7.26-7.23 (m, 3H), 7.20-7.17 (m, 1H), 7.10 (t,  $J = 2.0$  Hz, 1H), 3.81 (s, 3H), 2.36 (s, 3H);  $^{13}\text{C}$  NMR (100 MHz,  $\text{CDCl}_3$ ):  $\delta$  159.5, 144.0, 142.2, 136.6, 130.3, 129.8, 124.5, 120.6, 119.8, 111.5, 55.6, 21.5. ESI HRMS: calculated for  $\text{C}_{14}\text{H}_{15}\text{O}_3\text{S}_2$   $[\text{M}+\text{H}]^+$  295.0463, found 295.0470.

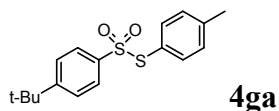

**S-p-tolyl 4-tert-butylbenzenesulfonothioate** Yellow solid, mp, 87 - 88 °C.  $^1\text{H}$  NMR (400 MHz,  $\text{CDCl}_3$ ):  $\delta$  7.50 (d,  $J = 8.7$  Hz, 2H), 7.42 (d,  $J = 8.7$  Hz, 2H), 7.23 (d,  $J = 8.1$  Hz, 2H), 7.13 (t,  $J = 8.0$  Hz, 2H), 2.38 (s, 3H), 1.33 (s, 9H);  $^{13}\text{C}$  NMR (100 MHz,  $\text{CDCl}_3$ ):  $\delta$  157.6, 142.1, 140.3, 136.6, 130.2, 127.5, 125.8, 124.6, 35.3, 31.1, 21.5. ESI HRMS: calculated for  $\text{C}_{17}\text{H}_{21}\text{O}_2\text{S}_2$   $[\text{M}+\text{H}]^+$  321.0983, found 321.0954.

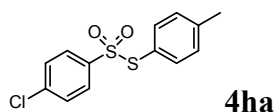

**S-p-tolyl 4-chlorobenzenesulfonothioate** White solid, mp, 122 - 123 °C.  $^1\text{H}$  NMR (400 MHz,  $\text{CDCl}_3$ ):  $\delta$  7.49 (d,  $J = 8.7$  Hz, 2H), 7.39 (d,  $J = 8.7$  Hz, 2H), 7.24 (d,  $J = 8.2$  Hz, 2H), 7.16 (d,  $J = 8.0$  Hz, 2H), 2.39 (s, 3H).  $^{13}\text{C}$  NMR ( $\text{CDCl}_3$ , 100 MHz, ppm)

$\delta$  142.5, 141.5, 140.2, 136.5, 130.4, 129.1, 129.0, 124.1, 21.6. ESI HRMS: calculated for  $C_{13}H_{12}ClO_2S_2$   $[M+H]^+$  284.9811, found 284.9826.

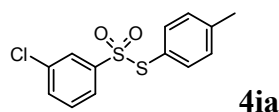

**S-p-tolyl 3-chlorobenzenesulfonothioate** Yellow solid, mp, 70 - 71 °C.  $^1H$  NMR (400 MHz,  $CDCl_3$ ):  $\delta$  7.55-7.53 (m, 1H), 7.48 (t,  $J = 1.7$  Hz, 1H), 7.47-7.44 (m, 1H), 7.37 (t,  $J = 7.9$  Hz, 1H), 7.24 (d,  $J = 8.2$  Hz, 2H), 7.17 (d,  $J = 8.2$  Hz, 2H), 2.39 (s, 3H);  $^{13}C$  NMR (100 MHz,  $CDCl_3$ ):  $\delta$  144.3, 142.6, 136.5, 135.0, 133.6, 130.4, 130.0, 127.7, 125.6, 123.9, 21.5. ESI HRMS: calculated for  $C_{13}H_{11}ClNaO_2S_2$   $[M+Na]^+$  320.9787, found 320.9794.

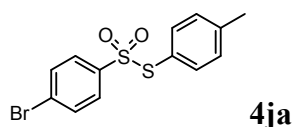

**S-p-tolyl 4-bromobenzenesulfonothioate** White solid, mp, 115 - 116 °C.  $^1H$  NMR (400 MHz,  $CDCl_3$ ):  $\delta$  7.56 (d,  $J = 8.6$  Hz, 2H), 7.42 (d,  $J = 8.36$  Hz, 2H), 7.25 (d,  $J = 8.0$  Hz, 2H), 7.17 (d,  $J = 8.1$  Hz, 2H), 2.39 (s, 3H);  $^{13}C$  NMR (100 MHz,  $CDCl_3$ ):  $\delta$  142.6, 142.2, 136.6, 132.2, 130.5, 129.1, 128.9, 124.2, 21.6. ESI HRMS: calculated for  $C_{13}H_{12}BrO_2S_2$   $[M+H]^+$  342.9462, found 342.9471.

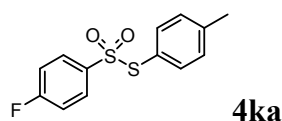

**S-p-tolyl 4-fluorobenzenesulfonothioate** White solid, mp, 97 - 98 °C.  $^1H$  NMR (400 MHz,  $CDCl_3$ ):  $\delta$  7.60 - 7.56 (m, 2H), 7.23 (d,  $J = 8.2$  Hz, 2H), 7.15 (d,  $J = 8.2$  Hz, 2H), 7.09 (t,  $J = 8.2$  Hz, 2H), 2.38 (s, 3H).  $^{13}C$  NMR ( $CDCl_3$ , 100 MHz, ppm)  $\delta$  165.6 (d,  $J_{C-F} = 255.1$  Hz), 142.5, 139.1 (d,  $J_{C-F} = 3.0$  Hz), 136.5, 130.4 (d,  $J_{C-F} = 9.6$  Hz), 130.3, 124.2, 116.1 (d,  $J_{C-F} = 22.7$  Hz), 21.5. ESI HRMS: calculated for  $C_{13}H_{12}FO_2S_2$   $[M+H]^+$  283.0263, found 283.0277.

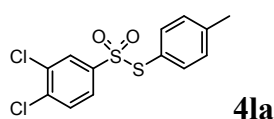

**S-p-tolyl 3,4-dichlorobenzenesulfonothioate** White solid, mp, 98 - 99 °C.  $^1H$  NMR (400 MHz,  $CDCl_3$ ):  $\delta$  7.56 (d,  $J = 2.1$  Hz, 2H), 7.51 (d,  $J = 8.4$  Hz, 2H), 7.38 (dd,  $J = 2.1$  Hz,  $J = 8.4$  Hz, 2H), 7.27 (d,  $J = 7.9$  Hz, 2H), 7.19 (d,  $J = 8.1$  Hz, 1H), 2.41 (s, 3H);  $^{13}C$  NMR (100 MHz,  $CDCl_3$ ):  $\delta$  142.8, 142.3, 138.5, 136.5, 133.5, 130.8, 130.6, 129.5, 126.4, 123.8, 21.5. ESI HRMS: calculated for  $C_{13}H_{10}Cl_2NaO_2S_2$   $[M+Na]^+$  354.9397, found 354.9383.

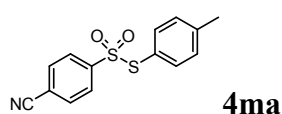

**S-p-tolyl 4-cyanobenzenesulfonothioate** White solid, mp, 105 - 106 °C.  $^1H$  NMR (400 MHz,  $CDCl_3$ ):  $\delta$  7.72 (d,  $J = 8.6$  Hz, 2H), 7.66 (d,  $J = 8.6$  Hz, 2H), 7.23 (d,  $J =$

8.2 Hz, 2H), 7.17 (d,  $J = 8.2$  Hz, 2H), 2.39 (s, 3H).  $^{13}\text{C}$  NMR ( $\text{CDCl}_3$ , 100 MHz, ppm)  $\delta$  146.6, 142.9, 136.4, 132.7, 130.6, 128.1, 123.5, 117.1, 117.1, 21.6. ESI HRMS: calculated for  $\text{C}_{14}\text{H}_{11}\text{NNaO}_2\text{S}_2$   $[\text{M}+\text{Na}]^+$  312.0129, found 312.0121.

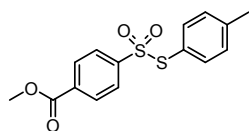

**4na**

**methyl 4-(p-tolylthiosulfonyl)benzoate** White solid, mp, 96 - 97 °C.  $^1\text{H}$  NMR (400 MHz,  $\text{CDCl}_3$ ):  $\delta$  8.07 (d,  $J = 8.2$  Hz, 2H), 7.62 (d,  $J = 8.3$  Hz, 2H), 7.21 (d,  $J = 8.1$  Hz, 2H), 7.14 (d,  $J = 7.9$  Hz, 2H), 3.96 (s, 3H), 1.39 (s, 3H);  $^{13}\text{C}$  NMR (100 MHz,  $\text{CDCl}_3$ ):  $\delta$  165.5, 146.5, 142.6, 136.5, 134.4, 130.5, 130.0, 127.6, 123.9, 52.8, 21.5. ESI HRMS: calculated for  $\text{C}_{15}\text{H}_{14}\text{NaO}_4\text{S}_2$   $[\text{M}+\text{Na}]^+$  345.0231, found 345.0220.

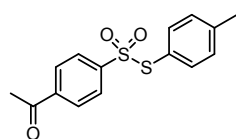

**4oa**

**S-p-tolyl 4-acetylbenzenesulfonothioate** White solid, mp, 79 - 80 °C.  $^1\text{H}$  NMR (400 MHz,  $\text{CDCl}_3$ ):  $\delta$  7.97 (d,  $J = 8.5$  Hz, 2H), 7.65 (d,  $J = 8.5$  Hz, 2H), 7.23 (d,  $J = 8.1$  Hz, 2H), 7.15 (d,  $J = 8.1$  Hz, 2H), 2.64 (s, 3H), 2.38 (s, 3H).  $^{13}\text{C}$  NMR ( $\text{CDCl}_3$ , 100 MHz, ppm)  $\delta$  196.7, 146.5, 142.6, 140.4, 136.4, 130.5, 128.7, 127.8, 123.9, 27.0, 21.5. ESI HRMS: calculated for  $\text{C}_{15}\text{H}_{15}\text{O}_3\text{S}_2$   $[\text{M}+\text{H}]^+$  307.0463, found 307.0428.

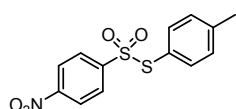

**4pa**

**S-p-tolyl 4-nitrobenzenesulfonothioate** White solid, mp, 137 - 138 °C.  $^1\text{H}$  NMR (400 MHz,  $\text{CDCl}_3$ ):  $\delta$  8.27 (d,  $J = 8.8$  Hz, 2H), 7.73 (d,  $J = 8.5$  Hz, 2H), 7.24 (d,  $J = 8.0$  Hz, 2H), 7.18 (d,  $J = 8.0$  Hz, 2H), 2.40 (s, 3H).  $^{13}\text{C}$  NMR ( $\text{CDCl}_3$ , 100 MHz, ppm)  $\delta$  150.3, 148.0, 143.0, 136.4, 130.7, 128.8, 124.1, 123.4, 21.6. MS (ESI); ESI HRMS: calculated for  $\text{C}_{13}\text{H}_{11}\text{NNaO}_4\text{S}_2$   $[\text{M}+\text{Na}]^+$  332.0027, found 332.0022.

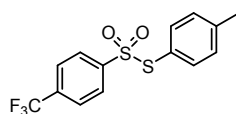

**4qa**

**S-p-tolyl 4-(trifluoromethyl)benzenesulfonothioate** White solid, mp, 85 - 86 °C.  $^1\text{H}$  NMR (400 MHz,  $\text{CDCl}_3$ ):  $\delta$  7.70 (s, 4H), 7.24 (d,  $J = 8.2$  Hz, 2H), 7.17 (d,  $J = 8.1$  Hz, 2H), 2.39 (s, 3H);  $^{13}\text{C}$  NMR (100 MHz,  $\text{CDCl}_3$ ):  $\delta$  146.2, 142.7, 136.5, 135.1 (q,  $J = 32.9$  Hz), 130.5, 128.0, 126.0 (q,  $J = 3.7$  Hz), 123.8, 123.1 (q,  $J = 271.5$  Hz), 21.5. ESI HRMS: calculated for  $\text{C}_{14}\text{H}_{11}\text{F}_3\text{NaO}_2\text{S}_2$   $[\text{M}+\text{Na}]^+$  355.0050, found 355.0010.

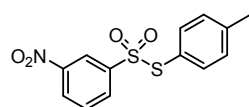

**4ra**

**S-p-tolyl 3-nitrobenzenesulfonothioate** White solid, mp, 102 - 103 °C.  $^1\text{H}$  NMR (400 MHz,  $\text{CDCl}_3$ ):  $\delta$  8.43-8.41 (m, 1H), 8.27 (t,  $J = 1.9$  Hz, 2H), 7.90 (d,  $J = 7.9$  Hz,

1H), 7.67 (t,  $J = 7.9$  Hz, 1H), 7.23 (d,  $J = 8.2$  Hz, 2H), 7.17 (d,  $J = 8.2$  Hz, 2H), 2.39 (s, 3H);  $^{13}\text{C}$  NMR (100 MHz,  $\text{CDCl}_3$ ):  $\delta$  147.9, 144.6, 143.2, 136.4, 132.7, 130.7, 130.3, 127.9, 123.5, 122.9, 21.5. ESI HRMS: calculated for  $\text{C}_{13}\text{H}_{11}\text{NNaO}_4\text{S}_2$   $[\text{M}+\text{Na}]^+$  332.0027, found 332.0012.

## 5. Copies of NMR spectra

### 4aa

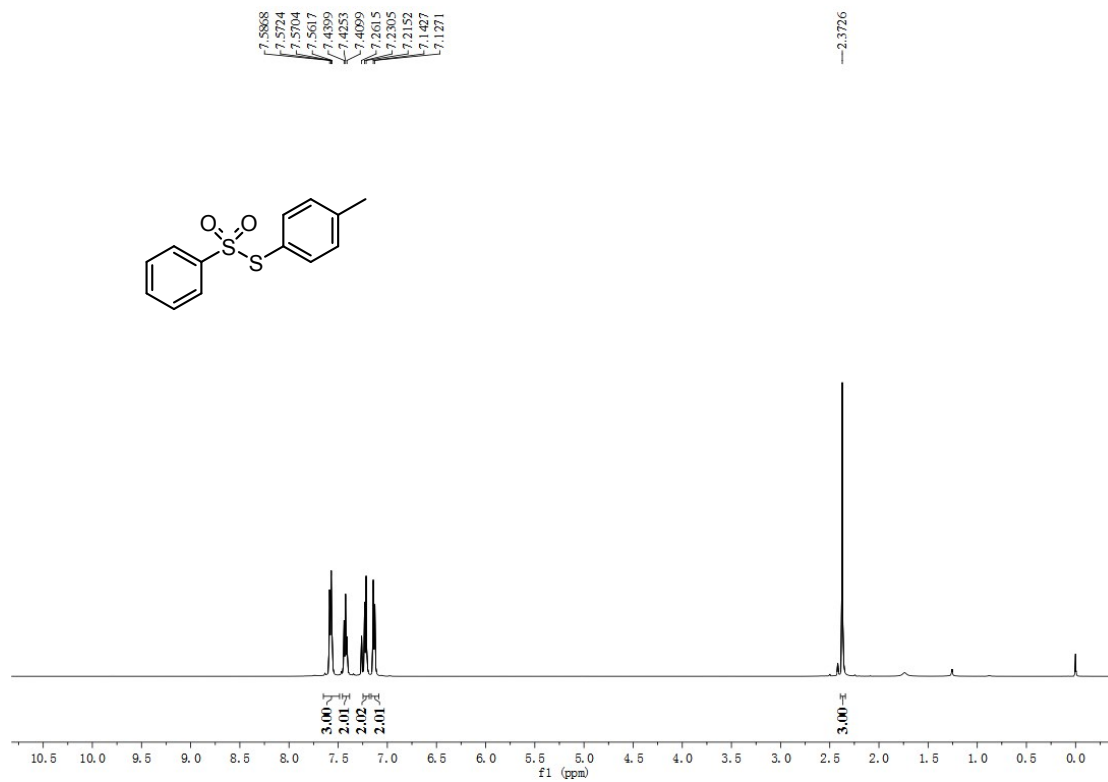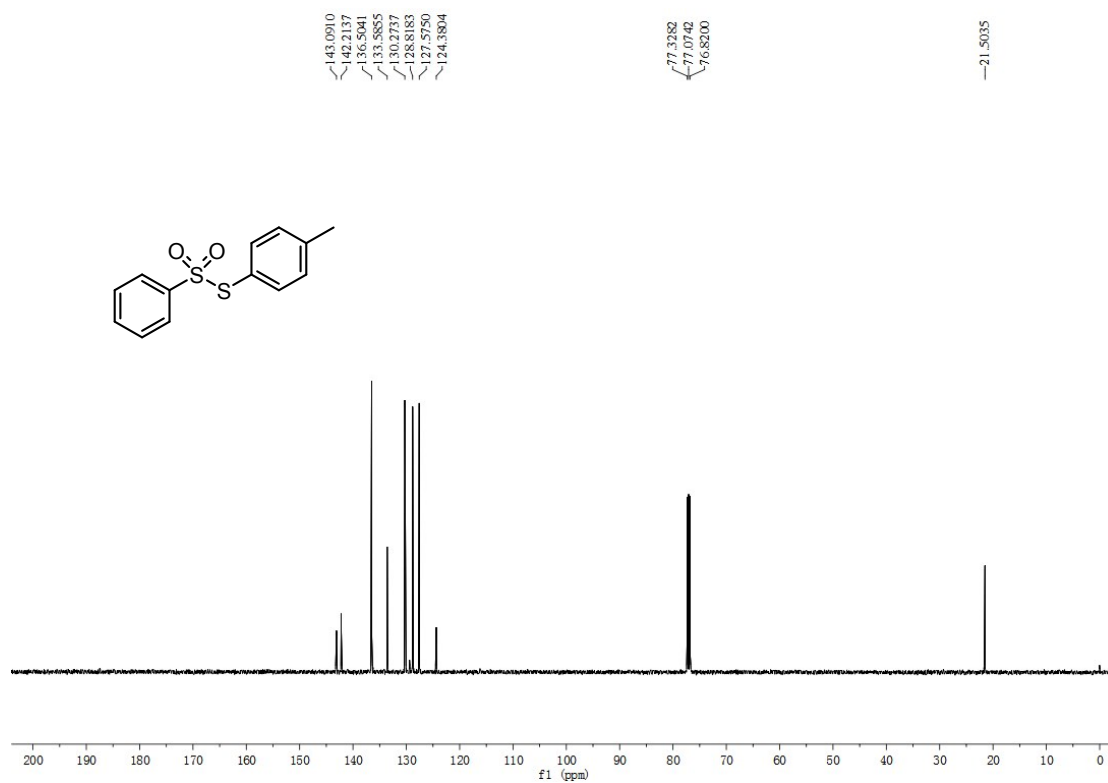

4ab

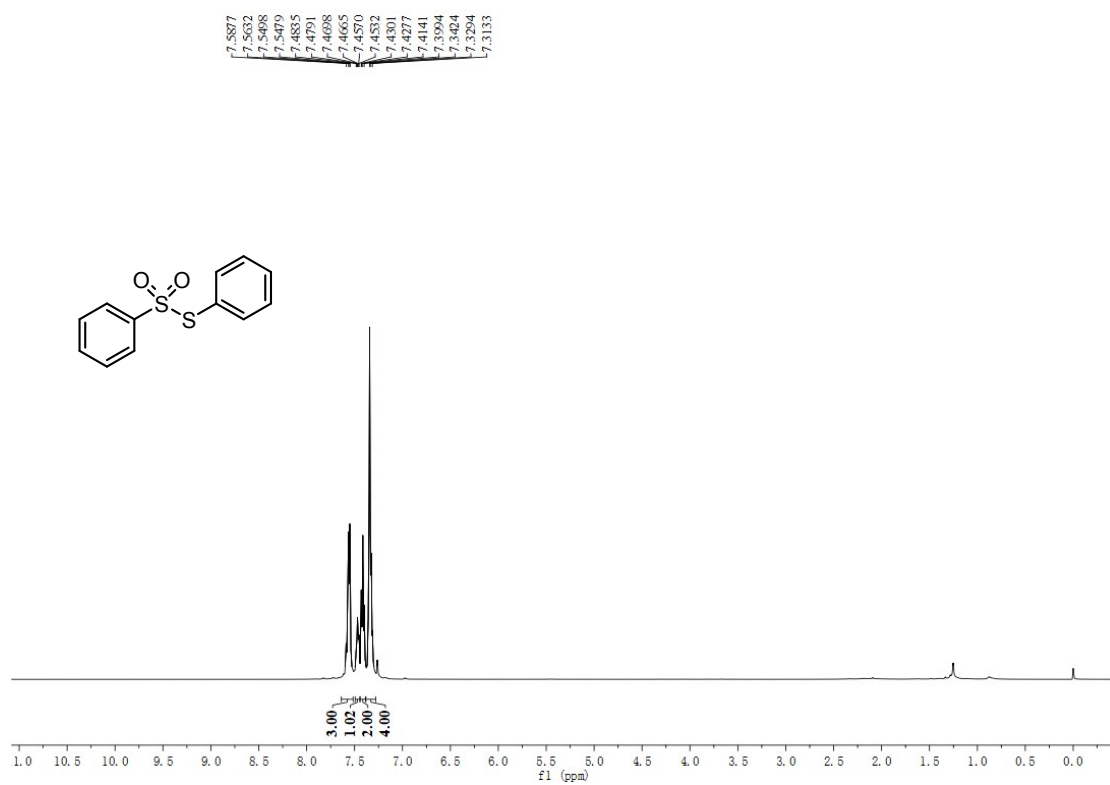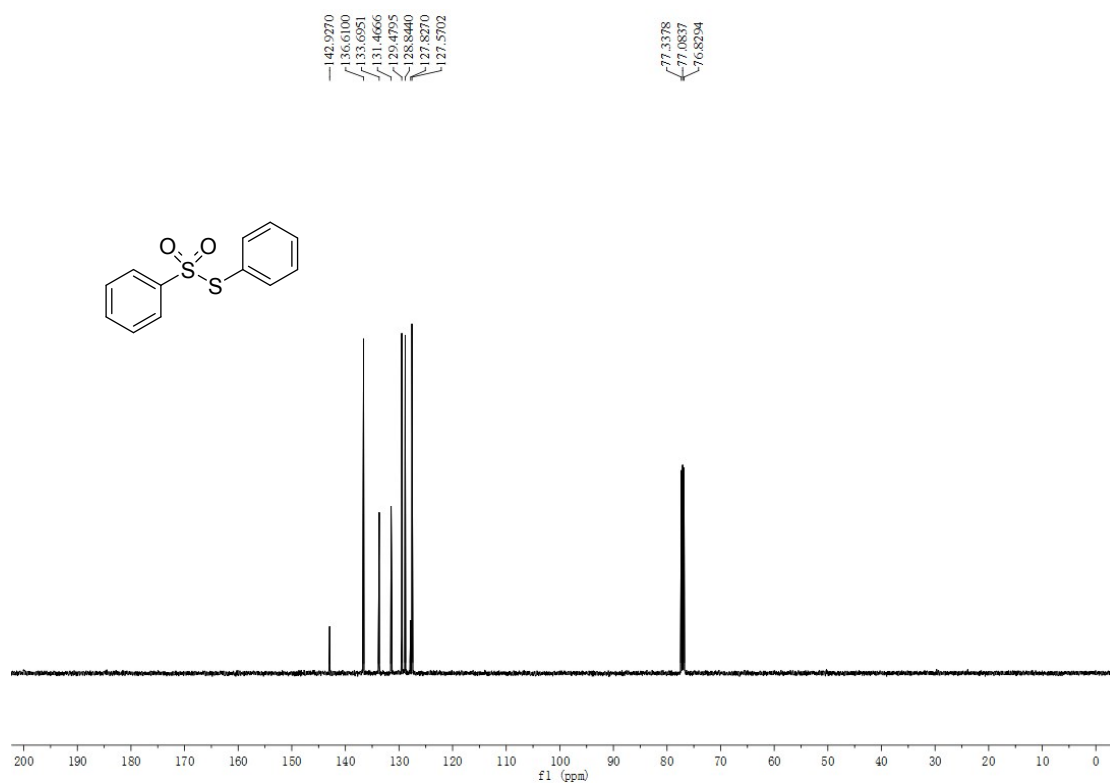

4ac

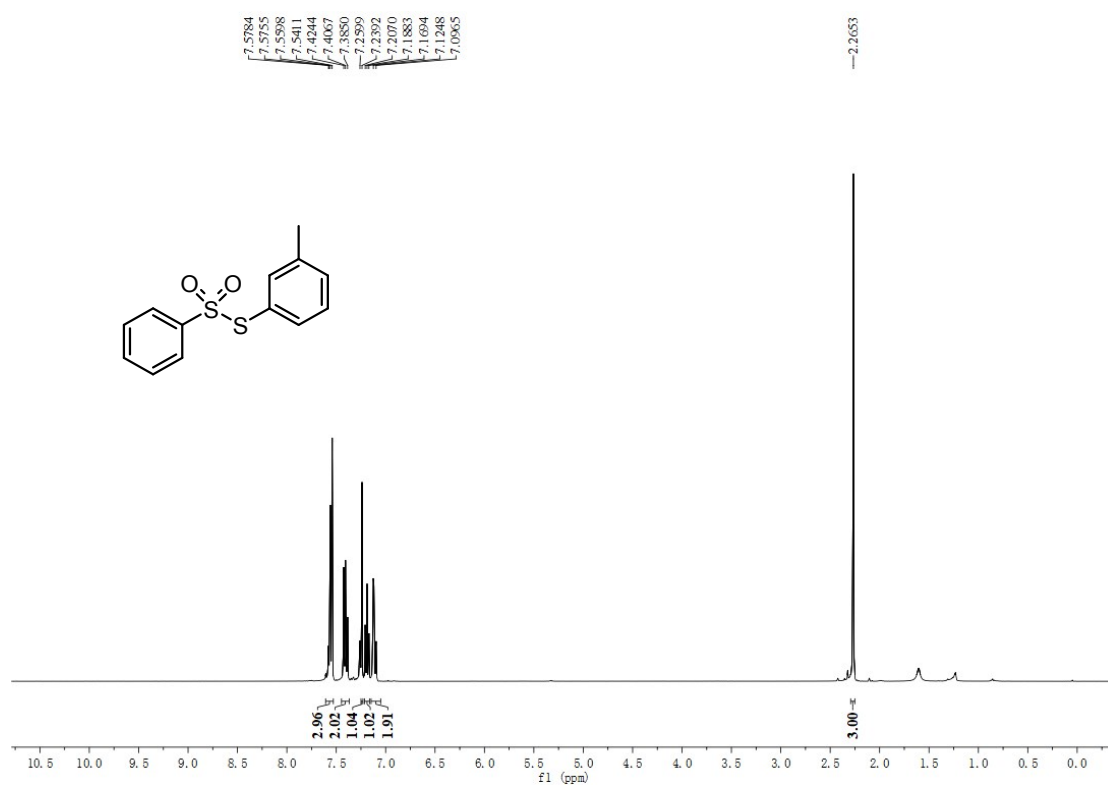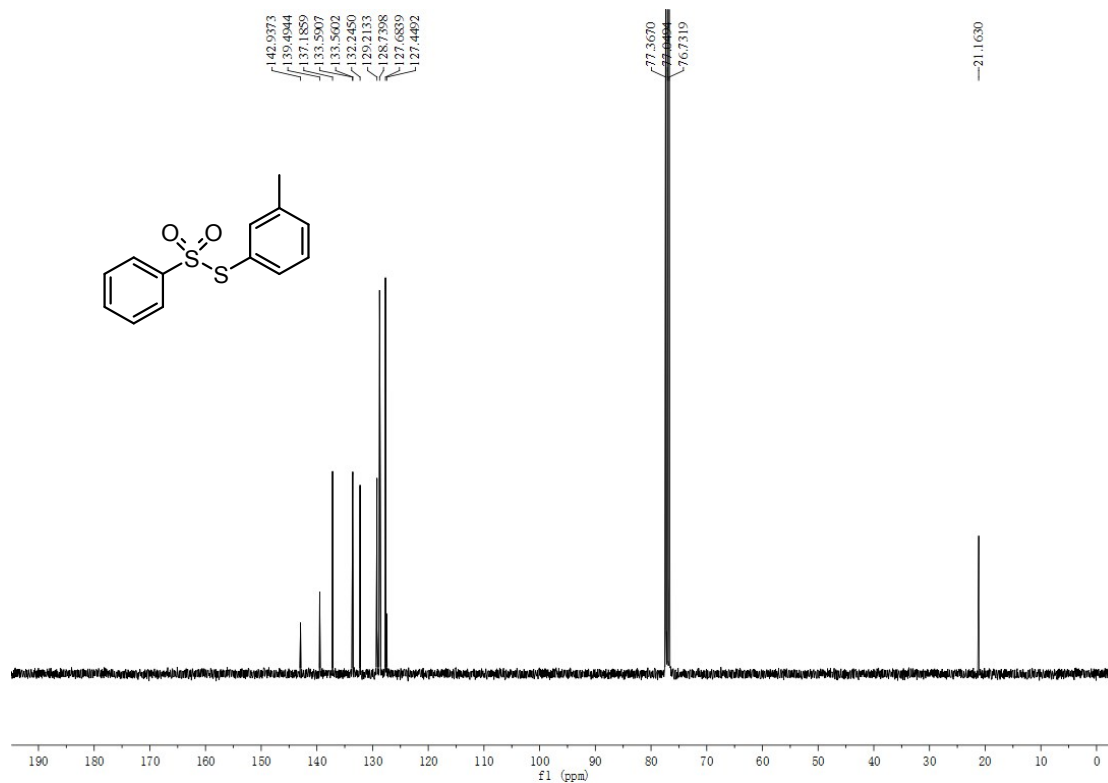



4ad

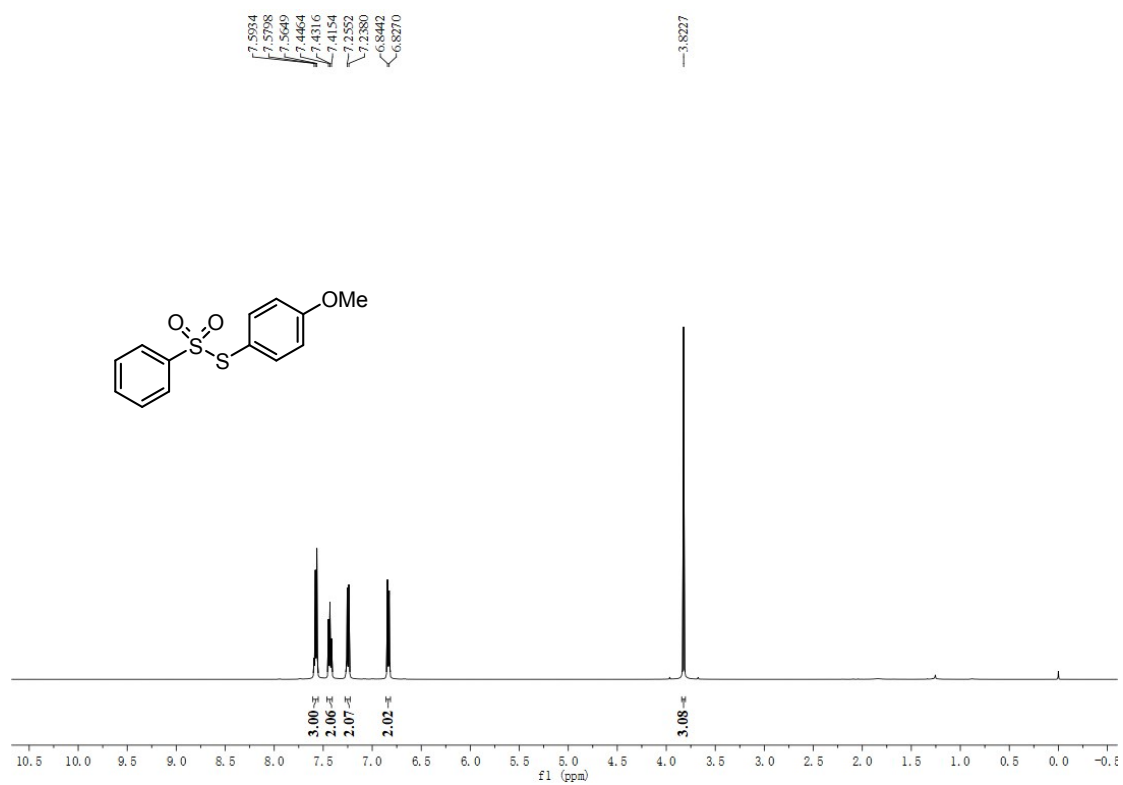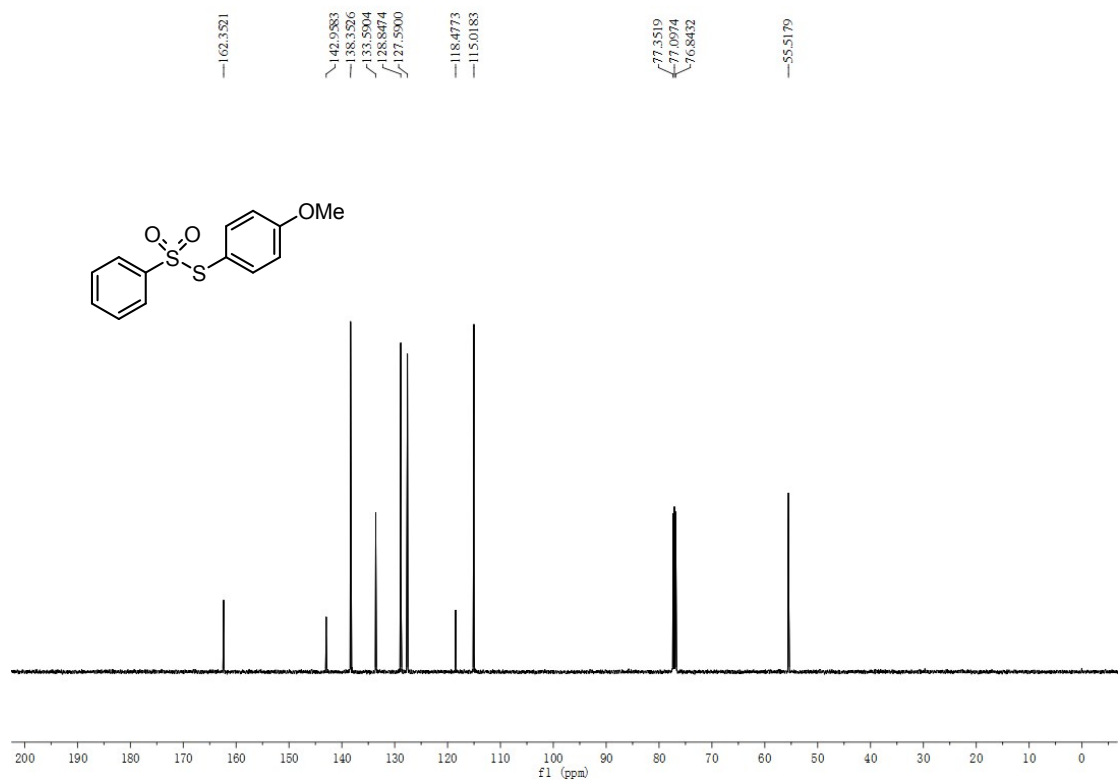

4ae

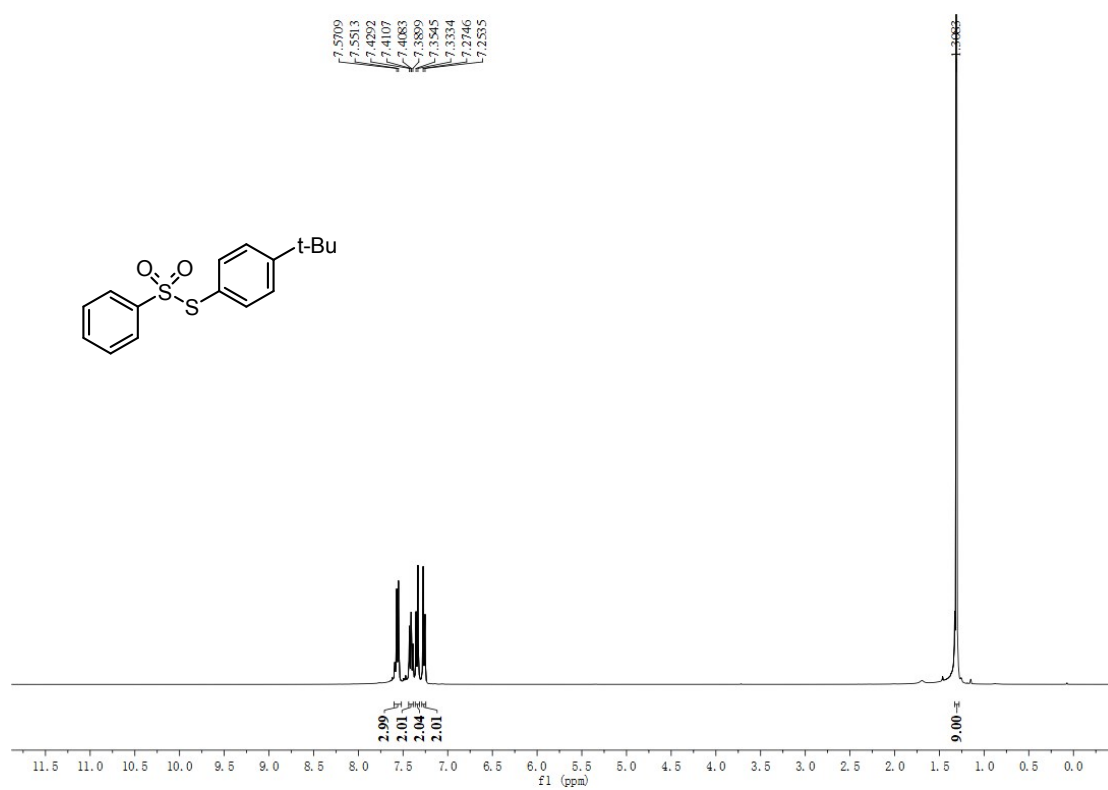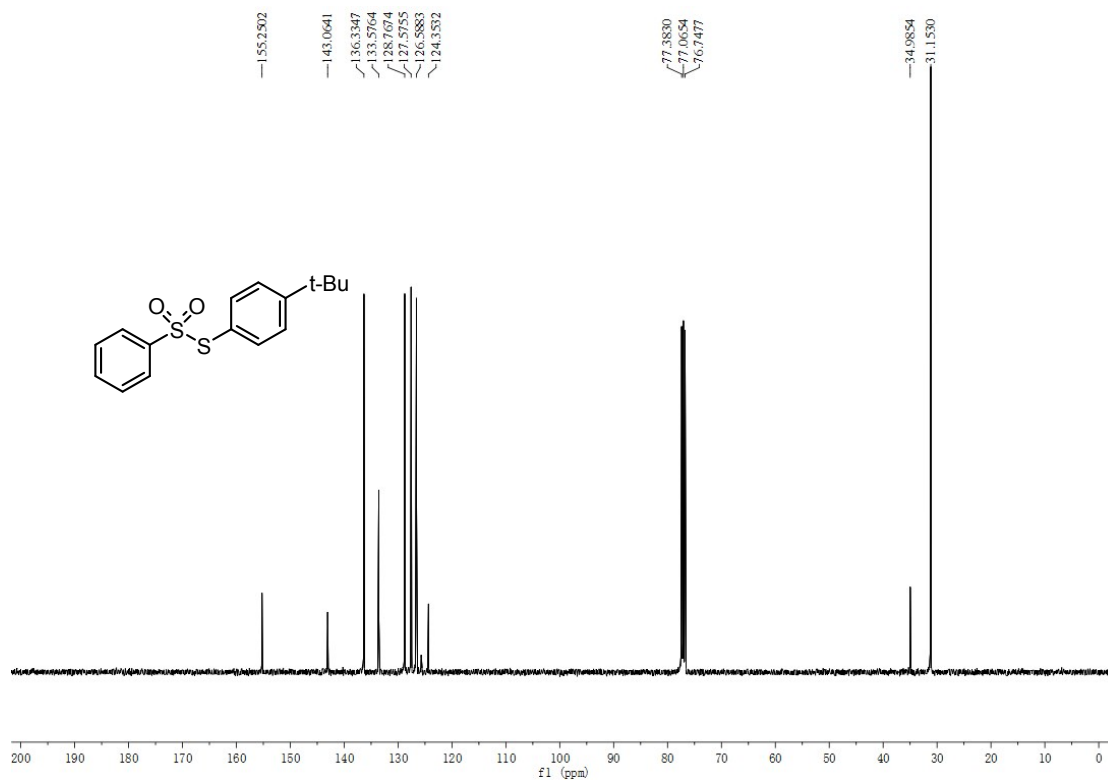

4af

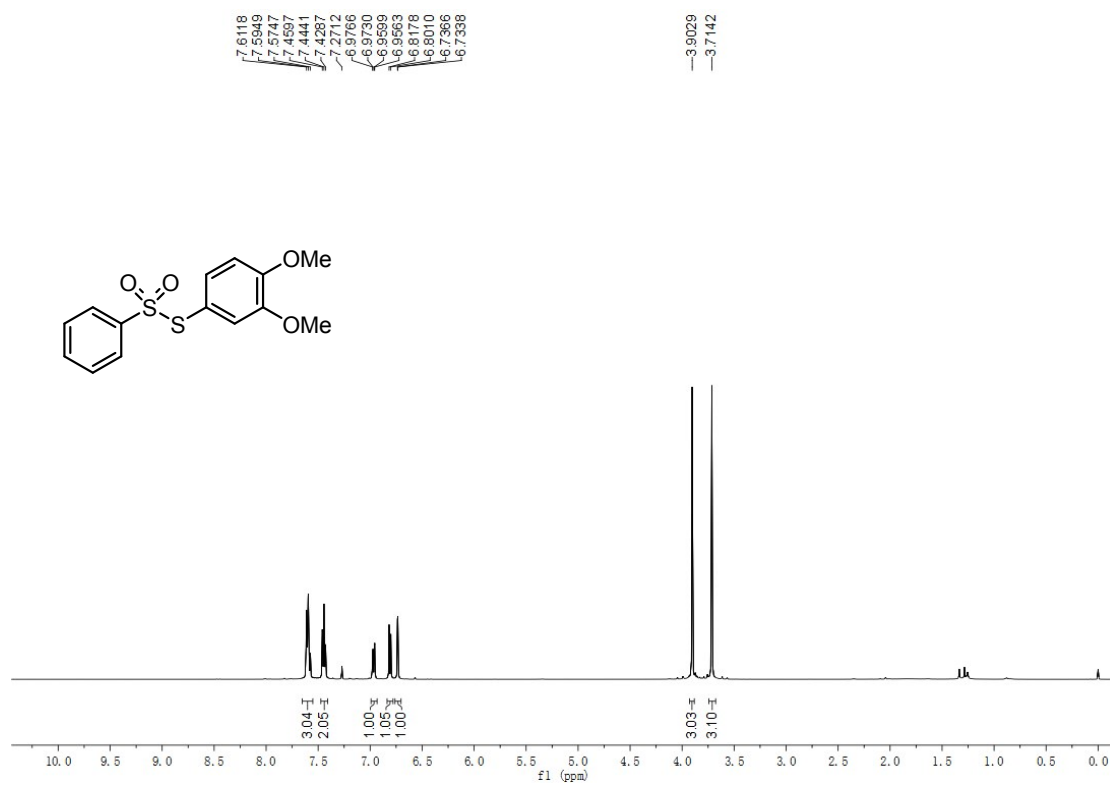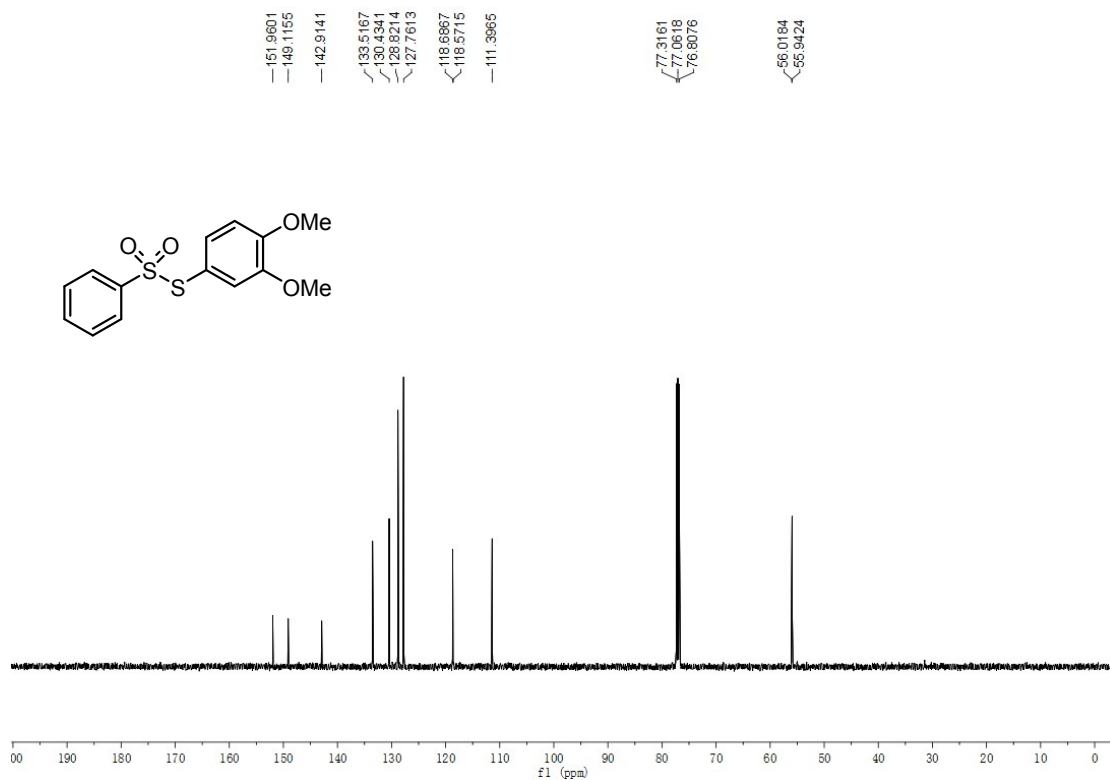

4ag

7.6162  
7.6134  
7.5977  
7.5860  
7.5769  
7.5725  
7.5675  
7.4656  
7.4471  
7.4306  
7.4265  
7.3559  
7.3307  
7.3428  
7.3393  
7.3338  
7.3260  
7.3207  
7.2599  
7.0527  
7.0313  
7.0098

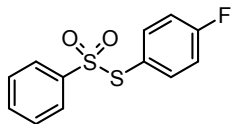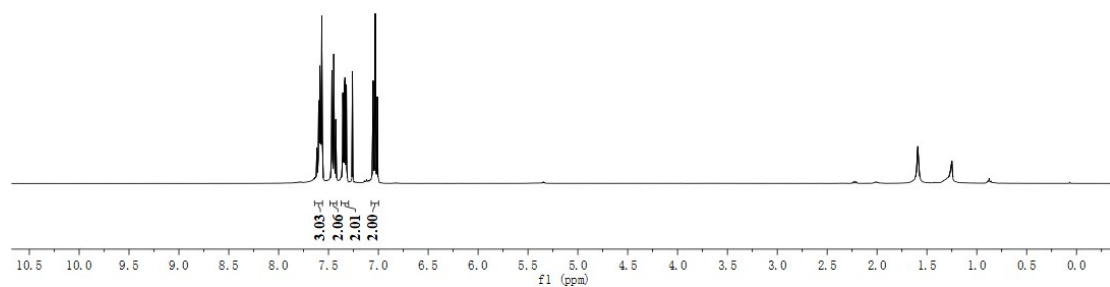

166.0964  
163.5718  
142.7369  
138.9103  
138.8196  
133.8274  
138.9383  
127.6018  
133.4233  
123.3900  
116.7226

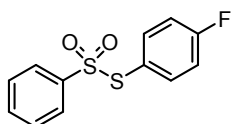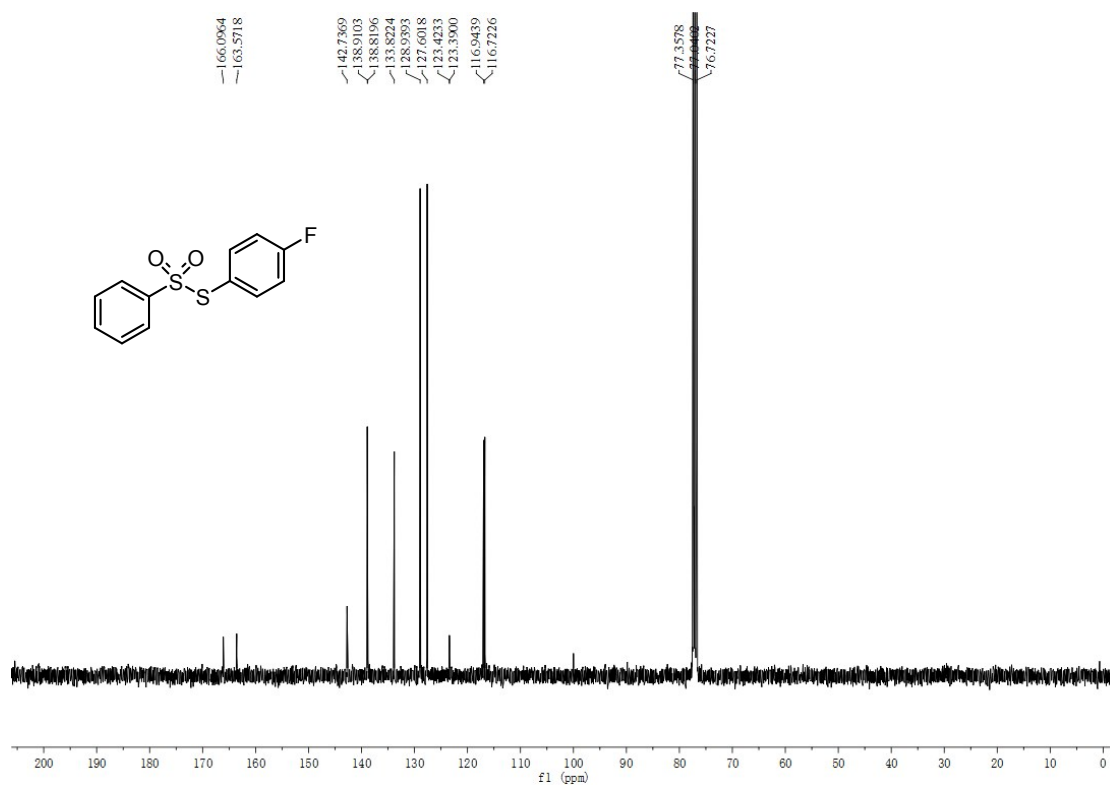

4ah

7.6218  
7.6053  
7.5884  
7.5820  
7.5774  
7.4734  
7.4549  
7.4343  
7.3291  
7.3236  
7.3130  
7.3074  
7.2881  
7.2823  
7.2716  
7.2666  
7.2596

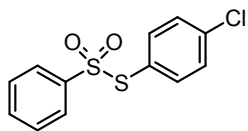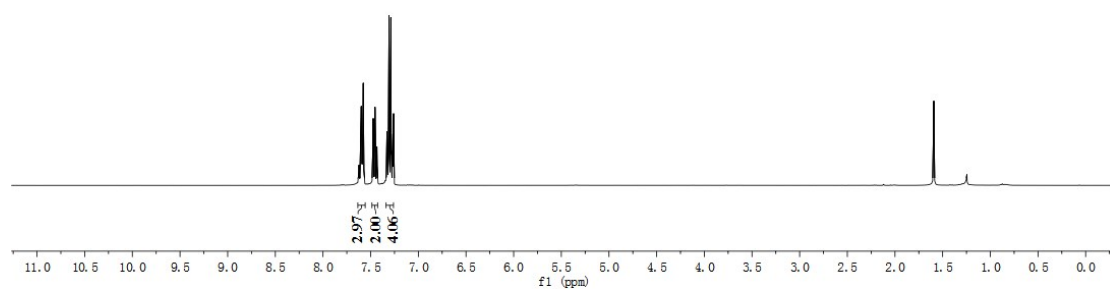

142.8023  
138.3363  
137.7566  
133.9075  
129.7922  
128.9972  
127.5866  
126.3009

77.3747  
77.0571  
76.7395

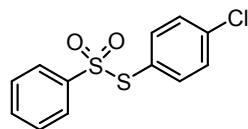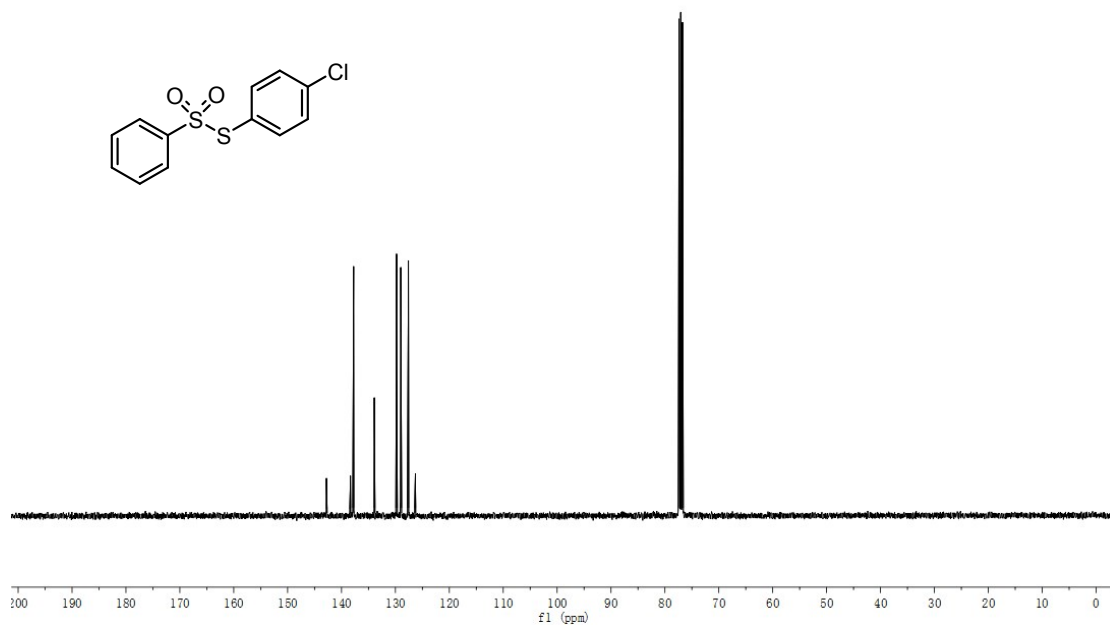

4ai

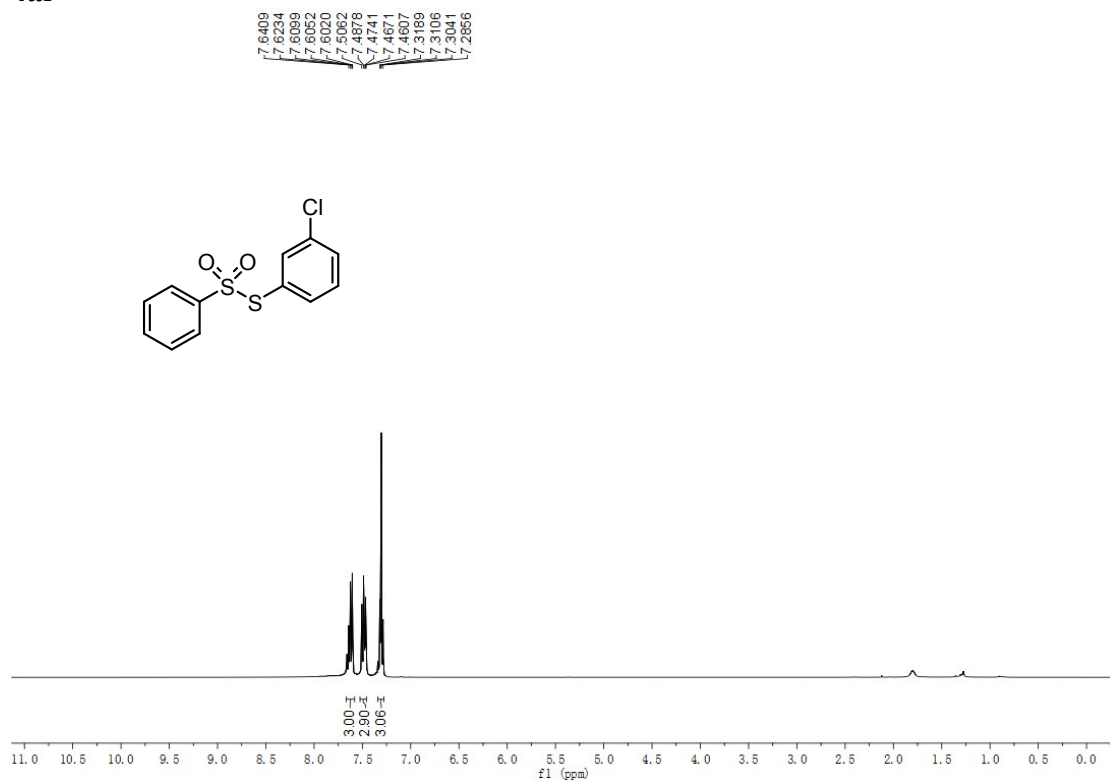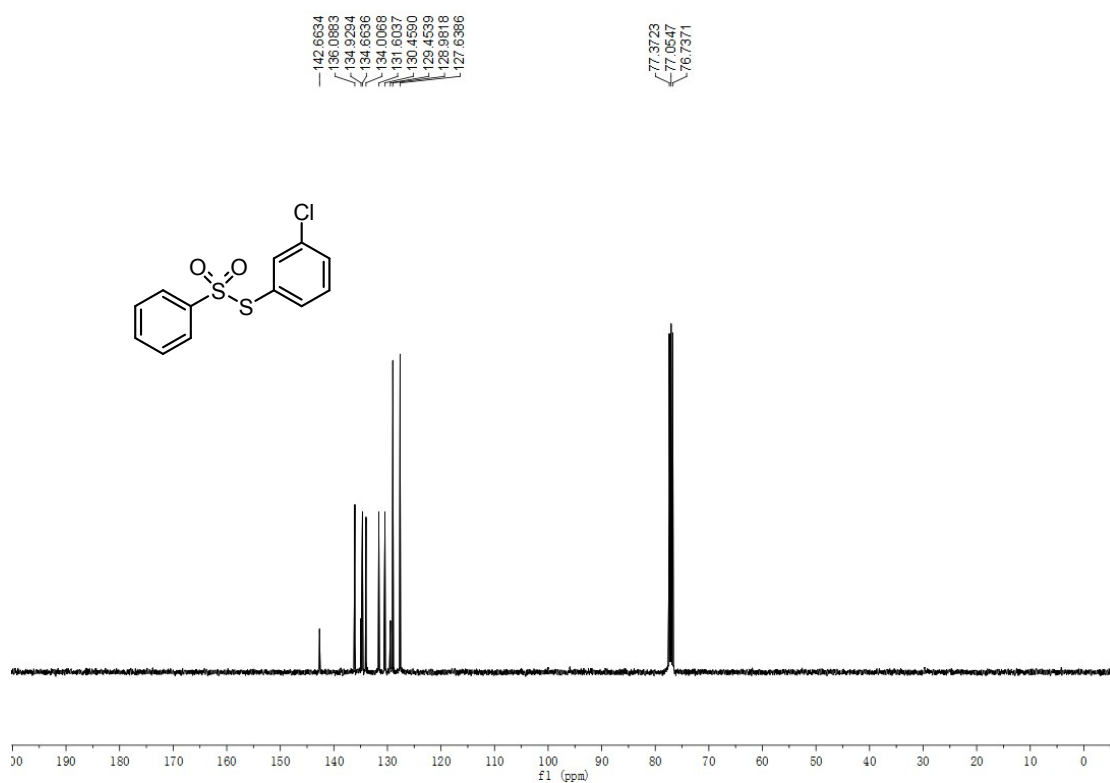

4aj

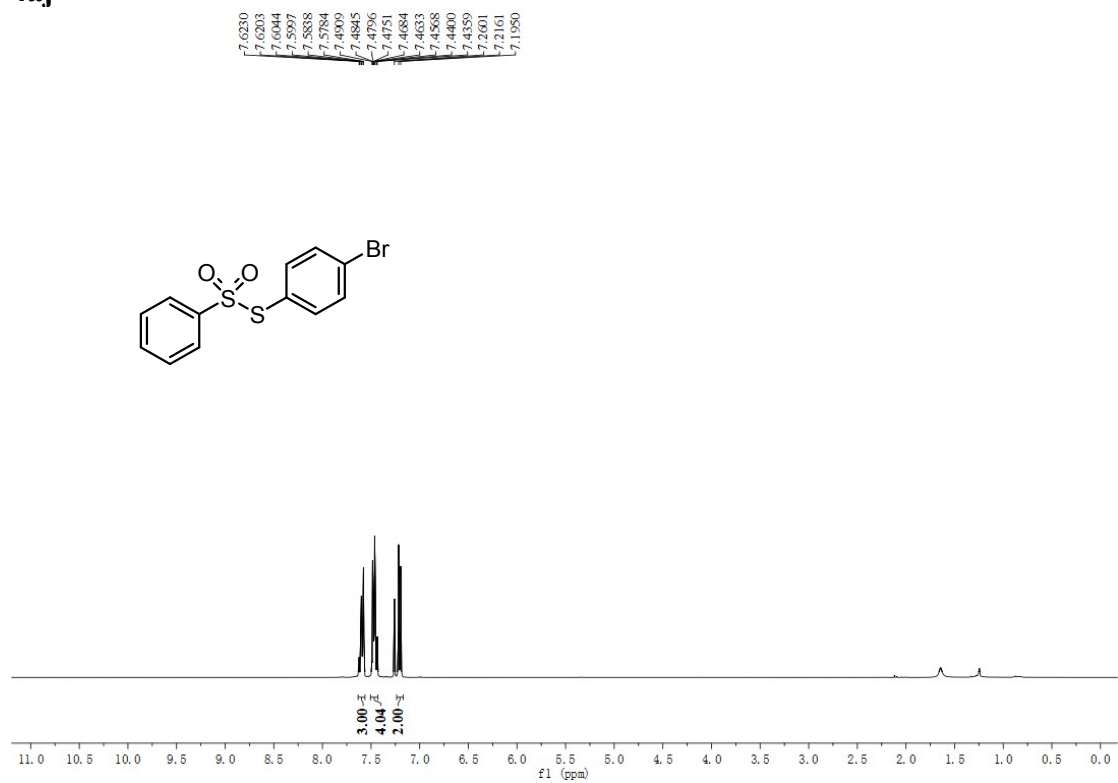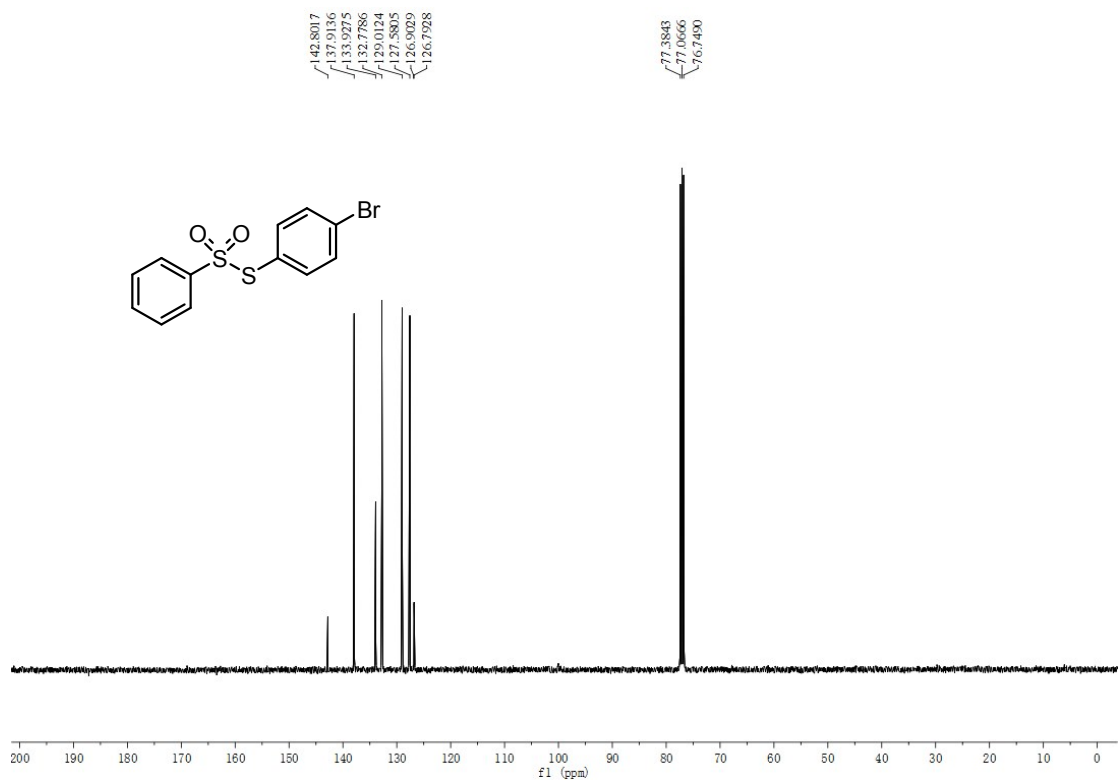

4ak

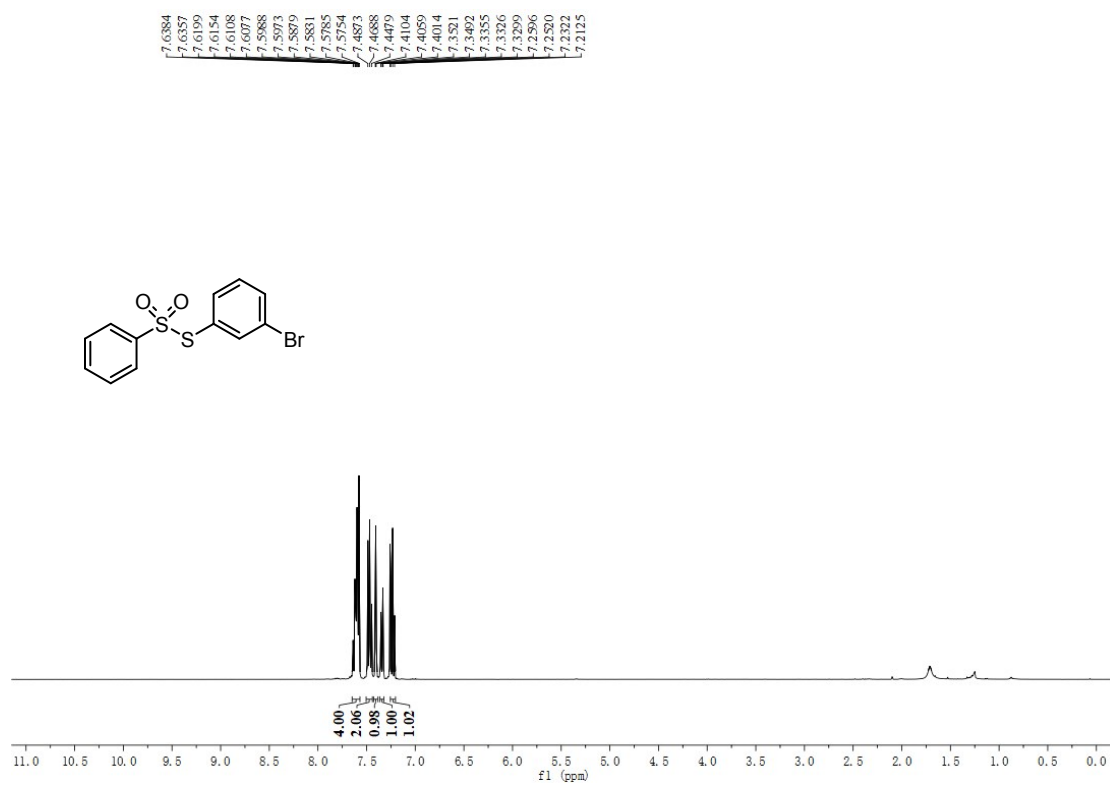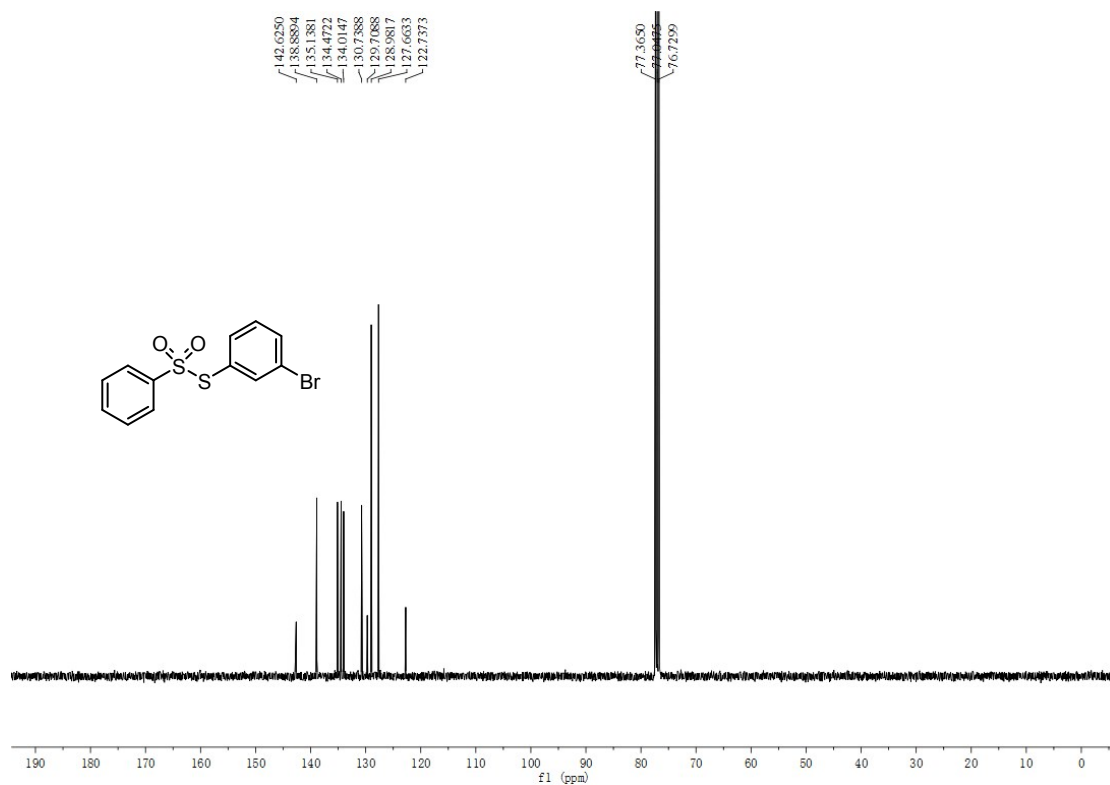



4al

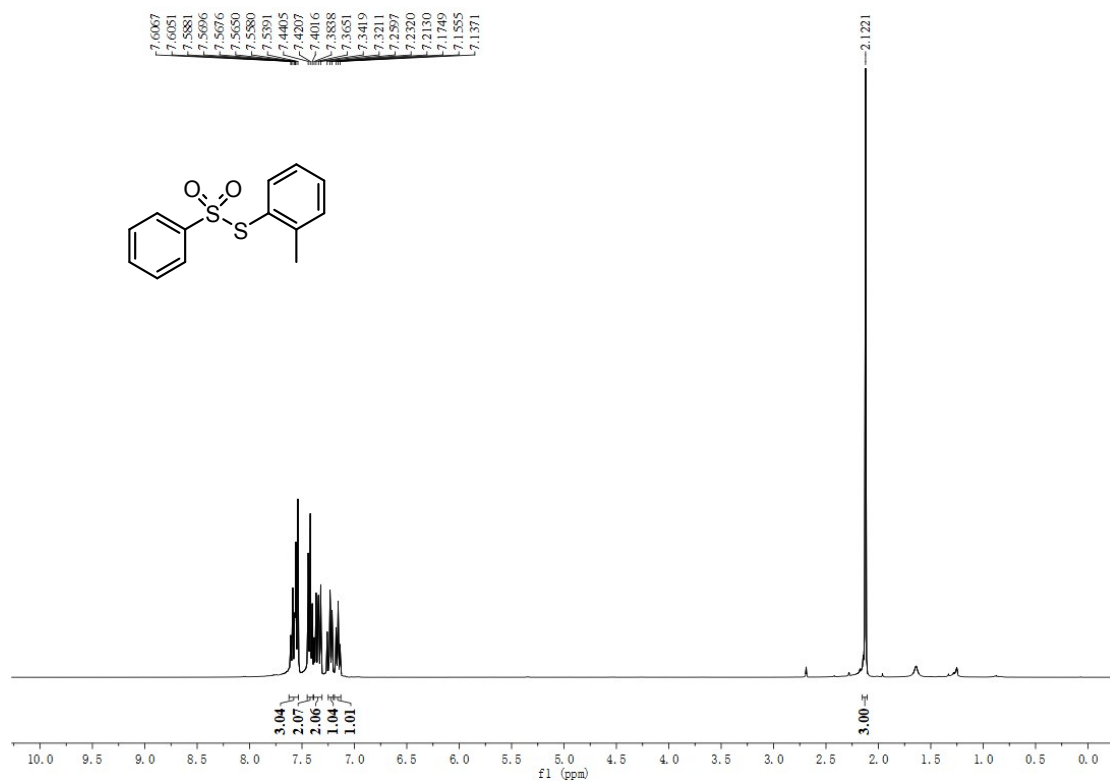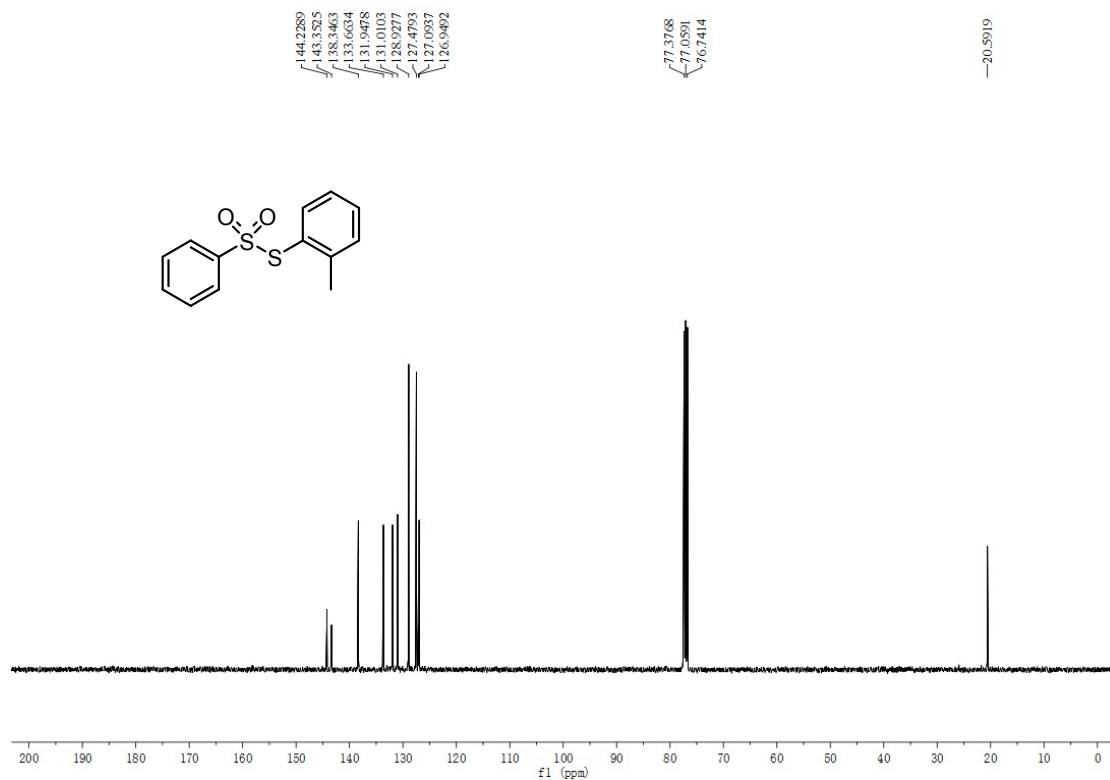

# 4am

7.6821  
7.6781  
7.6627  
7.6388  
7.6182  
7.5996  
7.5929  
7.5908  
7.5784  
7.5720  
7.4470  
7.4421  
7.4361  
7.4285  
7.4259  
7.4159  
7.4121  
7.4076  
7.3946  
7.3985  
7.3827  
7.3784  
7.3627  
7.3583  
7.3553  
7.3309  
7.3166  
7.3126  
7.2985  
7.2940  
7.2601

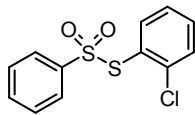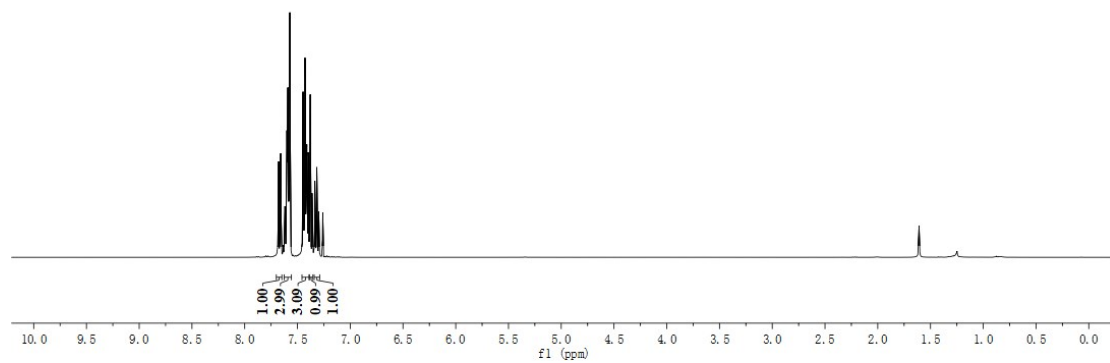

143.4370  
140.3204  
139.6342  
133.9657  
133.0189  
130.3442  
129.0564  
127.542  
127.5038  
126.9897

77.3964  
77.0785  
76.7609

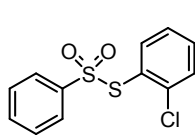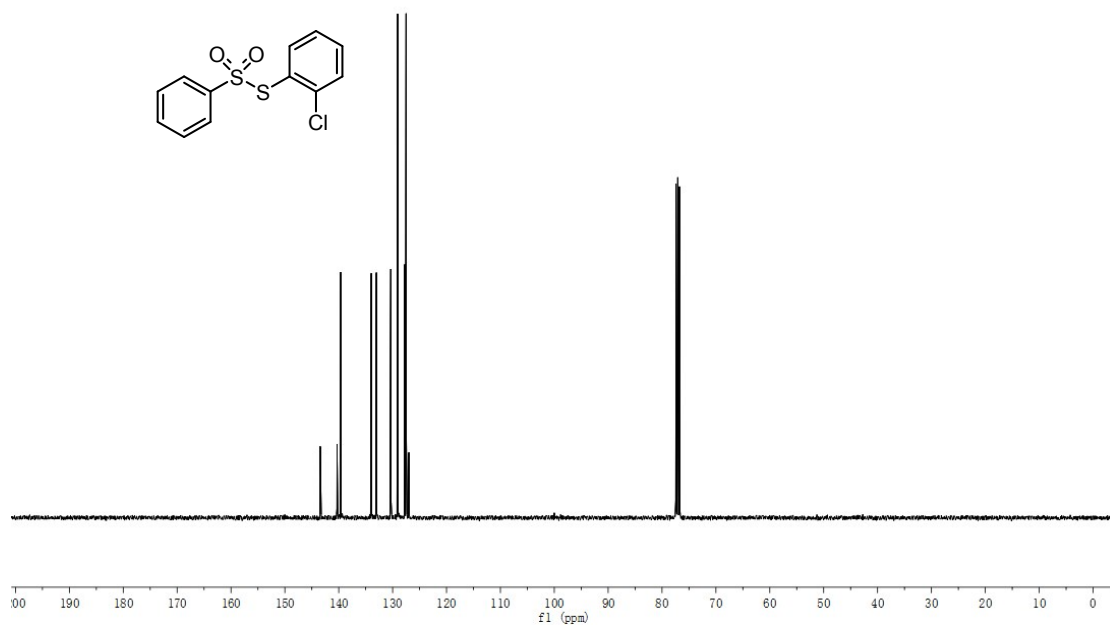

# 4an

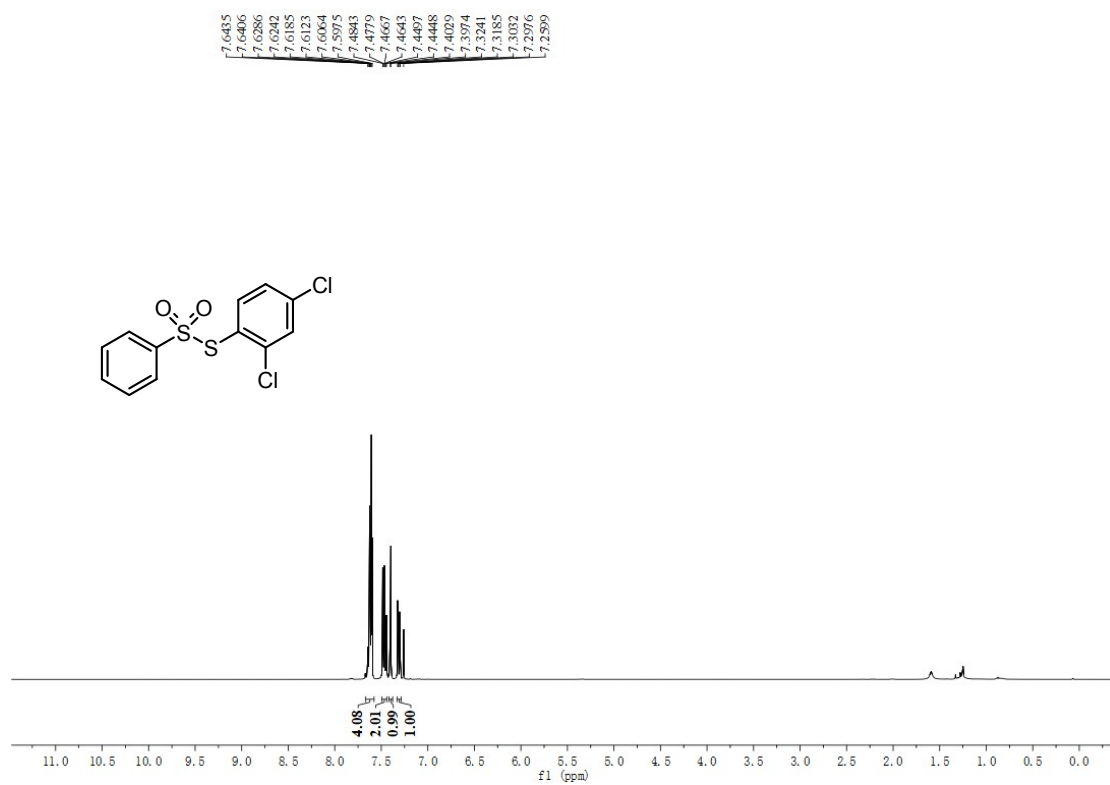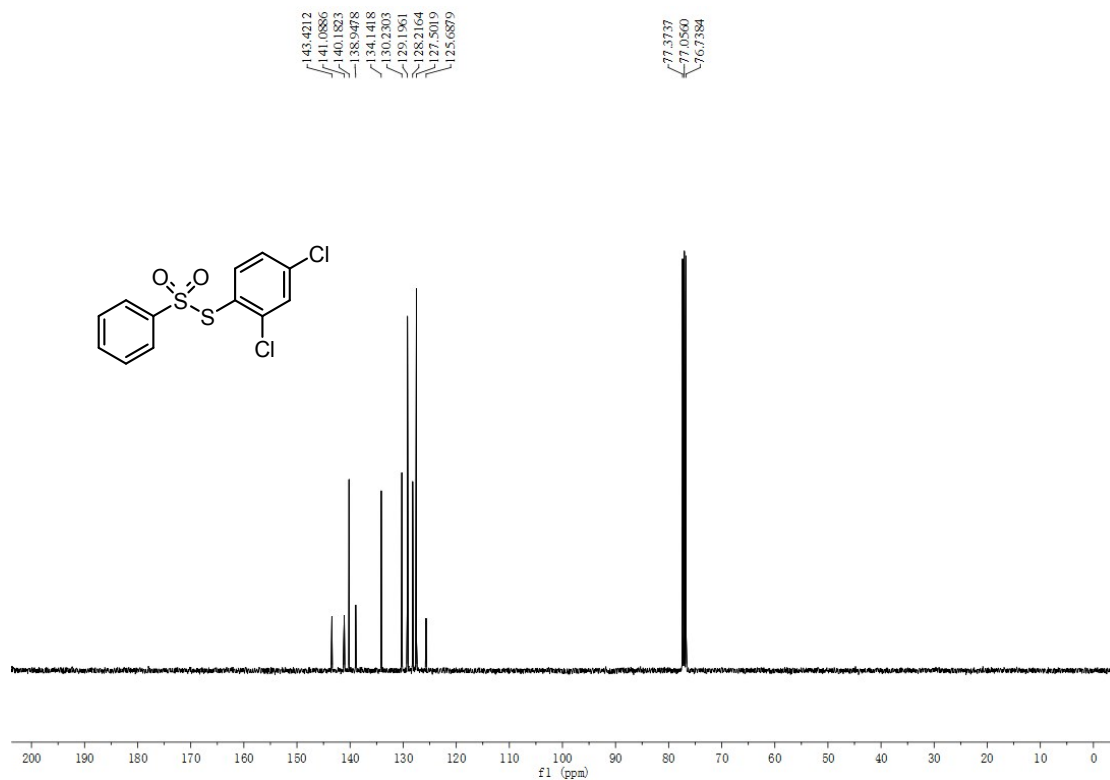

4ao

7.8668  
7.8473  
7.8024  
7.7810  
7.7513  
7.7315  
7.6125  
7.6099  
7.5953  
7.5927  
7.5890  
7.5853  
7.5824  
7.5755  
7.5716  
7.5667  
7.5624  
7.5599  
7.5552  
7.5515  
7.5460  
7.5409  
7.5172  
7.5149  
7.3976  
7.3956  
7.3907  
7.3794  
7.3763  
7.3692  
7.3628  
7.3385  
7.2999

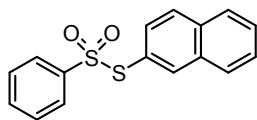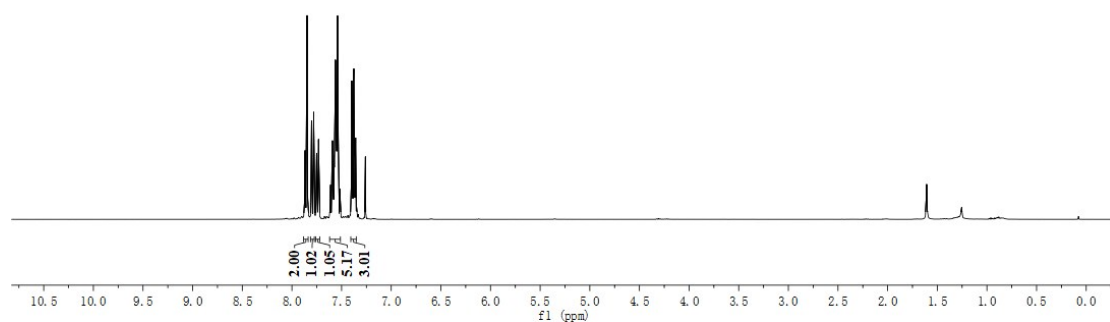

142.9345  
137.6689  
134.1086  
133.7008  
133.2924  
131.8381  
129.2113  
128.8803  
128.4609  
128.3117  
127.8193  
127.6244  
127.0096  
124.9321

77.3955  
77.0778  
76.7601

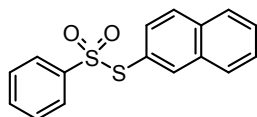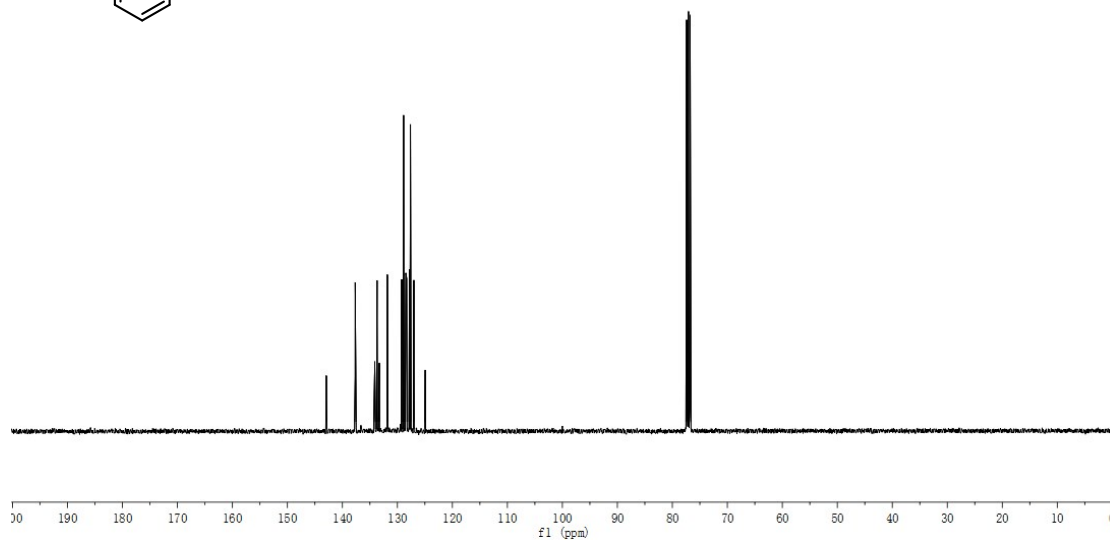

4ap

7.6882  
7.68718  
7.7481  
7.7341  
7.6554  
7.6394  
7.5345  
7.5329  
7.5260  
7.5194  
7.5147  
7.5055  
7.4922  
7.4765  
7.4634  
7.4170  
7.4024  
7.3861  
7.2780  
7.2635  
7.2545  
7.2476

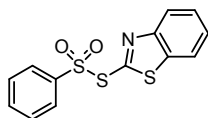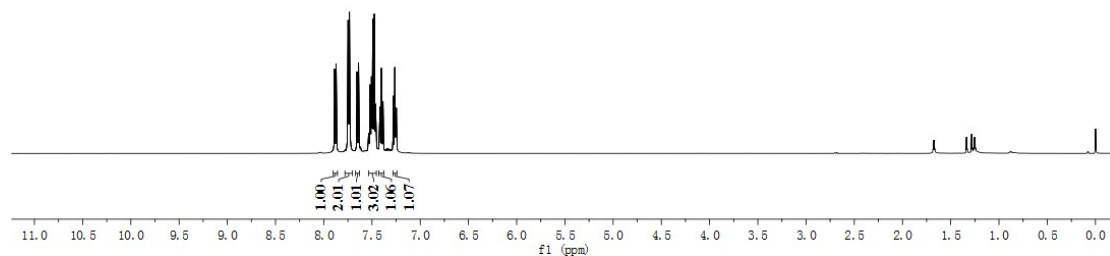

169.7090  
153.9561  
135.5650  
135.4279  
30.5290  
29.9760  
26.2064  
24.3026  
21.9862  
20.8271  
77.3271  
77.0729  
76.8188

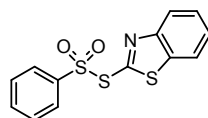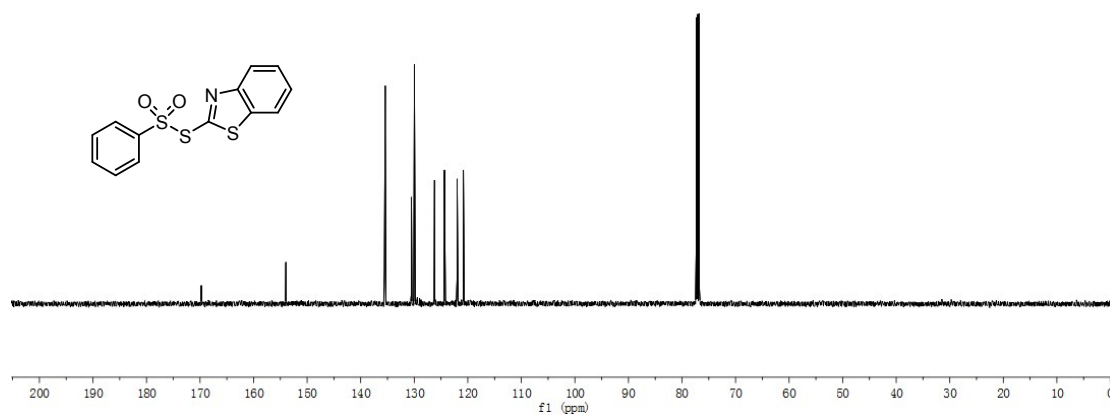

4aq

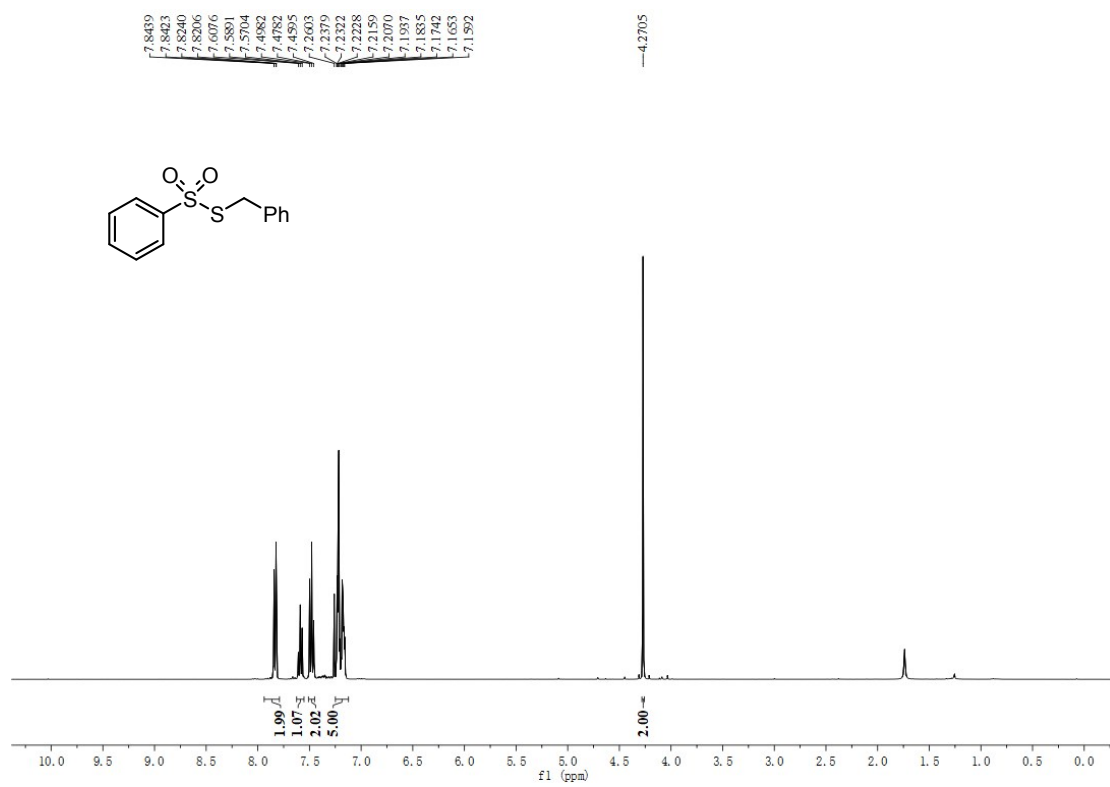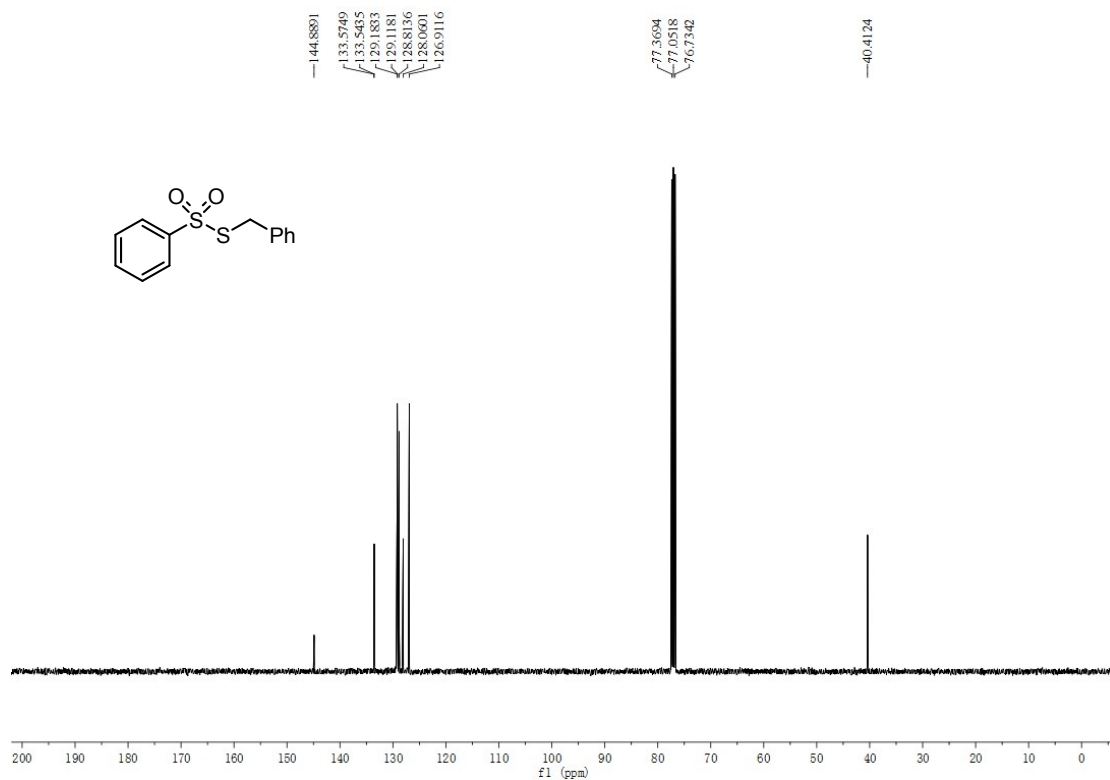

4ar

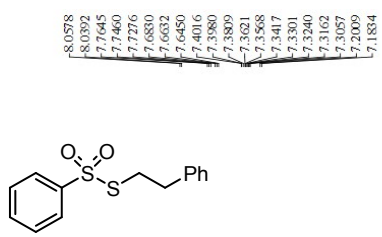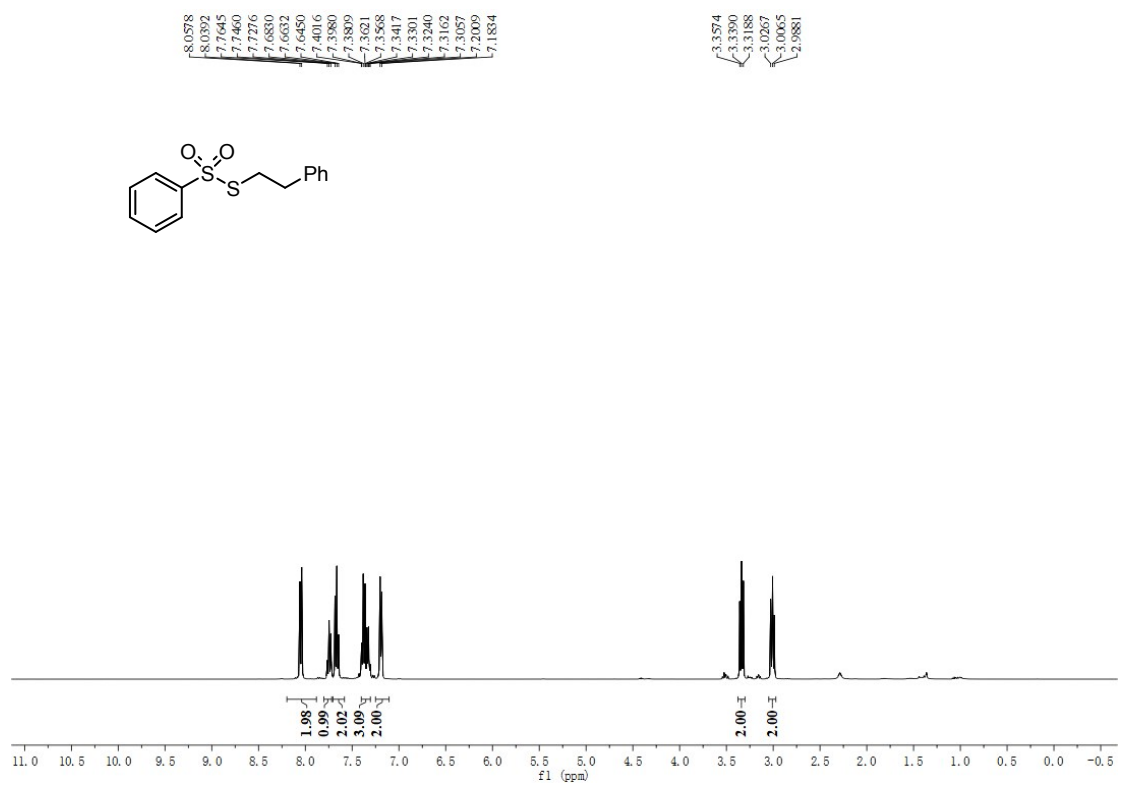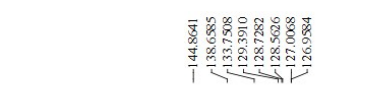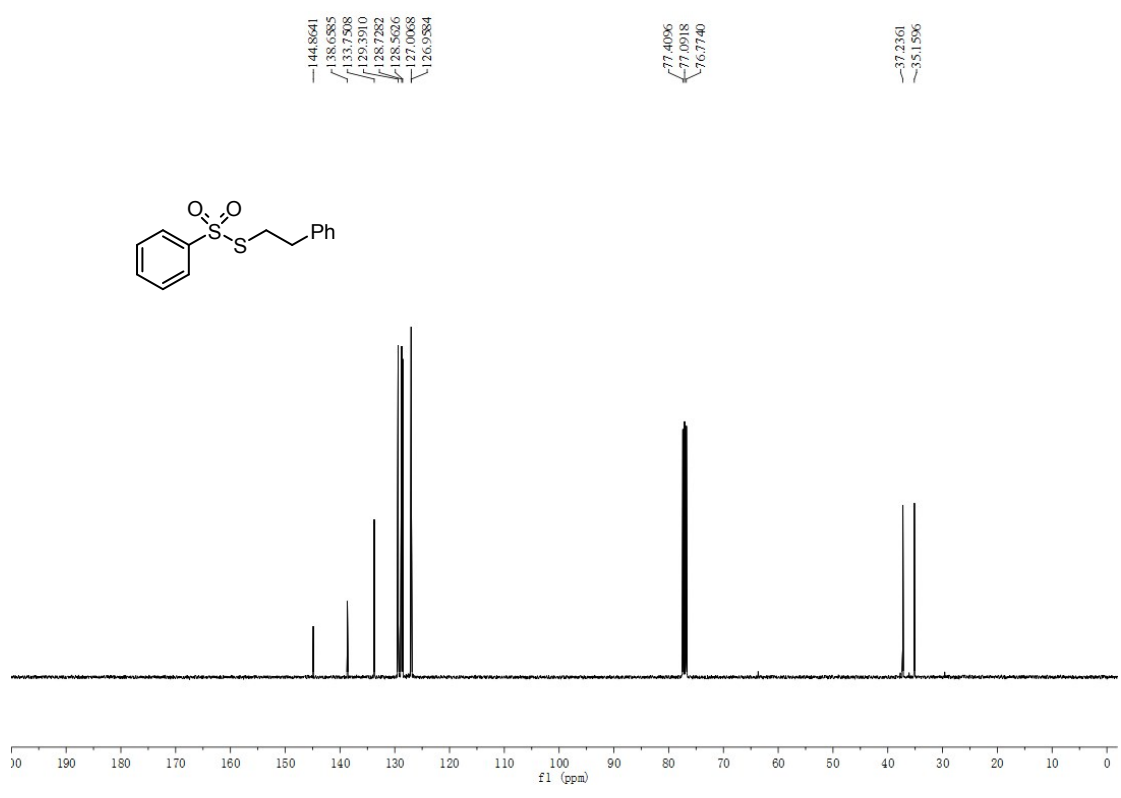

# 4ba

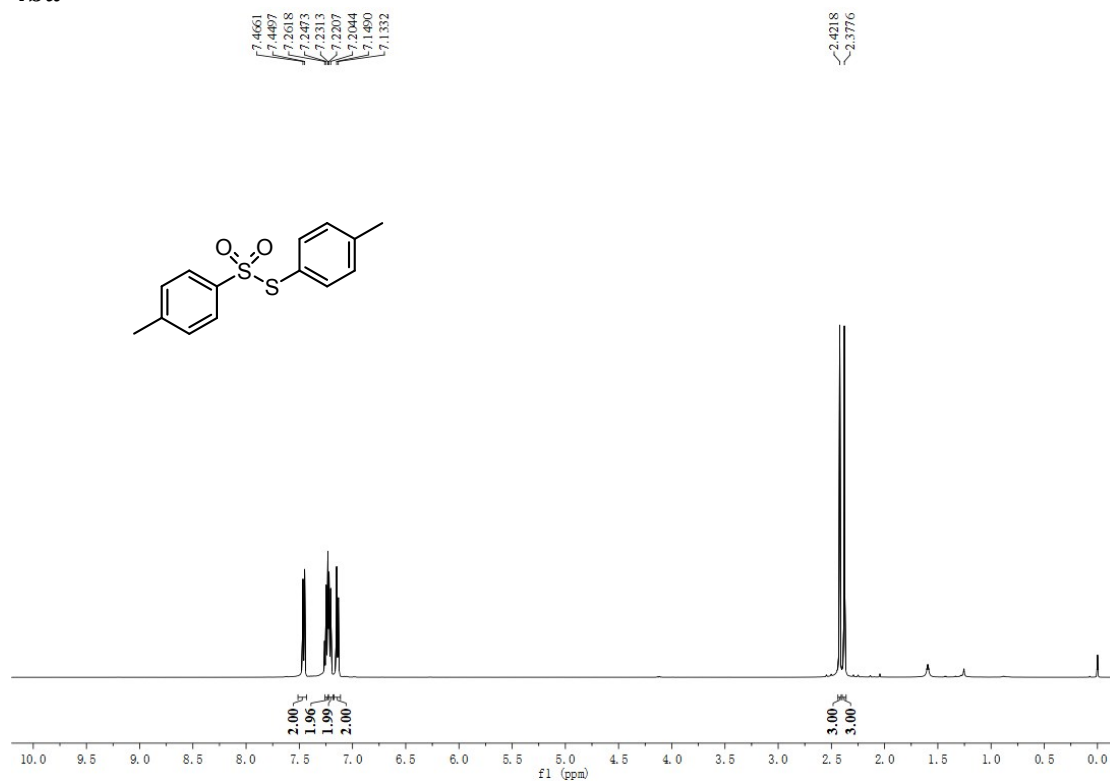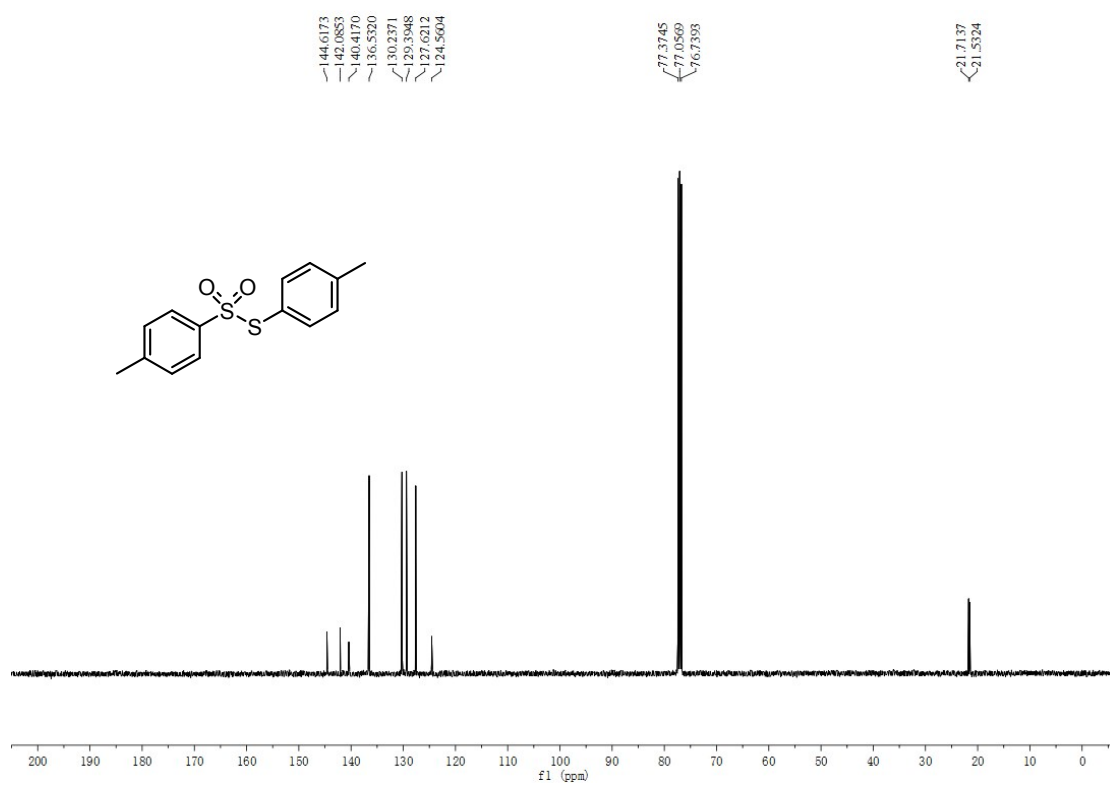



4ca

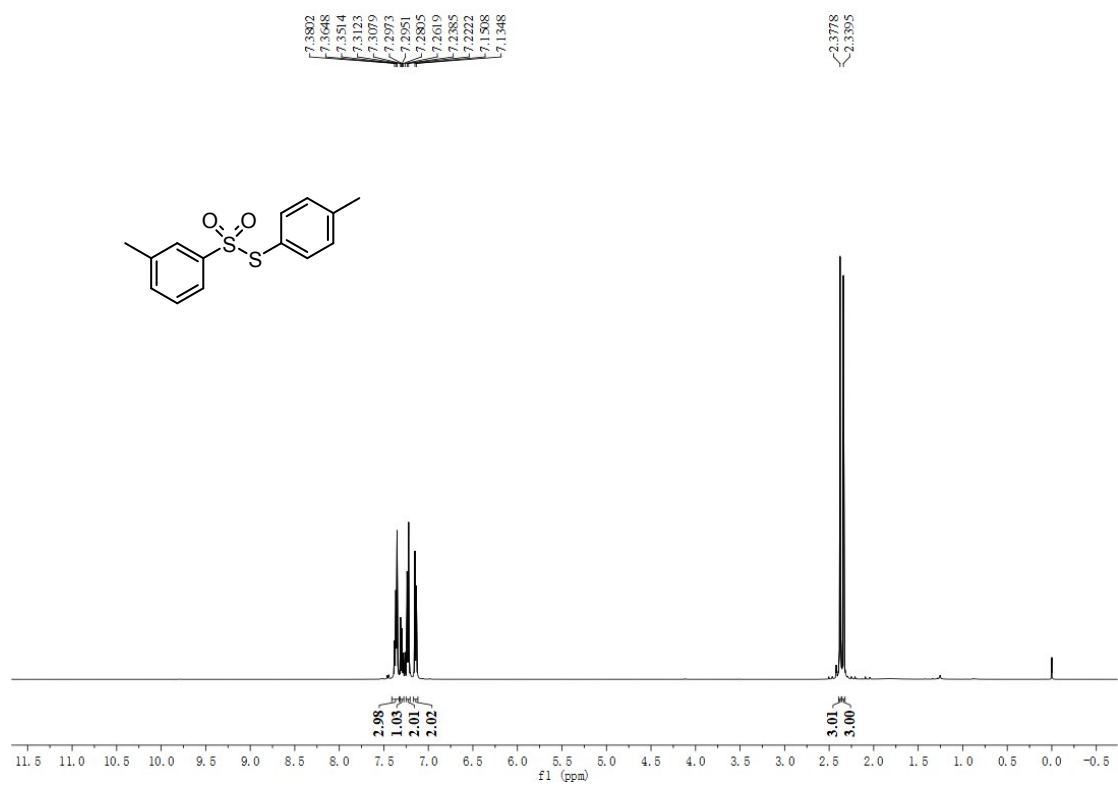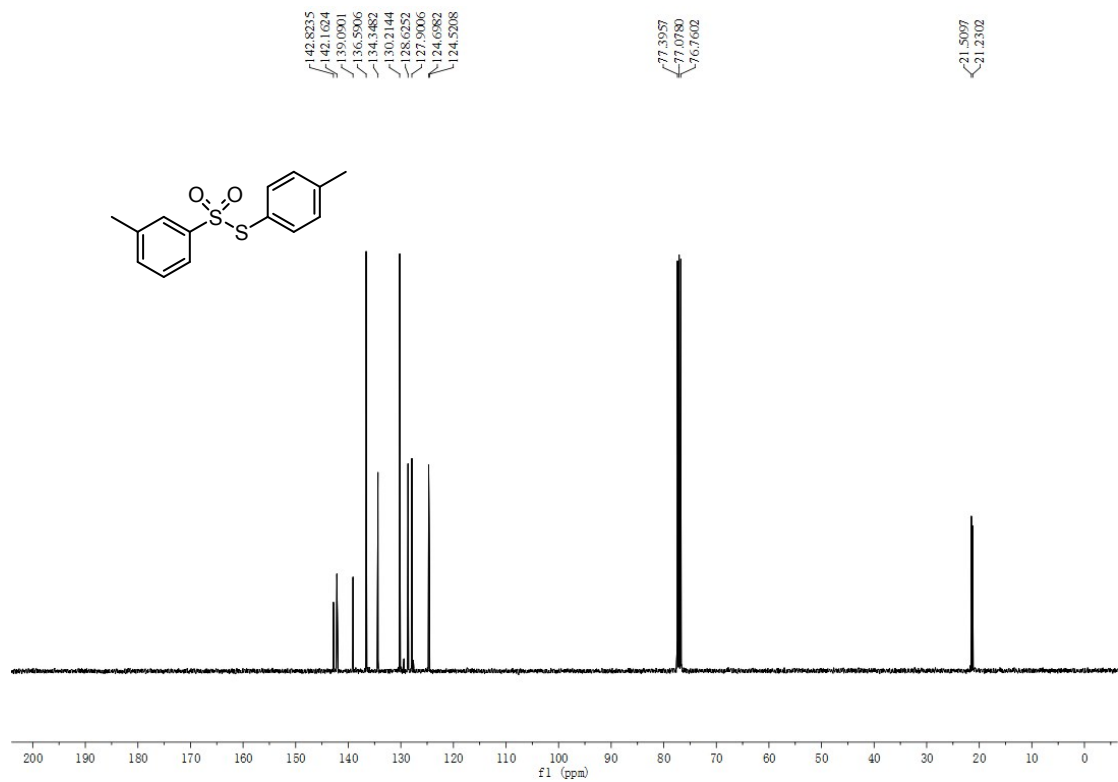

4da

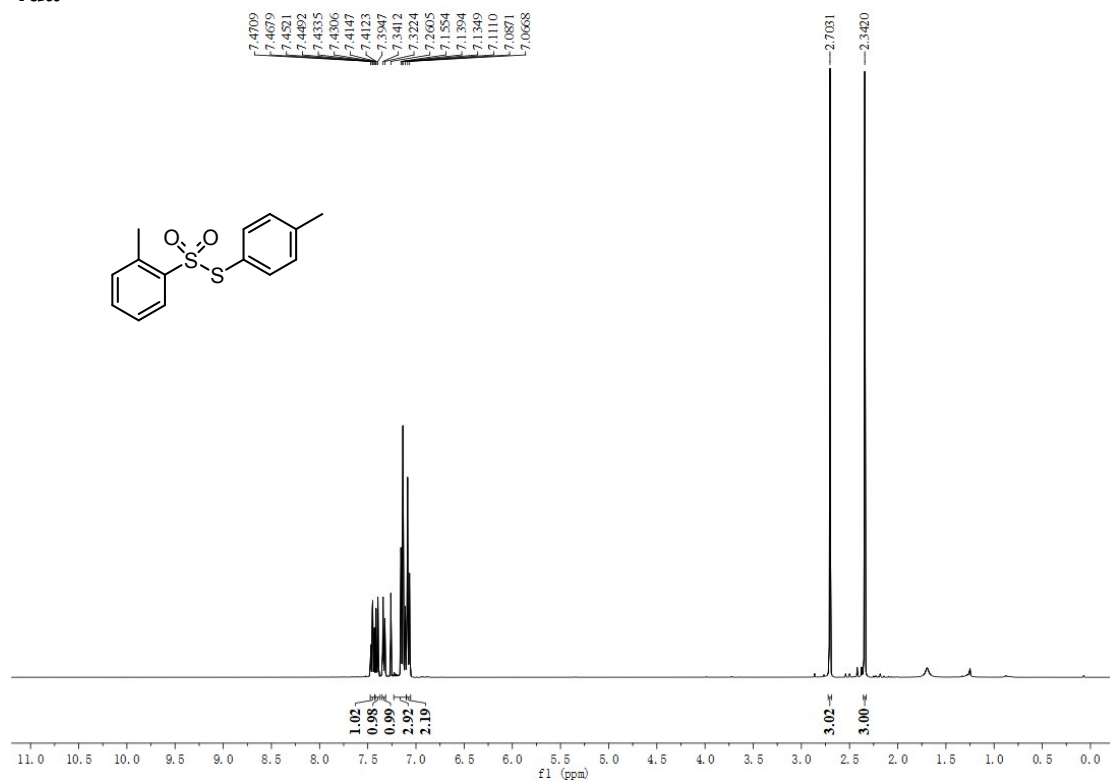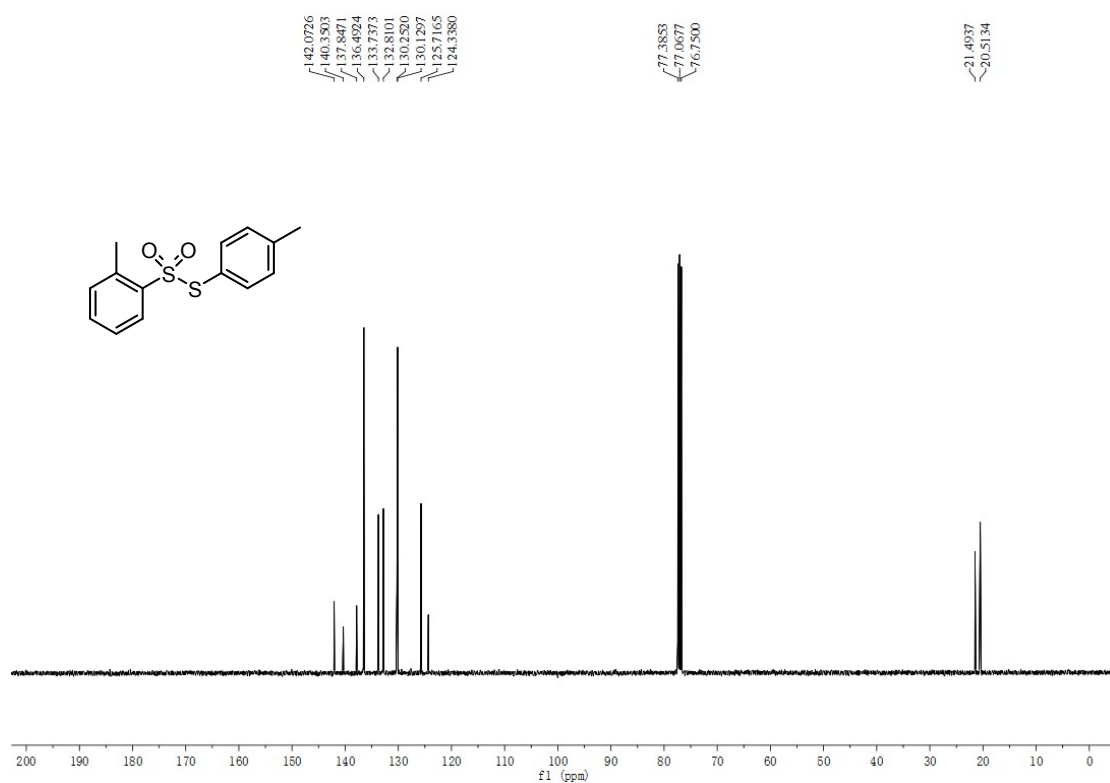

4ea

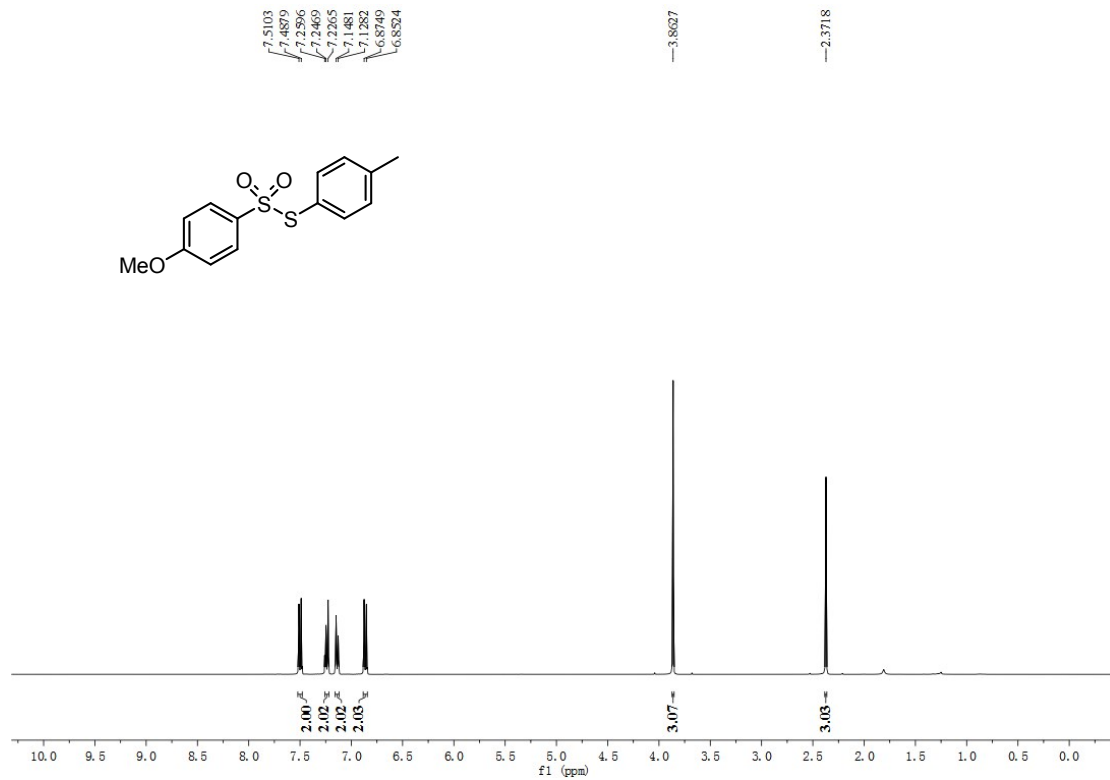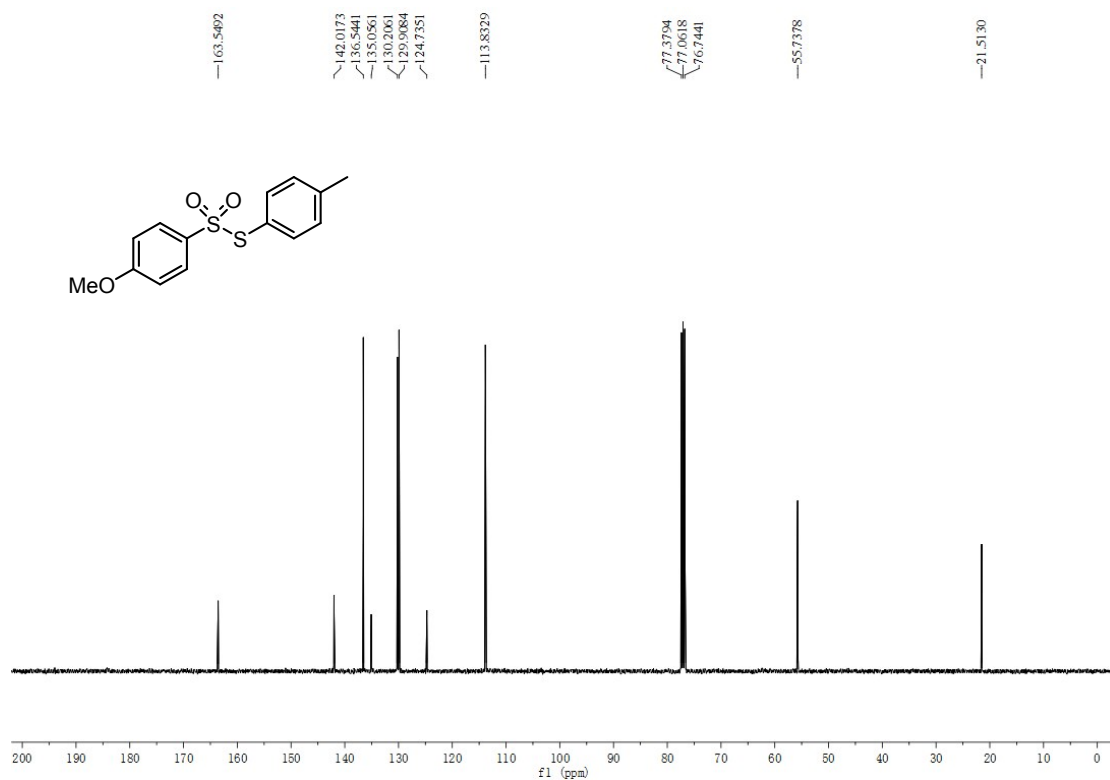

4fa

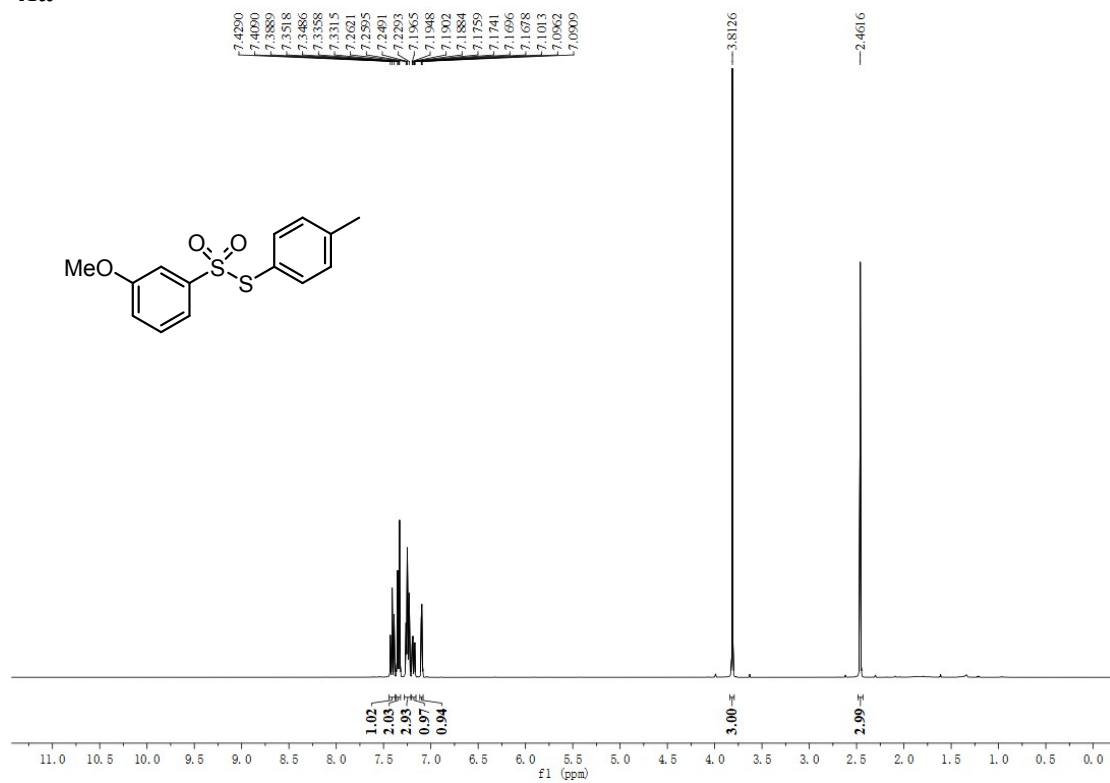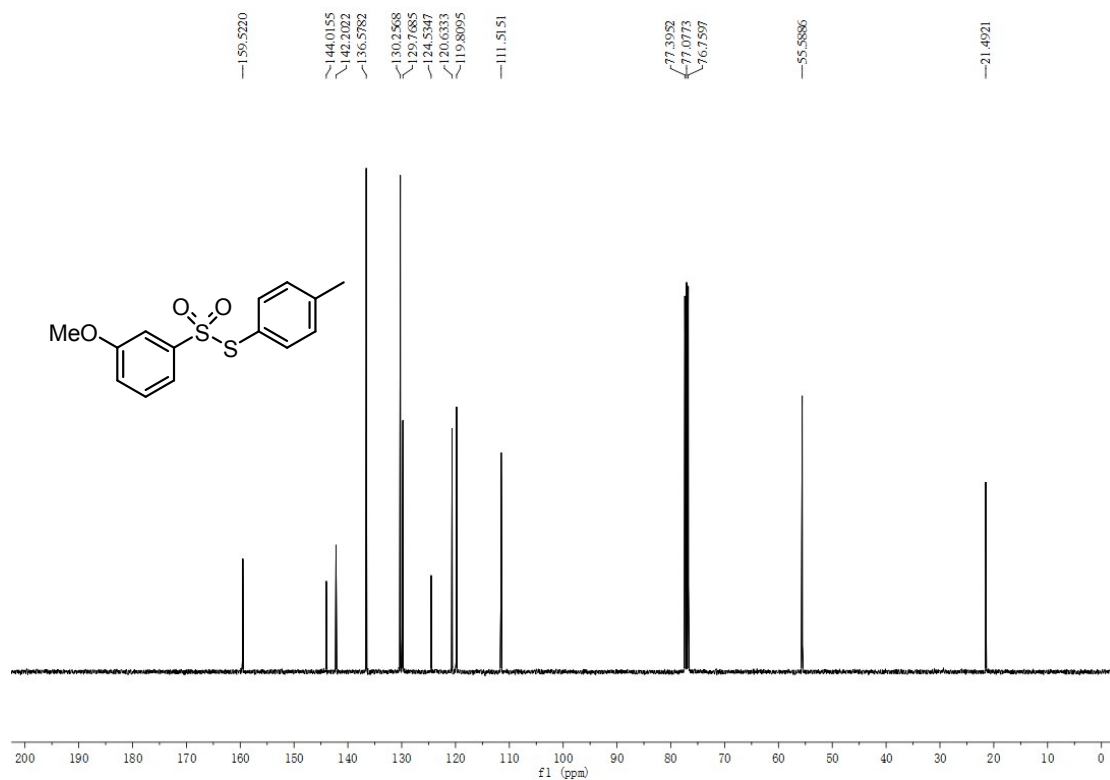

4ga

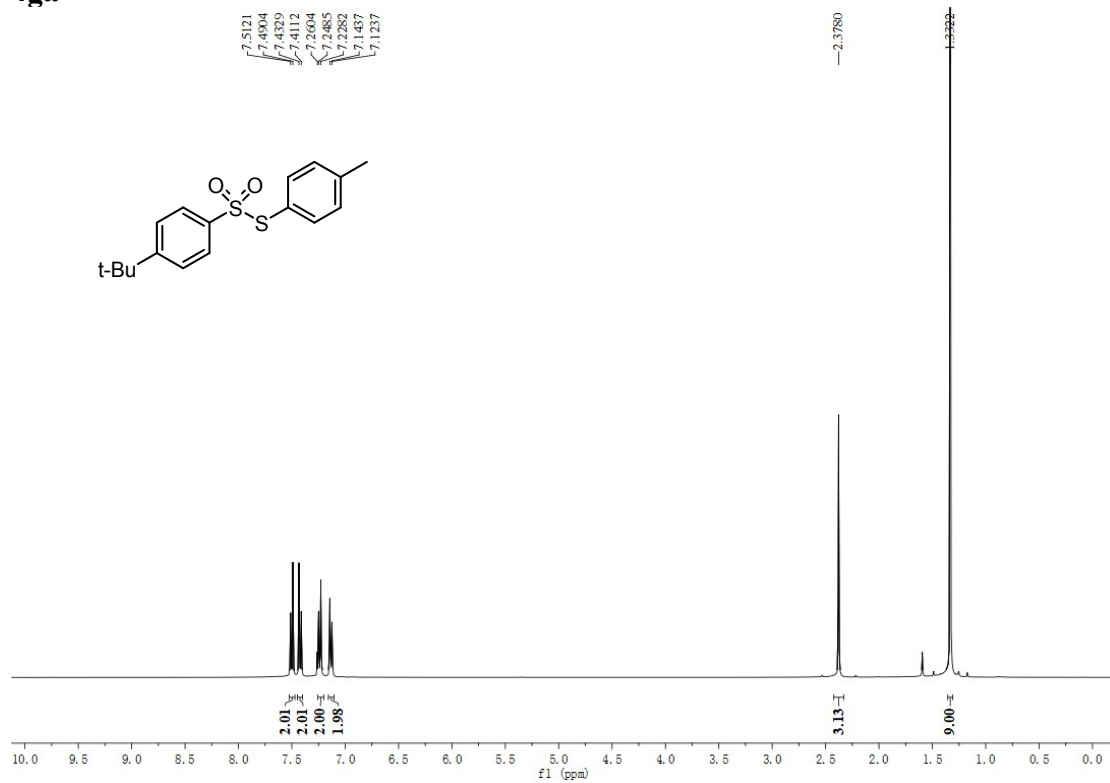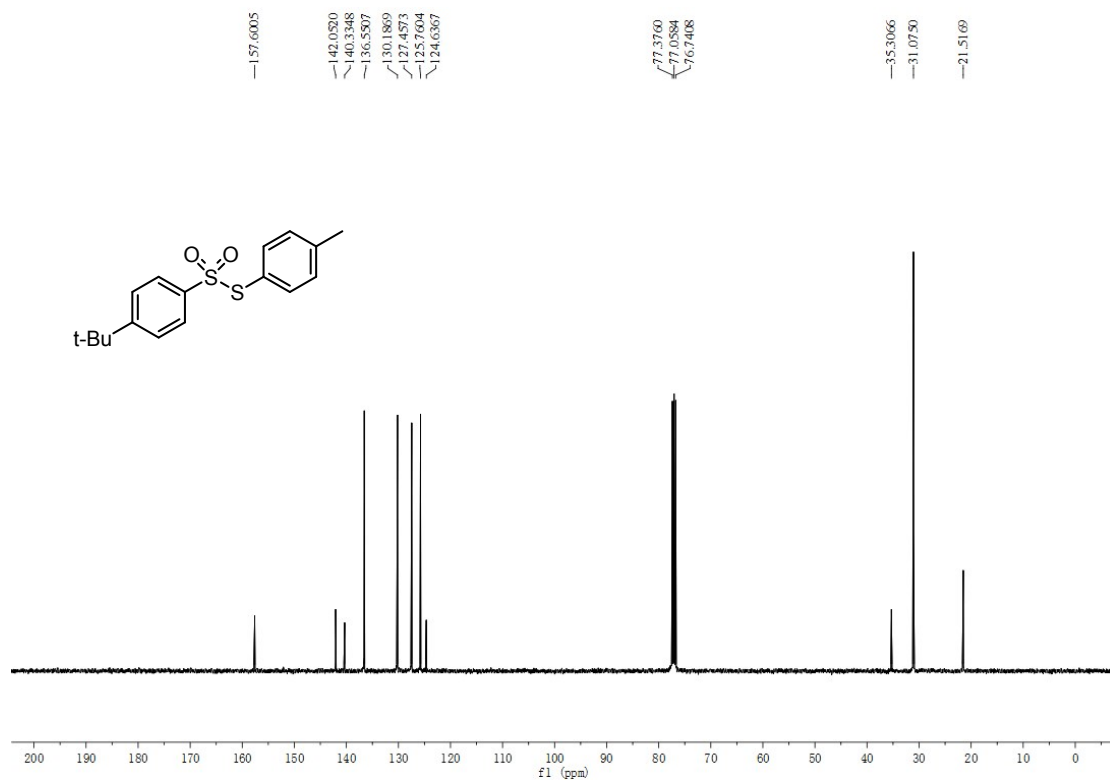

# 4ha

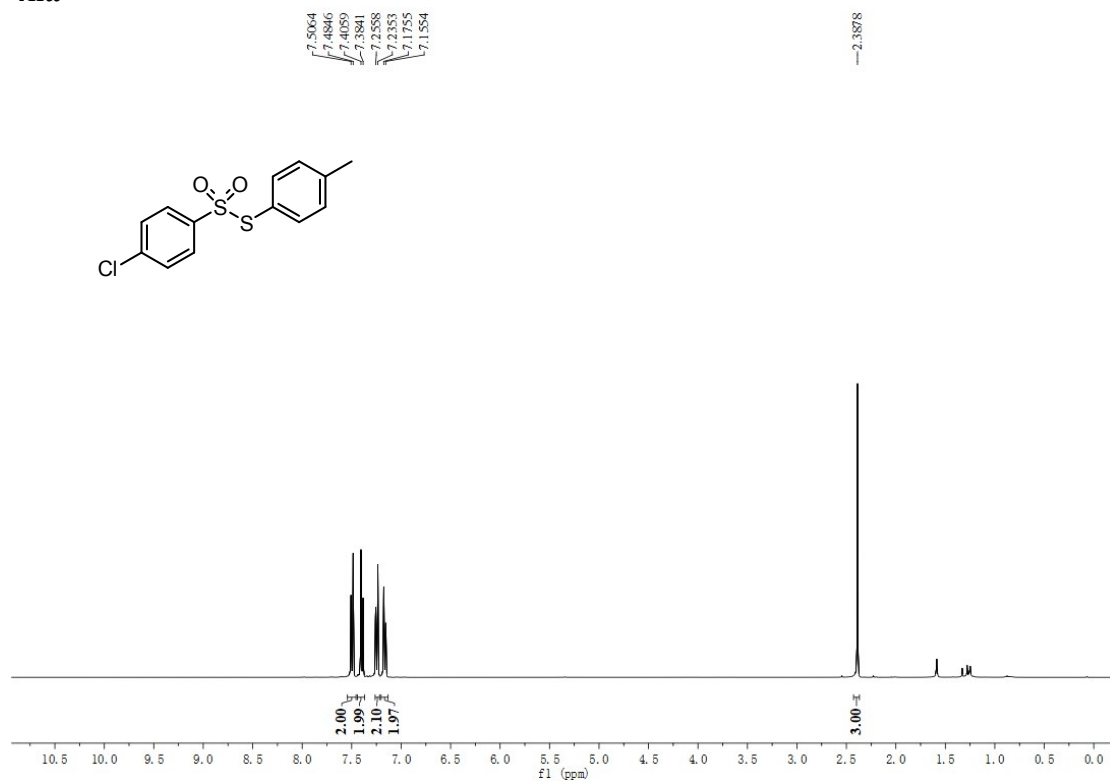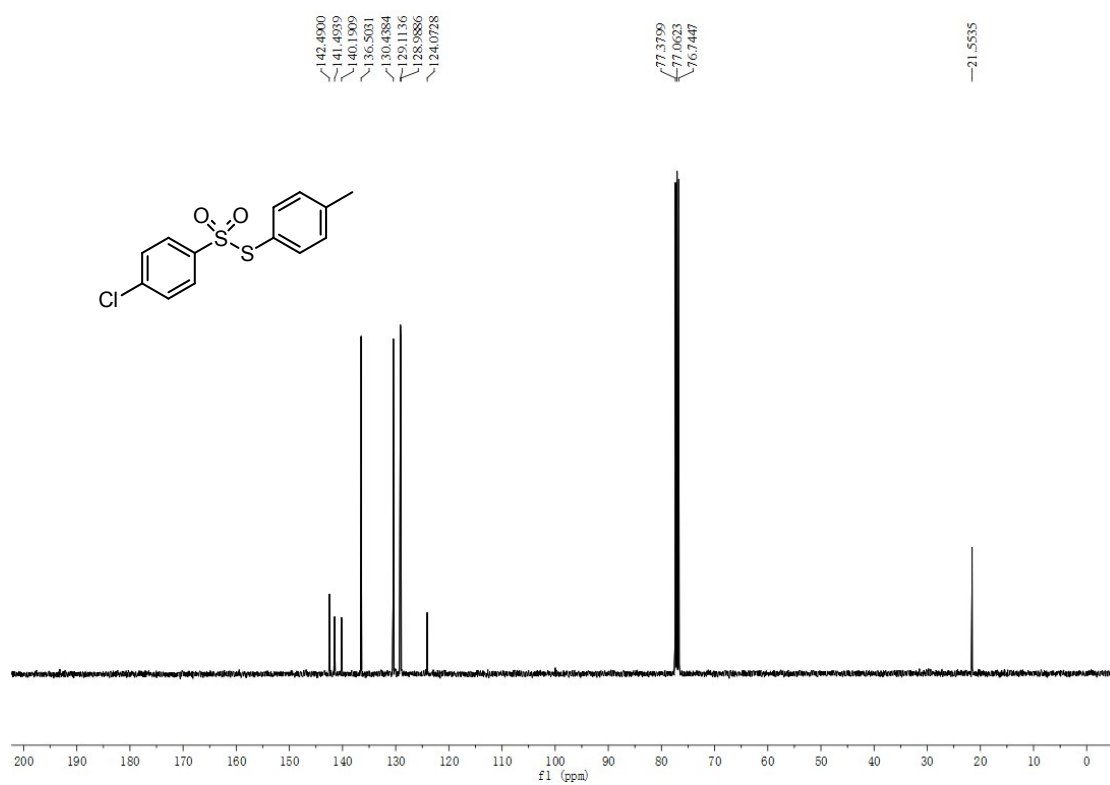

4ia

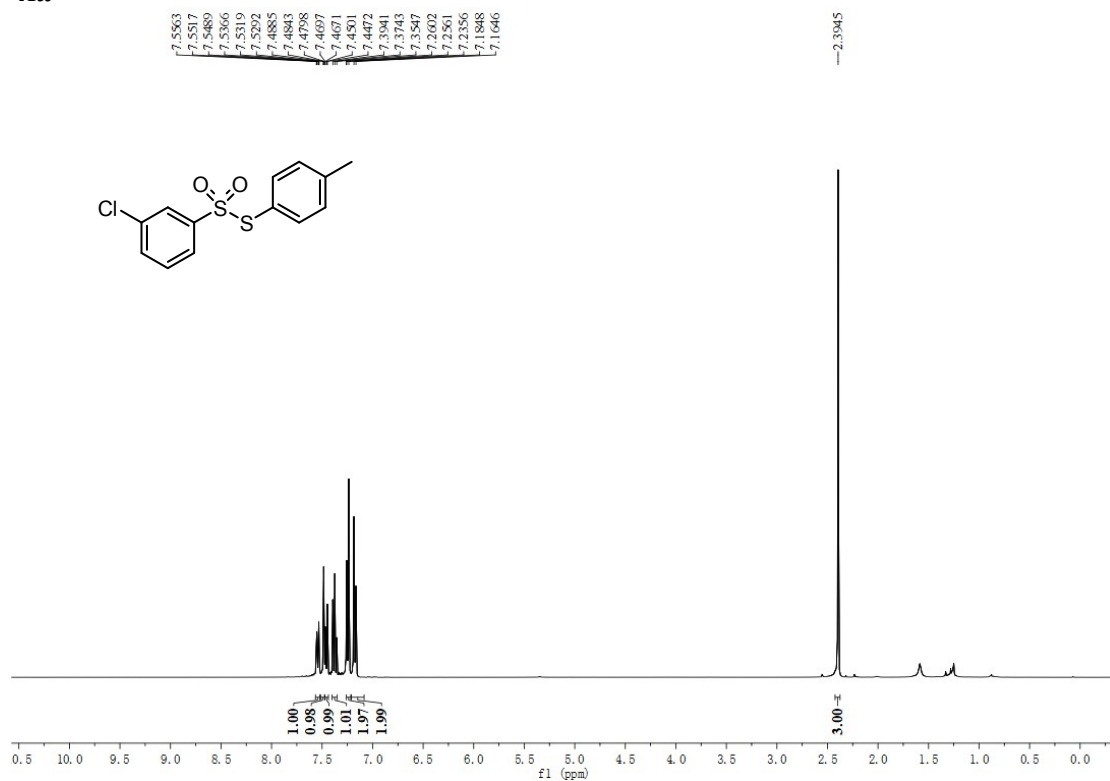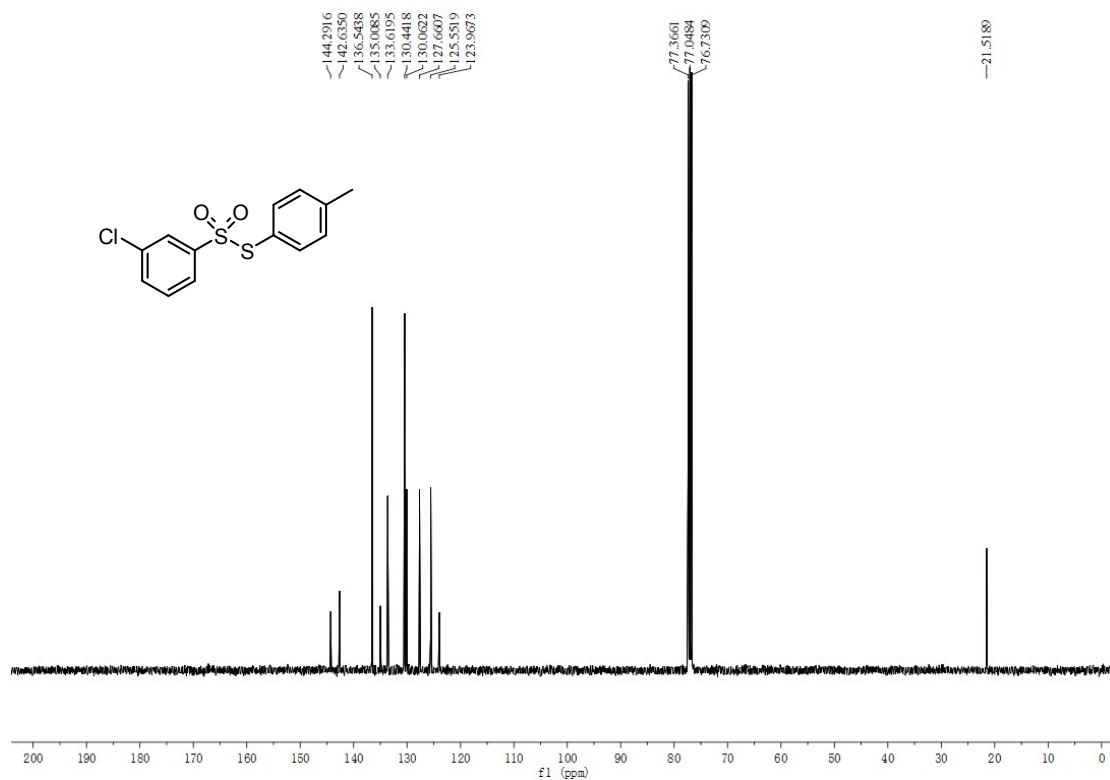

4ja

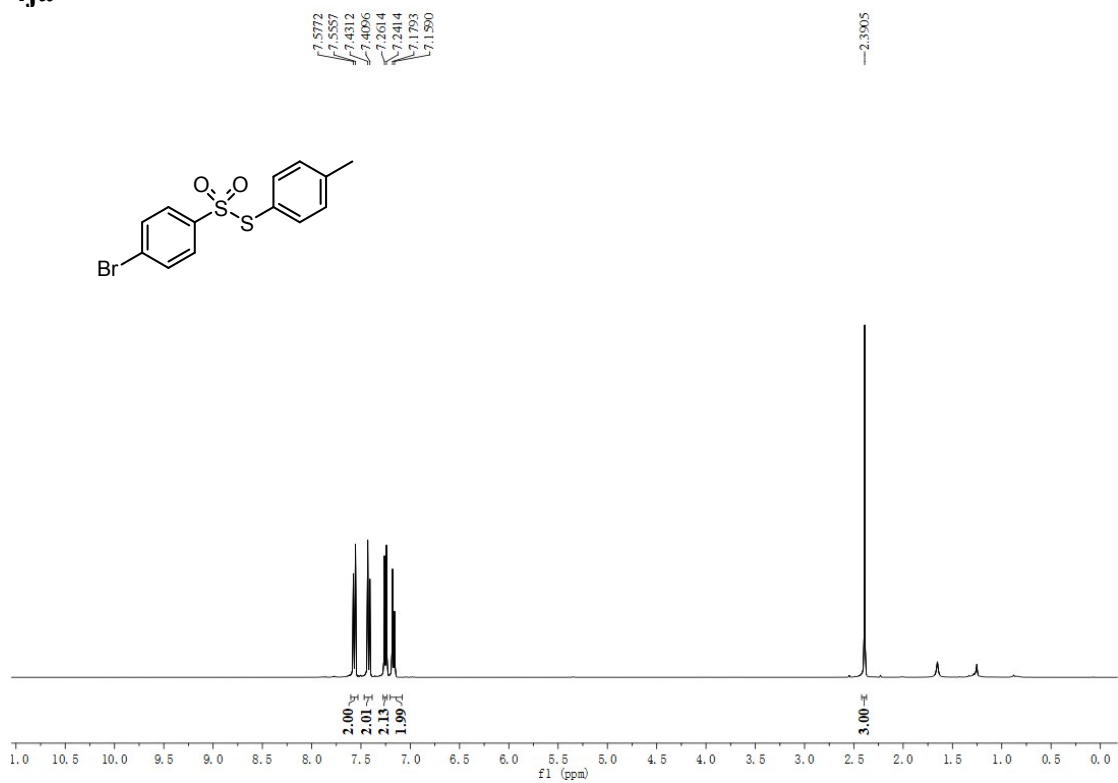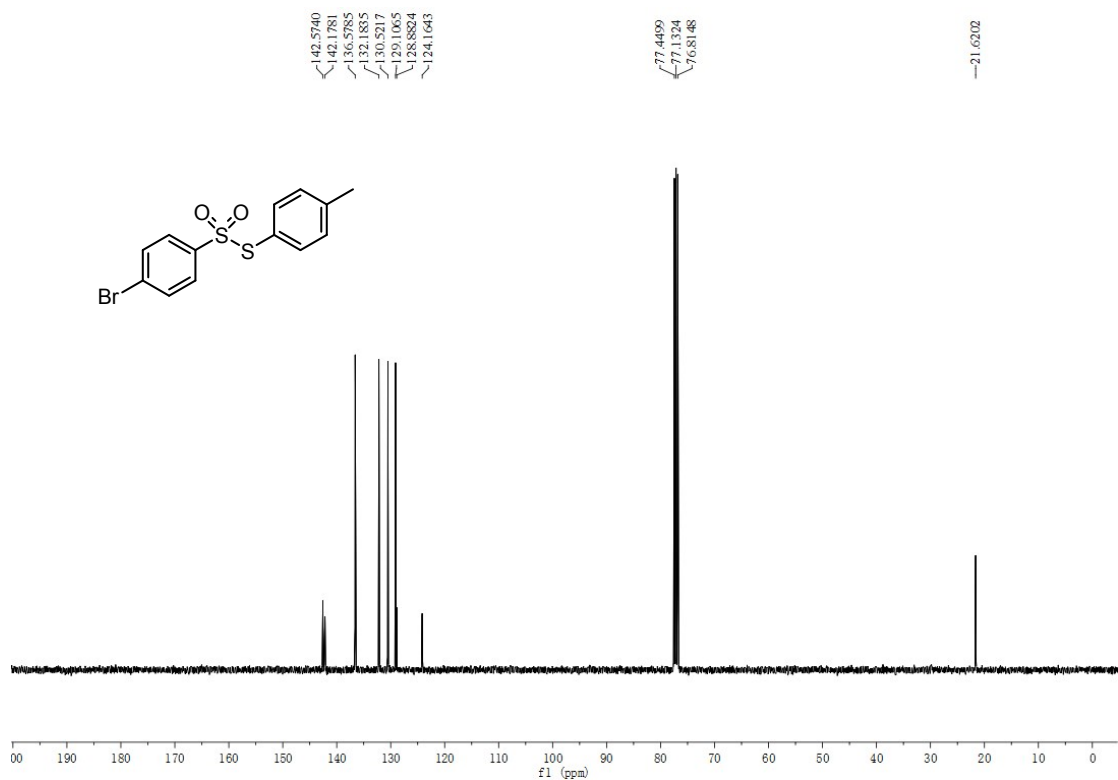



4ka

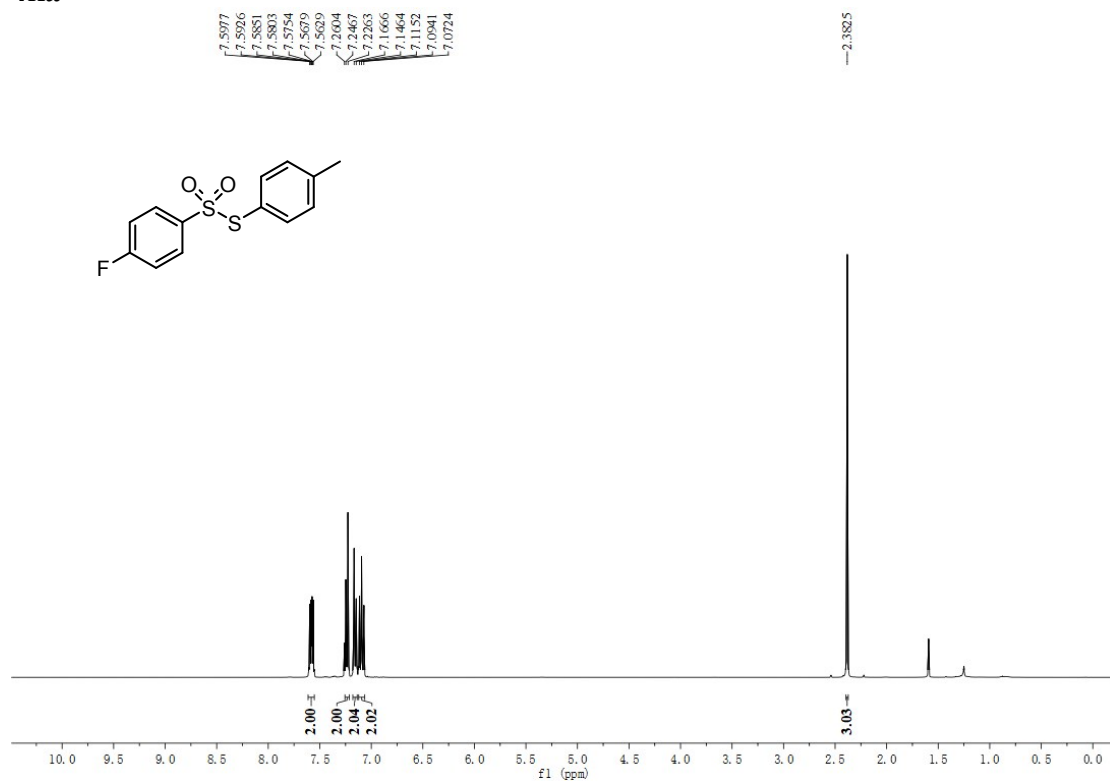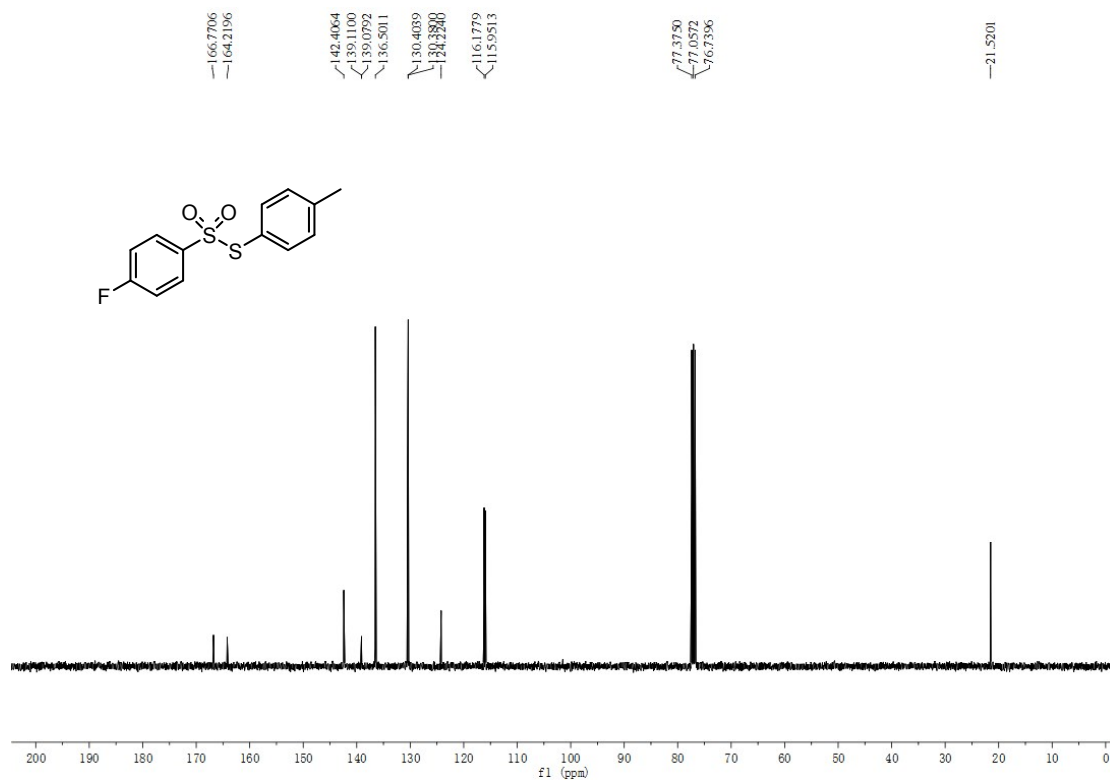

# 4la

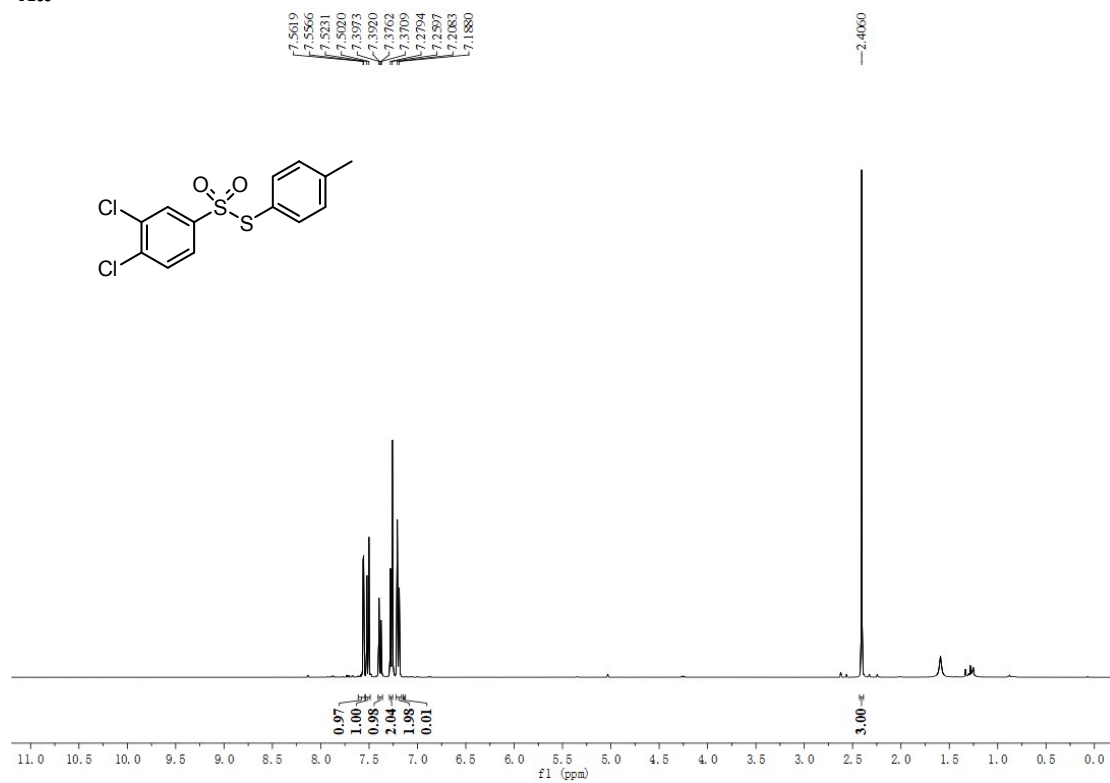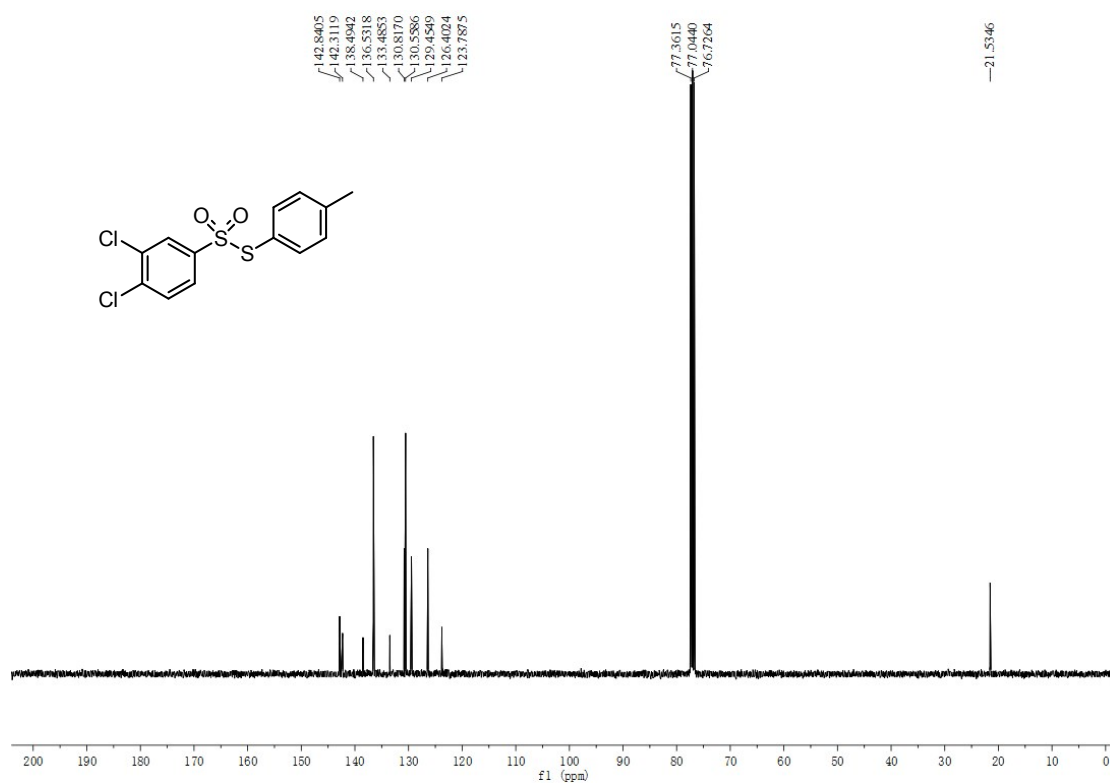

4ma

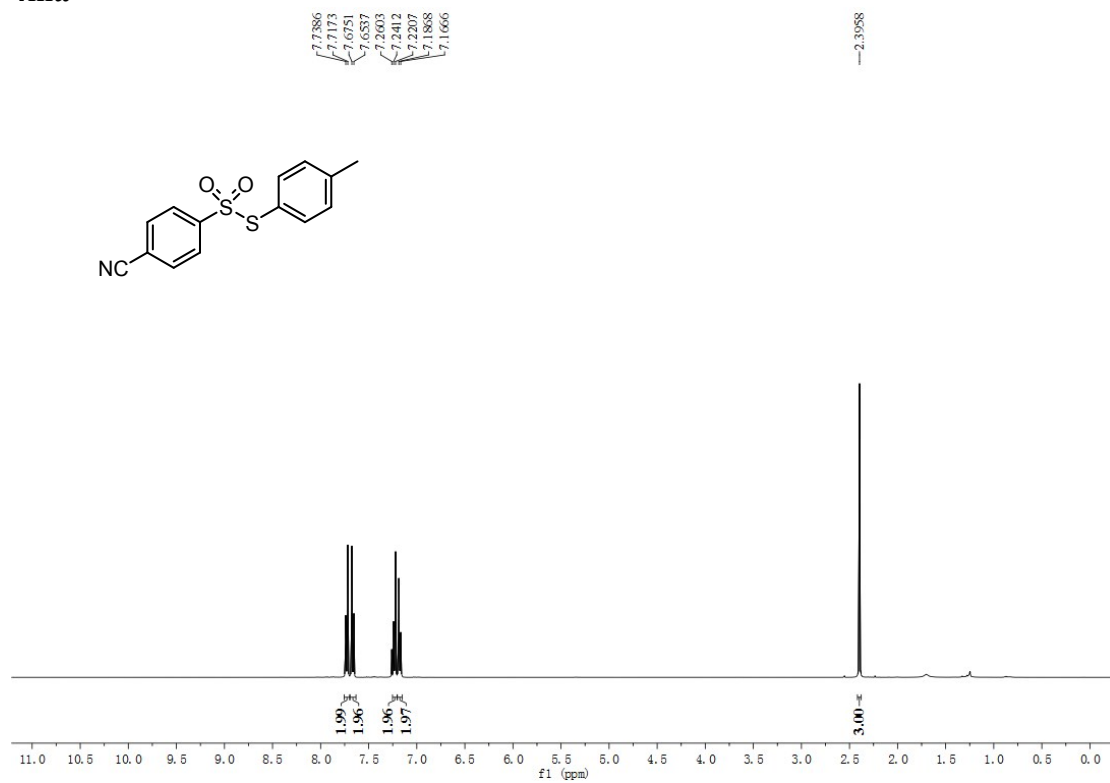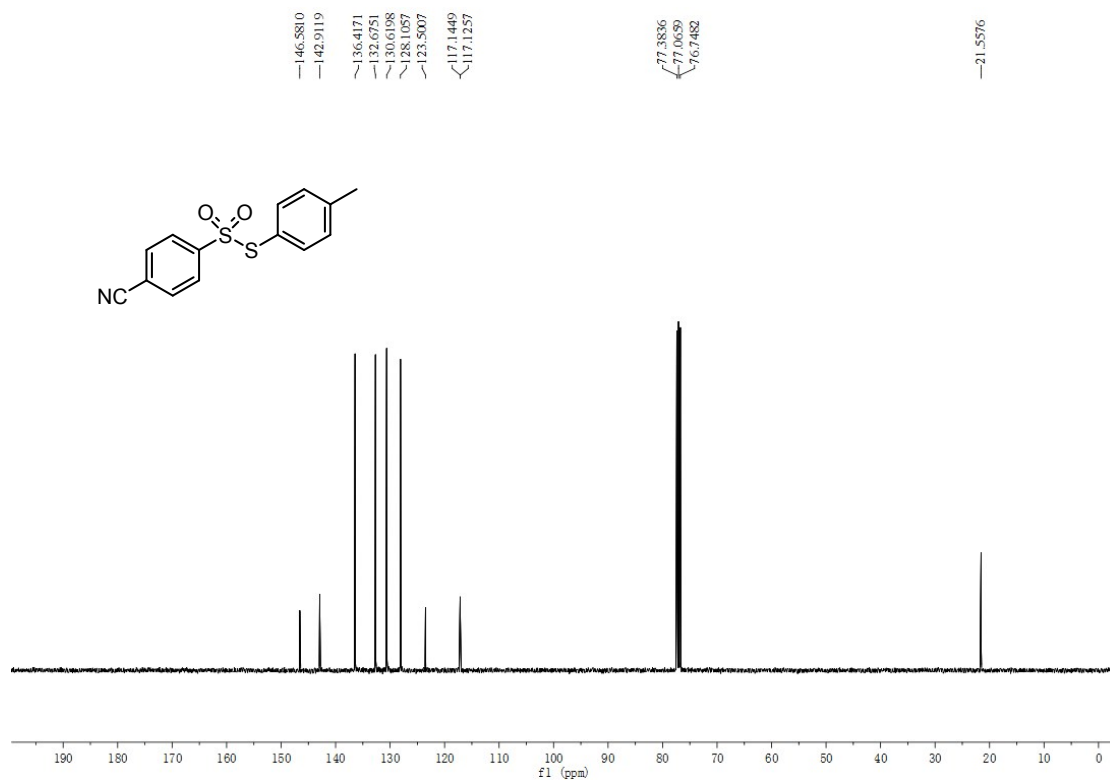

4na

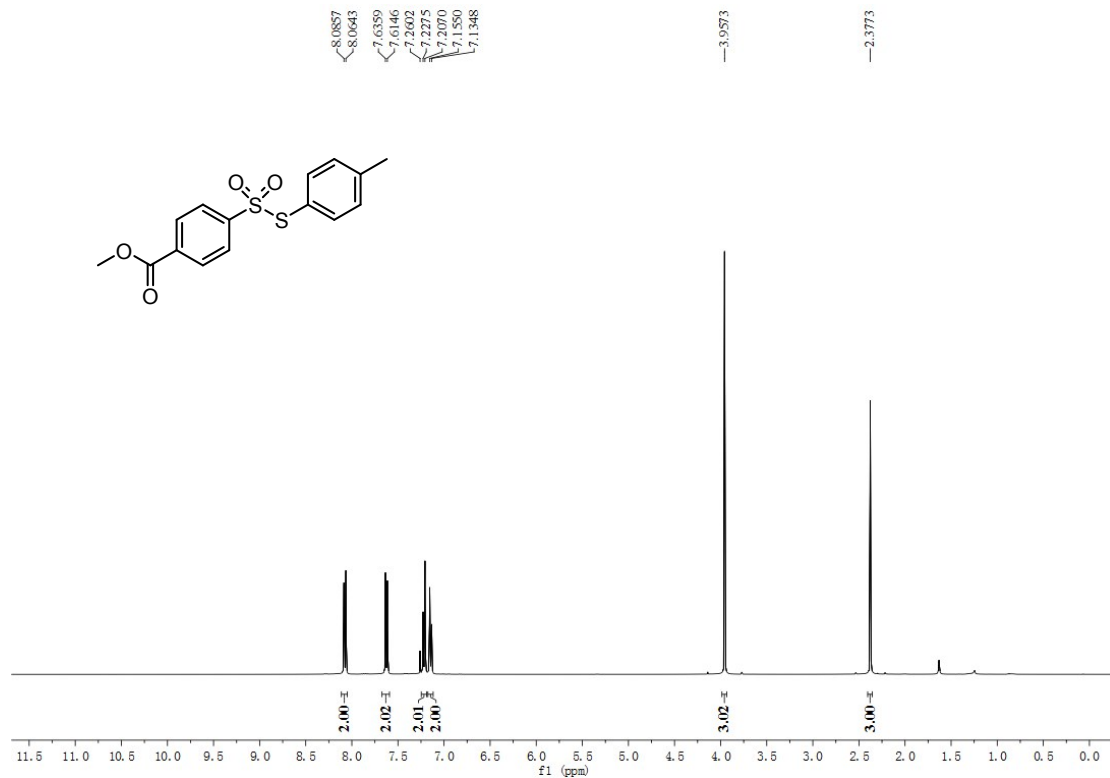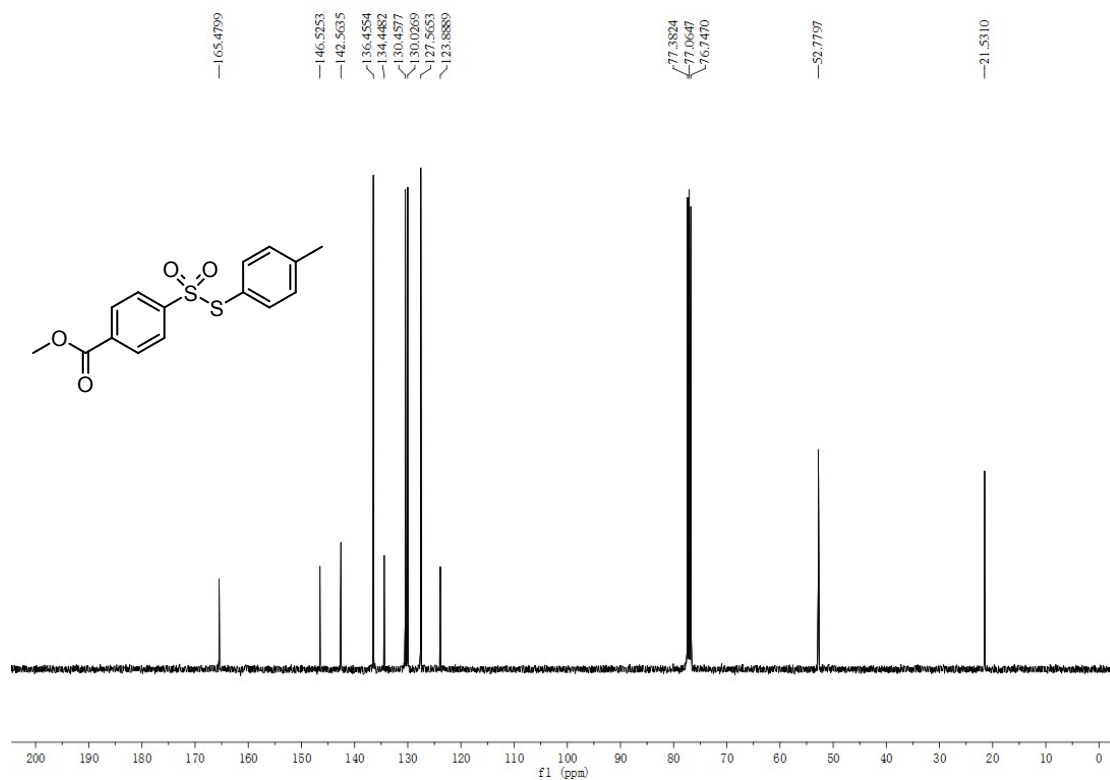

40a

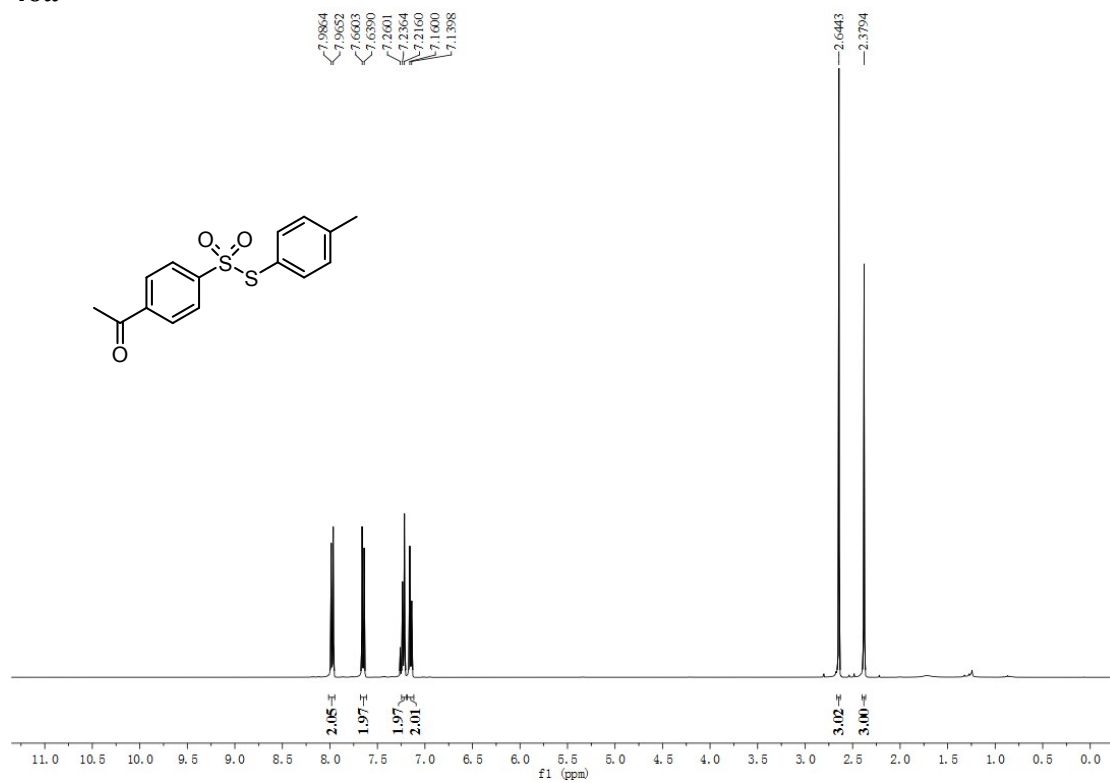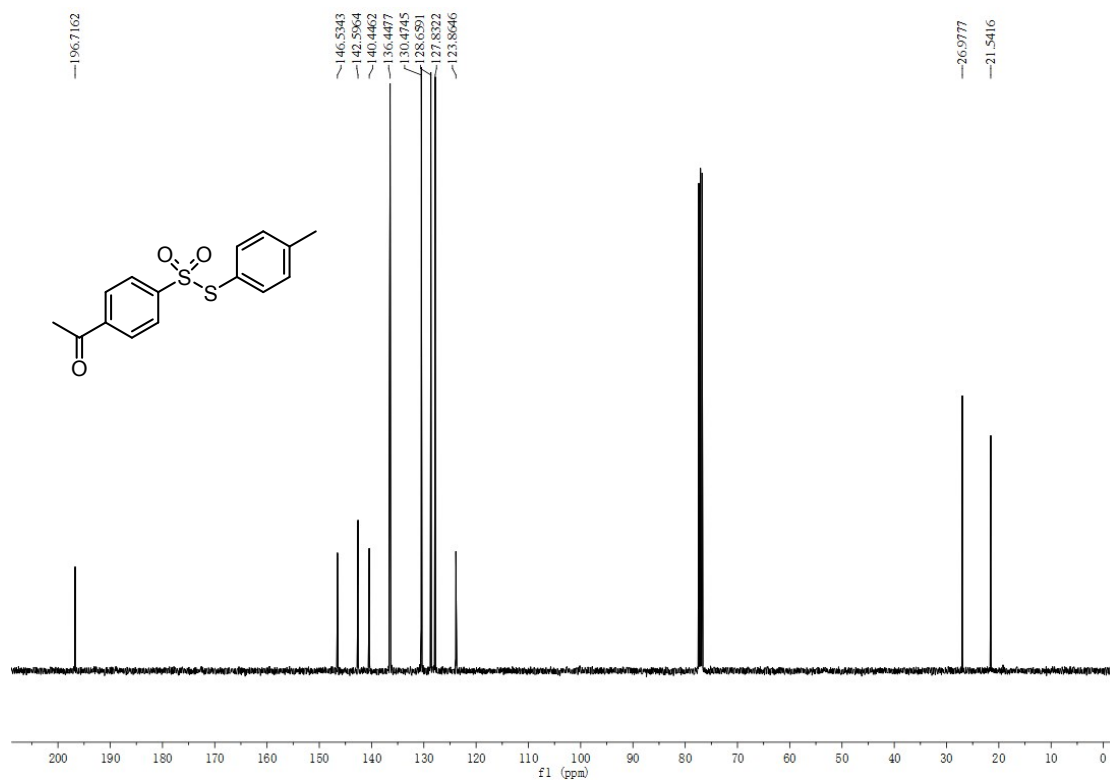

4pa

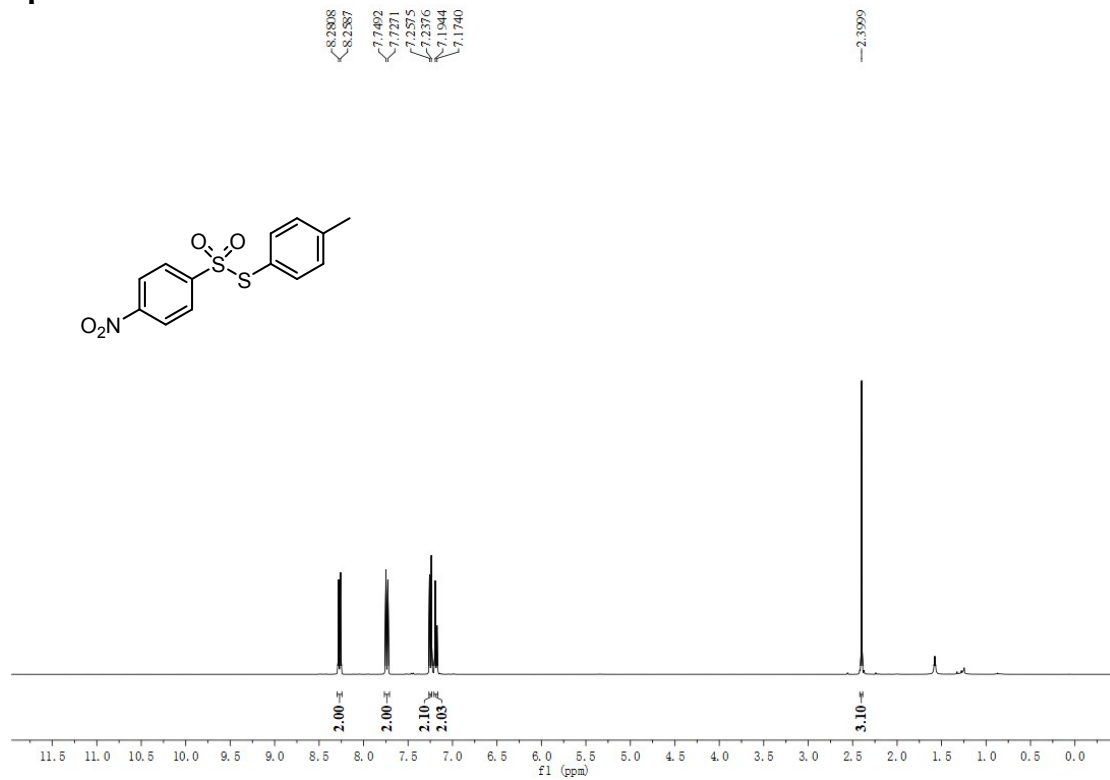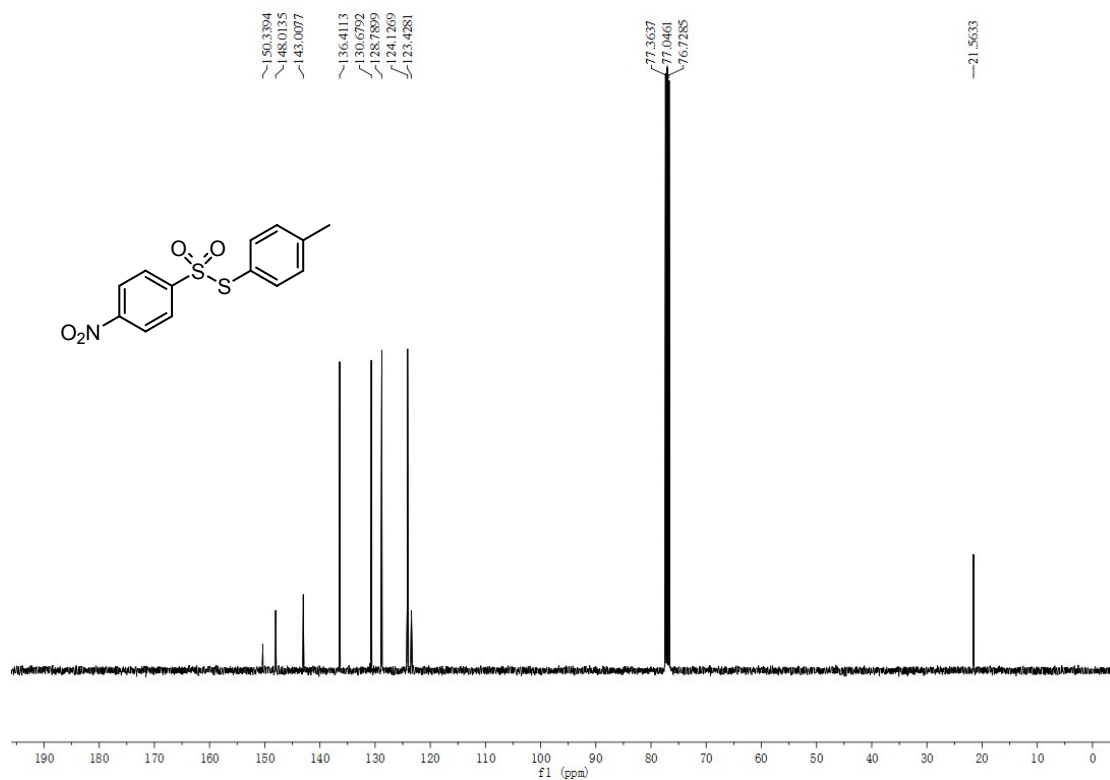

4qa

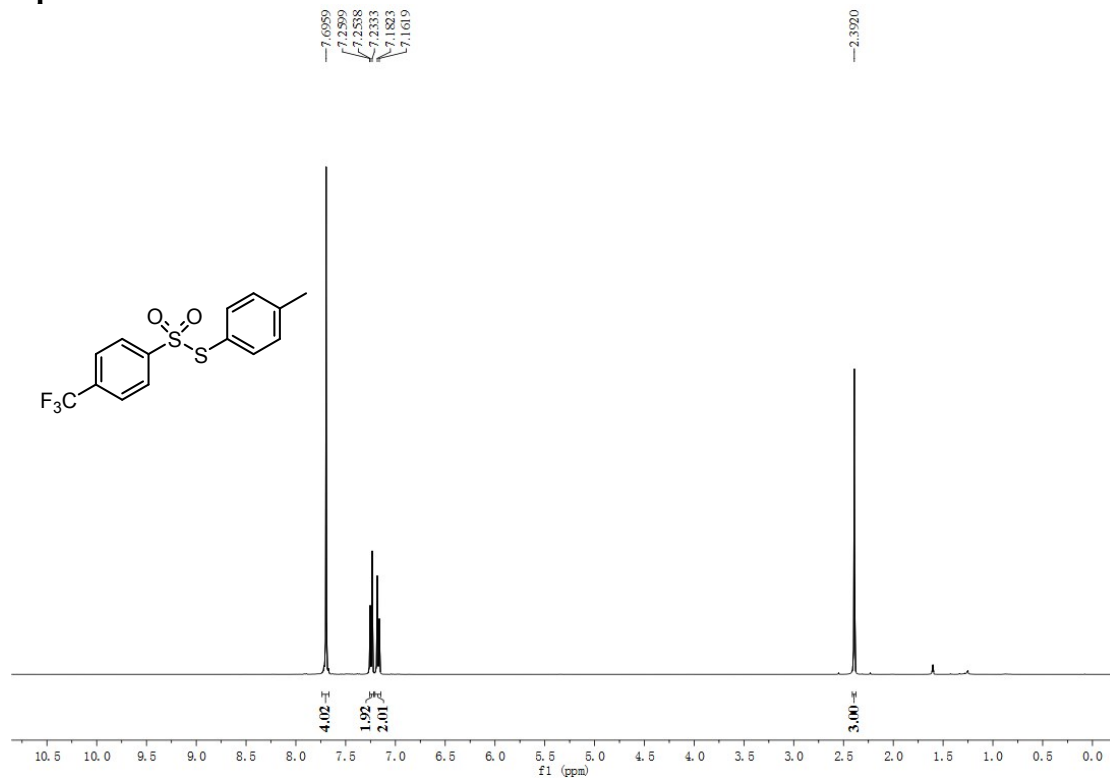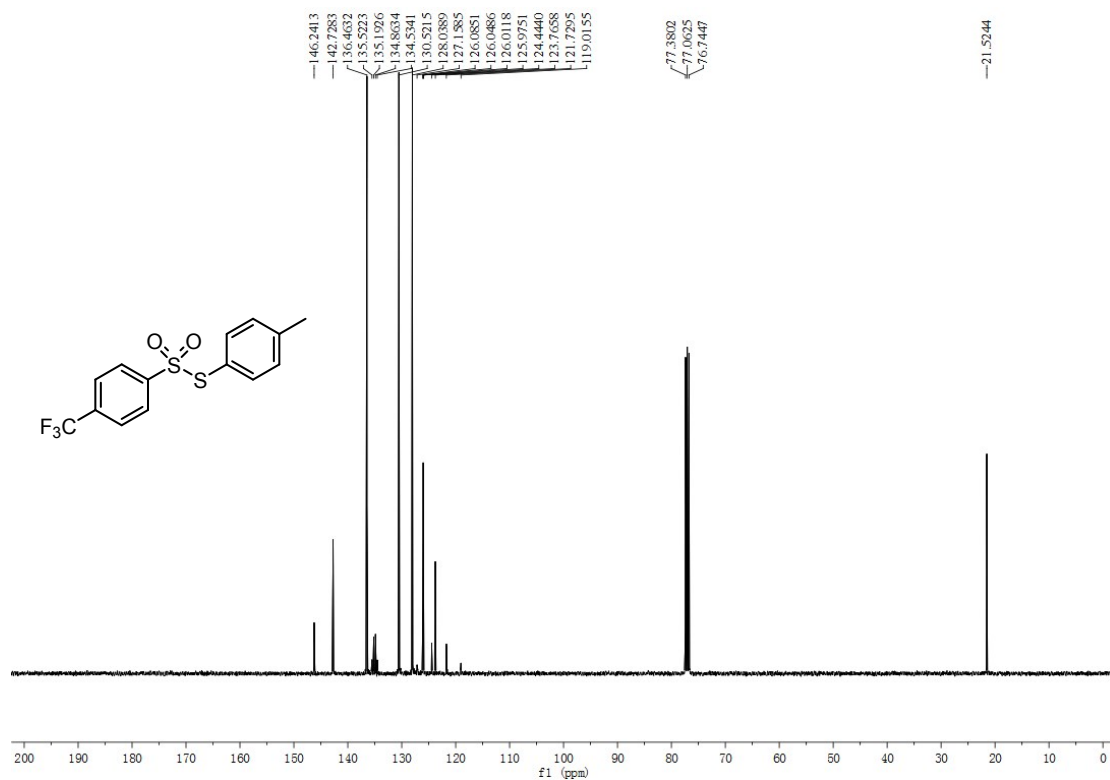

4ra

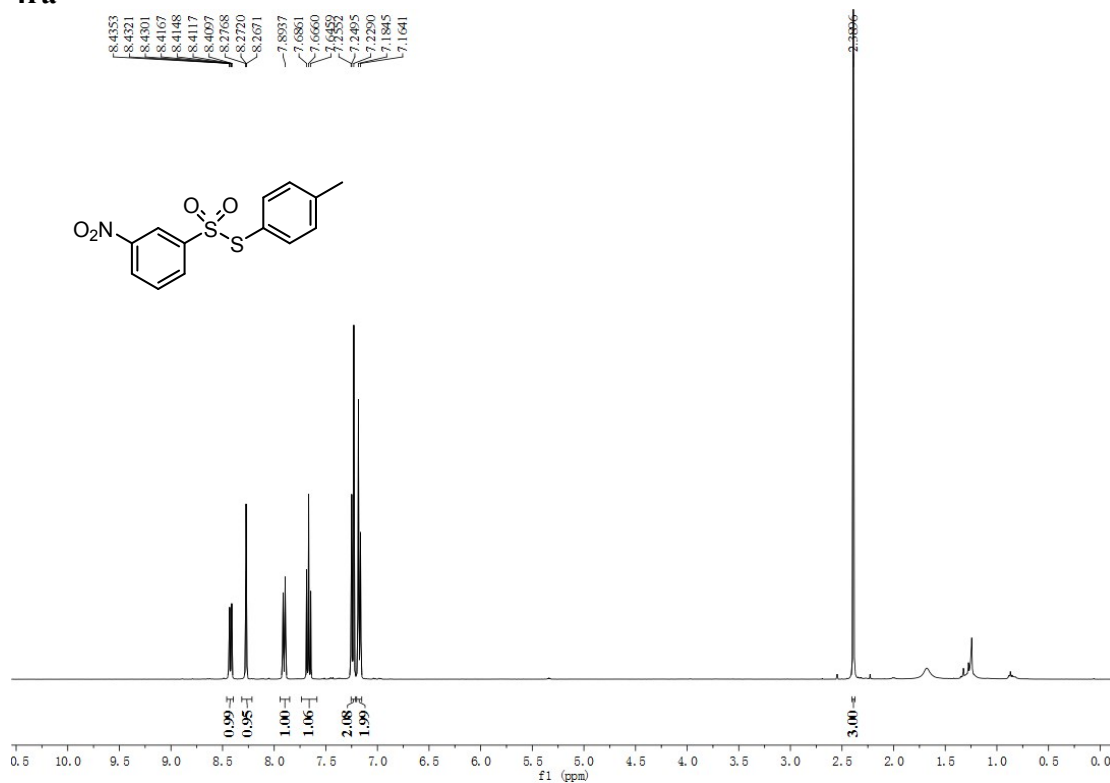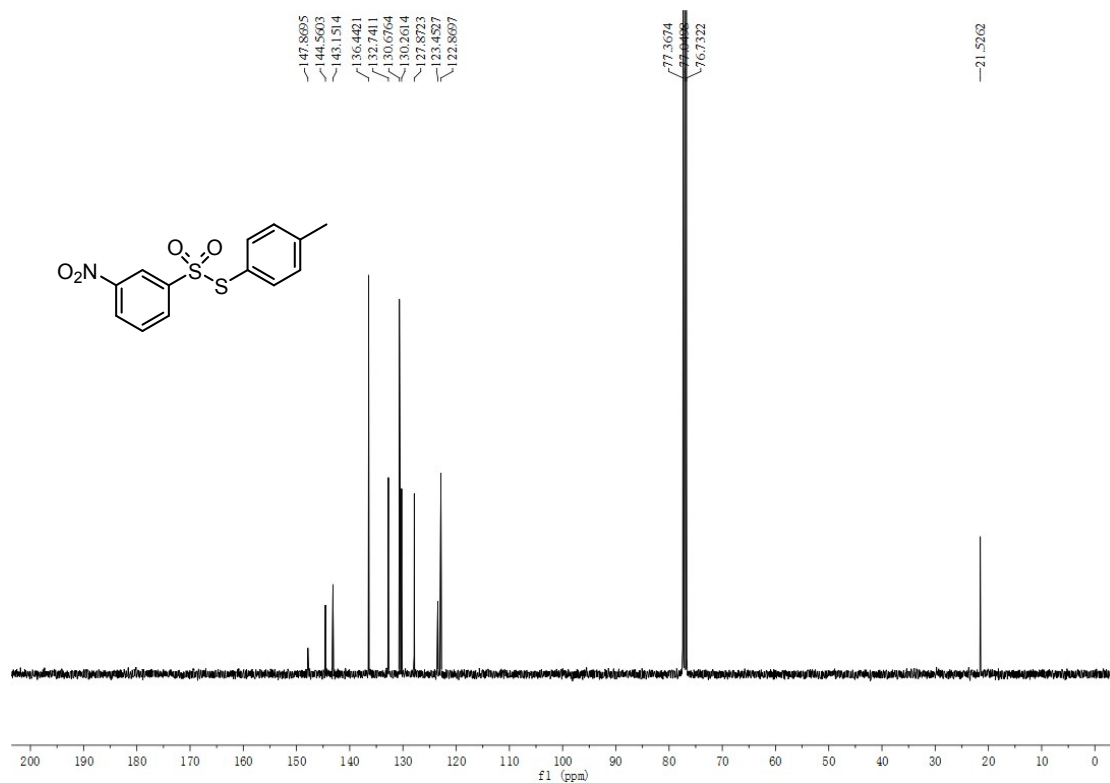

Supplement: d1qo00112d1.pdf [file d1qo00112d1.pdf]
